# Supplementary material for: Correlation between obesity and clinicopathological characteristics in patients with papillary thyroid cancer: a study of 1579 cases: a retrospective study
Source: PeerJ. 2020 Sep 8;8:e9675. doi: 10.7717/peerj.9675 (PMC7485482; doi:10.7717/peerj.9675)
Supplement: Supplemental Information 2 [file peerj-08-9675-s002.xls]

## Sheet: Sheet
gender	age	age1	height	weight	BMI	BMI1	T3	FT3	T4	FT4	TSH	TSH1	CTjgs	tumorsize	bingzaoshu	qcbm	N	cejin	T	TNM
2	52	1	160	72	28.125	4	1.4	4.73	103.4	14.45	1.96	1	2	1	1	1	1	1	1	1
1	52	1	172	85	28.7317	4	1.12	4.49	88.56	13.82	0.99	1	2	1	1	1	1	1	1	1
2	52	1	150	65	28.8889	4	1.2	3.75	83.59	10.04	4.97	2	2	1	2	1	1	1	1	1
2	52	1	152	67	28.9993	4	1.66	3.89	80.12	8.61	7.06	2	2	2	2	1	1	1	1	1
2	52	1	158	75	30.0433	4	1.28	3.89	86.08	11.19	2.53	1	2	1	2	1	1	1	1	1
2	52	1	159	76	30.0621	4	2.05	5.82	129.37	10.96	2.74	1	2	2	2	1	2	1	1	1
2	52	1	172	89	30.0838	4	1.45	4.98	92.79	10.78	2.85	1	2	1	1	1	2	1	1	1
1	52	1	170	88	30.4498	4	1.69	4.9	81.97	9.83	3.51	1	5.14	1	1	1	1	1	1	1
2	52	1	153	72	30.7574	4	1.69	4.63	108.22	12.66	2.11	1	2	2	1	1	2	1	1	1
2	52	1	157	76	30.8329	4	1.46	4.09	115.54	10.47	3.61	1	2	2	2	1	2	1	1	1
1	52	1	169	90	31.5115	4	1.77	4.38	103.12	11.5	1.69	1	2	1	2	1	2	2	1	1
2	51	1	154	67	28.251	4	1.84	5.6	104.11	11.25	1.51	1	2	1	1	1	1	1	1	1
2	51	1	160	73	28.5156	4	1.8	4.81	119.43	10.24	2.14	1	2	2	1	1	1	1	1	1
2	51	1	166	80	29.0318	4	1.44	4.13	110.36	11.17	3.76	1	2	2	2	2	2	2	2	1
1	51	1	163	80	30.1103	4	1.45	4.94	85.52	10.48	3.11	1	2	1	2	1	1	1	1	1
1	51	1	183	103	30.7564	4	1.67	5.06	95.03	10.3	4.06	1	2	2	1	1	1	1	1	1
2	51	1	159	78	30.8532	4	1.46	4.67	101.66	10.32	2.5	1	2	1	2	1	2	1	1	1
1	51	1	173	93	31.0735	4	1.56	4.17	79.63	9.89	1.24	1	2	1	2	1	1	1	1	1
1	51	1	169	89	31.1614	4	1.6	4.38	110.66	10.64	1.42	1	2	1	1	1	1	1	1	1
2	51	1	160	82	32.0312	4	1.44	5.15	92.19	11.32	3.4	1	2	2	1	2	1	1	2	1
2	51	1	156	80	32.8731	4	1.27	3.43	82.67	10.6	3.71	1	2	1	1	1	1	1	1	1
2	51	1	163	90	33.8741	4	1.41	4.21	96.32	8.83	1.77	1	2	1	1	1	1	1	1	1
1	51	1	171	101	34.5405	4	1.26	3.9	117.86	13.48	1.67	1	2	1	2	1	2	1	1	1
2	51	1	159	89	35.2043	4	1.38	4.3	113.98	11.55	3.18	1	2	2	1	2	2	1	2	1
2	51	1	152	83	35.9245	4	1.49	4.54	138.91	14.87	1.27	1	2	1	1	1	1	1	1	1
1	50	1	179	90	28.089	4	1.39	5.23	107.95	12.92	1.82	1	2	2	1	1	2	2	1	1
2	50	1	160	72	28.125	4	1.72	4.19	115.54	14.77	3.43	1	2	1	1	1	1	1	1	1
2	50	1	155	68	28.3039	4	1.81	5.34	101.07	16.49	1.07	1	2	2	2	2	1	1	2	1
2	50	1	162	76	28.959	4	1.31	4.81	123.37	12.87	1.07	1	2	1	2	1	1	1	1	1
2	50	1	153	68	29.0487	4	1.48	4.06	92.01	10.46	1.45	1	2	2	2	1	2	2	1	1
2	50	1	157	73	29.6158	4	1.17	3.68	93.06	10.71	1.09	1	2	1	1	1	1	1	1	1
1	50	1	173	89	29.737	4	1.28	4.08	84.41	11.92	3.83	1	2	1	2	2	2	2	2	1
2	50	1	159	76	30.0621	4	1.37	4.03	78.99	10.59	4.05	1	2	1	2	1	1	1	1	1
2	50	1	160	78	30.4688	4	1.24	4.22	80.61	10.89	5.08	2	2	1	1	1	2	2	1	1
2	49	1	162	75	28.578	4	1.22	4.29	95.37	12.96	1.81	1	2	2	1	2	2	1	2	1
2	49	1	157	71	28.8044	4	1.56	4.63	107.23	11.02	1.39	1	2	2	1	1	2	1	1	1
2	49	1	161	75	28.9341	4	1.6	4.53	109	8.99	5.97	2	2	1	1	1	2	1	1	1
2	49	1	158	73	29.2421	4	1.78	4.34	95.62	11.44	1.92	1	2	1	1	1	1	1	1	1
2	49	1	159	75	29.6665	4	1.32	4.76	91.93	10.35	1.51	1	2	1	2	1	2	1	1	1
2	49	1	165	84	30.854	4	1.46	4.4	90.04	12.2	1.7	1	2	1	2	1	1	1	1	1
2	49	1	161	80	30.863	4	1.45	5.49	92.21	12.11	2.54	1	2	1	2	1	1	1	1	1
2	49	1	162	86	32.7694	4	1.87	4.58	141.02	10.48	1.66	1	2	1	1	2	1	1	2	1
2	49	1	148	72	32.8707	4	1.9	5.49	90.64	9.68	2.37	1	2	1	1	1	1	1	1	1
2	48	1	159	75	29.6665	4	1.27	3.73	109.77	11.81	1.19	1	2	1	2	1	1	1	1	1
1	48	1	168	88	31.1791	4	1.63	4.61	90.46	11.25	1.95	1	2	2	2	2	1	1	2	1
2	48	1	160	80	31.25	4					2.48	1	2	2	1	2	2	2	2	1
1	48	1	165	88	32.3232	4	1.4	4.05	100.12	11.62	1.3	1	2	1	1	2	2	1	2	1
1	48	1	174	98	32.3689	4	1.25	4.4	78.15	9.35	1.09	1	3.98	1	1	1	1	1	1	1
1	47	1	180	91	28.0864	4	1.32	5.1	97.8	11.2	1.9	1	2	2	2	2	2	1	2	1
1	47	1	164	77	28.6288	4	2.27	3.95	129.06	11.78	1.19	1	2	1	1	1	1	1	1	1
2	47	1	157	71	28.8044	4	2.01	6.22	89.84	10.77	7.52	2	2	2	1	2	1	1	2	1
1	47	1	176	90	29.0548	4	1.51	4.23	83.4	9.09	1.44	1	2	2	1	1	2	2	1	1
2	47	1	157	72	29.2101	4	1.66	5.43	103.53	10.88	3.58	1	2	2	2	2	1	1	2	1
2	47	1	166	81	29.3947	4	1.5	4.95	80.02	8.83	8.15	2	2	1	1	1	2	1	1	1
2	47	1	171	87	29.7527	4	1.44	4.66	90.52	11.22	2.47	1	2	1	1	1	1	1	1	1
1	47	1	171	89	30.4367	4	1.65	4.73	80.98	11.11	1.67	1	7.33	1	1	1	1	1	1	1
2	47	1	158	76	30.4438	4	1.5	5.11	94.09	12.43	4.51	1	2	1	1	1	1	1	1	1
2	47	1	160	82	32.0312	4	0.95	4.67	92.3	8.09	1.57	1	2	2	2	1	2	1	1	1
1	47	1	175	105	34.2857	4	1.89	4.94	96.1	11.49	1.55	1	2.5	2	1	1	1	1	1	1
1	46	1	178	90	28.4055	4	1.79	4.96	114.77	14.01	1.83	1	2	1	1	1	2	1	1	1
2	46	1	159	72	28.4799	4	1.07				1.94	1	2	1	1	1	1	1	1	1
1	46	1	183	96	28.6661	4	1.48	5.33	114.78	11.23	1.3	1	4.99	2	1	1	1	1	1	1
2	46	1	156	75	30.8185	4	1.6	4.8	111.8	8.85	2.17	1	2	2	2	1	2	2	1	1
2	46	1	150	70	31.1111	4	1.54	4.46	80.83	9.4	3.43	1	2.84	2	1	1	1	1	1	1
2	46	1	153	73	31.1846	4	1.81	5.24	108.09	11.23	1.87	1	2	2	1	1	1	1	1	1
2	46	1	167	87	31.1951	4	1.62	4.5	106.51	11.51	3.14	1	2	1	1	1	1	1	1	1
2	46	1	162	84	32.0073	4	1.23	3.61	113.87	11.02	1.49	1	2	1	1	1	1	1	1	1
1	46	1	168	92	32.5964	4					1.34	1	2	1	1	1	1	1	1	1
1	46	1	171	112	38.3024	4	1.49	4.71	90.72	9.21	1.9	1	2	2	1	2	2	2	2	1
2	46	1	158	98	39.2565	4	1.47	4.55	95.32	12.37	3.35	1	2	1	1	1	1	1	1	1
2	46	1	162	110	41.9143	4	1.77	5.09	127.06	8.99	2.96	1	2	2	1	1	1	1	1	1
2	45	1	153	66	28.1943	4	1.74	4.82	113.28	10.91	1.87	1	2	1	2	1	2	1	1	1
2	45	1	162	74	28.1969	4	1.64	5.14	108.64	11.11	1.11	1	2	1	2	1	2	2	1	1
1	45	1	174	86	28.4053	4	1.35	4.81	93.79	9.6	2.36	1	2	1	2	1	1	1	1	1
2	45	1	158	71	28.441	4	2.01	5.55	130.74	12.41	4.19	1	2	2	1	1	2	1	1	1
2	45	1	165	80	29.3848	4	1.24	4.88	106.38	13.45	1.63	1	2	2	2	1	2	1	1	1
1	45	1	174	89	29.3962	4	1.72	4.53	120.99	12.14	1.32	1	2	1	2	1	2	1	1	1
1	45	1	167	83	29.7608	4					7.48	2	2	1	1	1	1	1	1	1
2	45	1	162	83	31.6263	4	1.64	4.13	120.14	10.02	0.7	1	2	1	2	1	1	1	1	1
2	45	1	159	80	31.6443	4	1.27	4.21	98.55	11.67	0.96	1	2	2	1	2	2	1	2	1
2	44	1	159	71	28.0843	4	1.88	4.95	86.07	10.27	1.65	1	2	2	1	1	2	1	1	1
2	44	1	166	78	28.306	4					1.37	1	2	1	2	1	1	1	1	1
1	44	1	157	70	28.3987	4	1.45	4.53	95.03	9.68	1.47	1	2	1	1	1	1	1	1	1
2	44	1	155	69	28.7201	4	1.23	3.38	64.88	9.44	0.99	1	2	1	1	1	2	1	1	1
2	44	1	159	73	28.8754	4	1.95	5.85	92.81	9.52	1.76	1	2	1	2	1	1	1	1	1
2	44	1	160	74	28.9062	4	1.33	4.9	93.38	10.9	0.82	1	2	1	2	1	2	1	1	1
1	44	1	174	88	29.0659	4	1.73	4.79	96.9	10.56	0.59	1	2	1	1	1	1	1	1	1
1	44	1	173	87	29.0688	4	1.35	5.59	78.4	9.98	1.18	1	2.71	1	1	1	1	1	1	1
1	44	1	165	80	29.3848	4	1.59	5.37	86.96	10.84	2.11	1	2	2	2	1	2	1	1	1
2	44	1	158	74	29.6427	4	2.03	4.42	74.86	9.44	1.48	1	2	1	1	1	1	1	1	1
2	44	1	165	81	29.7521	4	1.67	4.3	157.73	13.51	3.37	1	2	2	2	2	1	1	2	1
1	44	1	169	86	30.111	4	1.93	5.75	116.3	10.64	1.35	1	2.4	1	2	1	1	1	1	1
2	44	1	164	81	30.116	4	1.06				0.94	1	2	2	1	1	2	1	1	1
2	44	1	159	78	30.8532	4	1.51	3.99	116.04	13.39	3.28	1	2	1	2	1	1	1	1	1
1	44	1	166	86	31.2092	4	1.52	5.08	107.95	11.85	1.22	1	2.84	1	1	1	1	1	1	1
2	44	1	160	81	31.6406	4	1.15	4.87	93.04	10.54	0.49	1	2	2	1	1	1	1	1	1
2	44	1	165	88	32.3232	4	1.67	4.05	87.47	9.24	2.82	1	2	1	2	1	1	1	1	1
1	44	1	170	103	35.6401	4					2.21	1	2	2	2	1	2	2	1	1
2	44	1	158	98	39.2565	4	1.74	4.57	116.77	12.63	2.11	1	2	2	1	1	2	1	1	1
2	43	1	157	70	28.3987	4					2.93	1	2	1	2	1	1	1	1	1
2	43	1	159	73	28.8754	4	1.2	3.85	82.57	8.89	2.12	1	2	2	2	2	2	2	2	1
2	43	1	160	74	28.9062	4	1.46	3.89	84.84	8.25	1.2	1	2	1	2	1	1	1	1	1
2	43	1	160	74	28.9062	4	1.5	5	87	11.41	3.35	1	2	1	1	1	1	1	1	1
2	43	1	161	76	29.3199	4	1.52	4.54	102.93	7.81	1.64	1	2	2	1	1	1	1	1	1
1	43	1	172	87	29.4078	4	1.84	4.52	104.01	12.22	2.79	1	2	2	2	1	2	2	1	1
1	43	1	176	94	30.3461	4	1.23	4.31	83.21	11.26	1.32	1	2	1	1	1	1	1	1	1
2	43	1	155	73	30.385	4	1.1	4.37	92.63	11.23	3.39	1	2	2	1	1	1	1	1	1
2	43	1	156	74	30.4076	4	1.39	4.54	113.51	13.28	2.59	1	2	1	2	1	2	1	1	1
2	43	1	156	74	30.4076	4	1.68	3.72	99.73	11.02	1.72	1	2	1	1	1	1	1	1	1
1	43	1	172	90	30.4218	4	1.43	4.6	112.99	13.38	2.08	1	2	2	1	1	2	1	1	1
2	43	1	161	80	30.863	4	1.73	5.08	104.73	11.13	7.08	2	2	1	1	1	1	1	1	1
2	43	1	154	75	31.6242	4	1.53	4.38	94.44	10	1.74	1	2	1	1	1	1	1	1	1
2	43	1	170	96	33.218	4	1.56	4.89	125.52	12.73	4.06	1	2	2	2	2	2	1	2	1
2	43	1	159	85	33.6221	4	1.69	4.92	89.58	11.52	5.88	2	2	2	1	1	2	1	1	1
2	43	1	161	92	35.4925	4	1.63	4.58	108.56	10.18	1.94	1	2	1	1	1	1	1	1	1
2	43	1	165	103	37.8329	4	1.28	5.02	103.74	11.52	2.56	1	2	2	2	2	2	2	2	1
2	42	1	169	80	28.0102	4	1.03	3.53	93.93	10.04	2.25	1	2	2	1	1	2	1	1	1
2	42	1	170	81	28.0277	4	1.7	5.06	88.8	9.19	5.69	2	2	2	1	1	2	2	1	1
2	42	1	162	74	28.1969	4	1.62	5.26	81.66	10.91	2.83	1	2	1	1	1	2	1	1	1
2	42	1	158	71	28.441	4	2	4.73	87.7	10.17	1.6	1	2	2	2	1	1	1	1	1
2	42	1	163	77	28.9811	4	1.75	3.93	111.26	11.01	2.73	1	2	2	1	1	1	1	1	1
2	42	1	164	79	29.3724	4	1.84	4.49	167.17	13.32	2.72	1	2	1	1	1	1	1	1	1
1	42	1	165	80	29.3848	4					1.7	1	2	2	1	1	1	1	1	1
2	42	1	156	73	29.9967	4	1.5	4.75	118.65	12.58	1.23	1	2	1	2	1	2	1	1	1
2	42	1	154	73	30.7809	4	1.36	3.98	93.89	12.99	2.34	1	2	2	1	1	2	1	1	1
1	42	1	179	104	32.4584	4	1.56	4	105.92	11.8	1.45	1	2	1	1	1	1	1	1	1
2	42	1	153	79	33.7477	4	1.82	3.92	105.59	10.31	2.41	1	2	2	2	1	1	1	1	1
2	42	1	150	79	35.1111	4	1.54	4.54	103.56	9.72	1.27	1	2	1	2	2	2	1	2	1
2	42	1	159	95	37.5776	4	1.64	4.71	99.48	13.07	3.58	1	2	1	1	1	1	1	1	1
1	41	1	170	82	28.3737	4	1.63	6.04	86.03	11.13	1.04	1	7.26	2	2	2	2	2	2	1
2	41	1	149	65	29.278	4	1.37	4.66	110.97	11.76	3.14	1	2	2	1	1	2	2	1	1
2	41	1	160	75	29.2969	4	1.36	5.38	92.45	10.79	0.73	1	2	1	2	2	2	1	2	1
2	41	1	160	77	30.0781	4	1.22	3.93	80.35	8.29	3.11	1	2	1	2	1	2	2	1	1
2	41	1	162	80	30.4832	4	1.51	4.04	99.1	9.88	6.07	2	2	1	1	1	1	1	1	1
1	41	1	168	89	31.5334	4	1.86	6	92.78	10.83	1.59	1	2.44	1	1	1	1	1	1	1
2	41	1	151	74	32.4547	4	1.08	4.91	85.99	11.62	1.36	1	2	2	2	1	1	1	1	1
2	41	1	154	82	34.5758	4	1.65	5.01	85.83	12.07	2.14	1	2	1	2	1	2	1	1	1
1	40	1	175	86	28.0816	4	1.77	5.67	90.81	9.29	0.77	1	2	1	1	1	1	1	1	1
1	40	1	171	83	28.3848	4	1.67	4.91	112.5	14.92	3.95	1	2	2	2	1	2	1	1	1
2	40	1	164	77	28.6288	4	1.78	3.95	83.37	9.52	2.48	1	2	1	1	1	1	1	1	1
1	40	1	175	91	29.7143	4					1.12	1	5.74	1	2	1	2	1	1	1
1	40	1	173	90	30.0712	4	1.66	4.96	110.21	10.04	2.18	1	2	1	1	1	2	1	1	1
1	40	1	177	97	30.9617	4	1.42	4.34	102.86	9.94	0.4	1	2	2	1	1	1	1	1	1
2	40	1	163	85	31.9922	4	1.47	5.2	101.72	11.39	1.2	1	2	1	1	1	1	1	1	1
1	40	1	185	110	32.1402	4	1.06	4.17	74.53	9.87	3.1	1	2	2	1	2	2	2	2	1
2	40	1	161	85	32.7919	4	1.55	4.63	96.85	9.29	4.35	1	2	1	2	2	2	1	2	1
2	40	1	154	85	35.8408	4	1.81	5.01	82	7.66	6.98	2	2	1	1	1	1	1	1	1
1	39	1	170	81	28.0277	4	1.47	4.67	97.54	9.83	2.03	1	2	1	1	1	2	1	1	1
2	39	1	154	67	28.251	4	1.24	4.48	103.67	11.13	1.44	1	2	2	1	1	2	2	1	1
2	39	1	156	73	29.9967	4	1.39	3.96	88.87	10.21	3.92	1	2	1	1	1	2	1	1	1
2	39	1	157	76	30.8329	4	2.06	6.13	121.99	13.01	1.56	1	2	1	2	1	2	1	1	1
1	39	1	178	100	31.5617	4	1.37	3.54	70.46	7.59	2.04	1	2	1	2	2	2	1	2	1
1	39	1	173	97	32.41	4	1.32	5.16	71.2	8.05	2.51	1	2	2	1	1	1	1	1	1
1	39	1	159	83	32.831	4	1.58	4.64	89.08	12.1	1.08	1	2.02	2	2	1	2	1	1	1
1	39	1	166	95	34.4753	4	1.37	4.68	77.18	9.5	1.84	1	8.61	1	1	2	1	1	2	1
2	39	1	172	108	36.5062	4	1.27	3.27	91.43	9.94	1.76	1	2	2	2	1	1	1	1	1
2	38	1	156	69	28.3531	4	1.5	6.34	96.24	11.88	1.01	1	2	2	2	1	2	1	1	1
1	38	1	176	88	28.4091	4	2.17	5.29	62.01	8.06	0.67	1	2.46	2	1	1	2	2	1	1
2	38	1	150	66	29.3333	4					2.36	1	2	1	1	1	2	2	1	1
1	38	1	171	90	30.7787	4	1.98	4.86	94.7	11.3	1.51	1	2	2	1	1	1	1	1	1
1	38	1	170	89	30.7958	4	1.69	5.01	115.68	12.52	3.67	1	3.13	1	2	1	1	1	1	1
2	38	1	172	97	32.788	4	1.52	4.58	82.81	9.77	1.16	1	2	1	1	1	1	1	1	1
2	37	1	158	71	28.441	4	1.59	4.47	95.24	10.57	0.7	1	2	1	2	1	1	1	1	1
2	37	1	164	78	29.0006	4	1.44	4.75	91.18	9.41	1.77	1	2	1	1	1	1	1	1	1
1	37	1	179	93	29.0253	4	1.71	4.05	109.8	9.95	1.27	1	2	1	1	1	1	1	1	1
2	37	1	160	76	29.6875	4	1.28	4.05	88.62	10.83	1.22	1	2	2	2	1	1	1	1	1
1	37	1	180	97	29.9383	4	1.88	5.46	111.97	9.1	2.93	1	2	2	2	1	2	1	1	1
1	37	1	169	89	31.1614	4	1.57	2.69	109.79	14.36	0.91	1	2	1	1	1	1	1	1	1
1	37	1	171	111	37.9604	4	1.2	6.1	104.2	11.3	2.1	1	2	2	2	1	1	1	1	1
2	36	1	164	78	29.0006	4	1.47	5.32	96.45	11.2	1.81	1	2	2	2	1	1	1	1	1
1	36	1	174	88	29.0659	4	1.67	4.64	87.43	12.63	2.52	1	2	1	1	1	1	1	1	1
2	36	1	154	69	29.0943	4	2.07	4.9	106.7	10.97	5.64	2	2	2	1	1	2	1	1	1
2	36	1	165	80	29.3848	4	1.46	5.08	89.85	9.96	2.41	1	2	1	1	1	2	1	1	1
1	36	1	163	80	30.1103	4	1.59	5.16	92.72	10.27	2.65	1	2	2	1	1	1	1	1	1
1	36	1	172	90	30.4218	4	1.37	4.91	121.06	11.96	3.45	1	2	2	2	1	1	1	1	1
2	36	1	157	75	30.4272	4	1.96	5.77	119.05	11.3	0.8	1	2	1	1	1	2	1	1	1
2	36	1	161	79	30.4772	4					1.02	1	2	1	1	1	2	1	1	1
2	36	1	156	75	30.8185	4					2.23	1	2	1	2	1	2	1	1	1
2	35	1	171	82	28.0428	4	1.69	4.71	120.27	11.12	1.75	1	2	1	2	1	2	1	1	1
2	35	1	156	72	29.5858	4					1.31	1	2	1	2	1	2	2	1	1
1	35	1	177	93	29.685	4	1.39	5.18	110.72	11.23	2.39	1	2	2	2	1	2	1	1	1
1	35	1	175	91	29.7143	4	1.35	4.45	100.32	11.33	1.6	1	2	1	2	1	2	1	1	1
1	35	1	180	100	30.8642	4	1.42	4.21	125.13	14.65	1.83	1	2	1	1	1	1	1	1	1
1	35	1	186	129	37.2875	4	1.89	5.56	132.54	10.63	1.87	1	2	1	2	1	1	1	1	1
2	35	1	146	80	37.5305	4	1.99	5.51	117.56	12.76	5.09	2	2	2	2	1	2	1	1	1
2	34	1	172	83	28.0557	4					2.28	1	2	2	2	1	1	1	1	1
2	34	1	171	84	28.7268	4	2.68	6.29	154.91	17.61	0.14	1	2	1	1	1	1	1	1	1
1	34	1	173	87	29.0688	4	1.83	5.4	109.66	12.57	1.35	1	2.29	2	2	1	2	1	1	1
2	34	1	148	68	31.0446	4	1.44	4.95	87.22	9.72	1.2	1	2	1	2	1	2	1	1	1
1	34	1	172	94	31.7739	4	1.54	4.13	106.76	11.88	1.74	1	2	2	1	1	2	2	1	1
1	34	1	167	90	32.2708	4	1.78	4.73	85.52	9.51	2.32	1	2.3	2	1	1	1	1	1	1
2	34	1	176	107	34.5429	4	1.22	3.66	84.18	9.99	3.4	1	2	1	2	2	1	1	2	1
1	33	1	172	89	30.0838	4	2.02	6.1	103.16	11.61	2.54	1	2	1	1	1	2	1	1	1
1	33	1	183	103	30.7564	4	1.74	6.28	91.39	14.19	1.78	1	2.08	2	1	1	2	1	1	1
2	33	1	163	82	30.863	4	1.5	4.41	99.72	12.1	1.81	1	2	1	1	1	1	1	1	1
2	33	1	165	86	31.5886	4	1.58	3.67	98.06	10.61	2.94	1	2	2	1	1	2	2	1	1
2	33	1	157	79	32.05	4					0.92	1	2	1	2	1	2	1	1	1
1	33	1	183	119	35.5341	4	1.44	5.07	78.95	12.25	2.18	1	8.86	2	2	1	1	1	1	1
1	32	1	172	84	28.3937	4	1.55	4.91	102.24	11.73	1.43	1	2	2	1	1	1	1	1	1
1	32	1	177	91	29.0466	4	1.28	4.39	102.17	13.18	2.04	1	2	1	2	1	1	1	1	1
1	32	1	189	106	29.6744	4					2.05	1	2	1	1	1	1	1	1	1
2	32	1	165	92	33.7925	4	1.11	4.96	71.64	11.05	2.37	1	2	1	2	1	1	1	1	1
1	32	1	184	116	34.2628	4	1.89	5.03	114.23	15.49	1.46	1	2	2	2	1	2	1	1	1
2	32	1	160	104	40.625	4	1.99	6.19	109.96	11.98	3.28	1	2	2	1	1	1	1	1	1
1	31	1	179	90	28.089	4	1.61	5.08	105.07	12.83	2.56	1	2	1	1	1	2	2	1	1
2	31	1	150	68	30.2222	4	0.96	4.72	95.77	12.23	1.52	1	2.52	1	2	1	2	1	1	1
1	31	1	179	97	30.2737	4					1.28	1	2	1	2	1	1	1	1	1
2	31	1	168	87	30.8248	4	1.74	4.38	97.91	10.14	0.83	1	2	1	1	1	1	1	1	1
2	31	1	166	96	34.8381	4	1.46	4.75	125.3	11.89	2.02	1	5.29	1	2	1	1	1	1	1
1	31	1	182	147	44.3787	4	1.47	6	79.09	9.89	1.89	1	2.01	2	1	1	2	1	1	1
2	30	1	168	80	28.3447	4	1.33	5.03	89.59	9.85	4	1	2	2	2	1	2	1	1	1
2	30	1	160	75	29.2969	4	1.87	4.67	89.85	11.22	6.84	2	2	2	1	1	2	1	1	1
1	30	1	182	98	29.5858	4	1.39	4.48	90.18	12.53	0.57	1	2	2	2	1	2	2	1	1
1	30	1	172	91	30.7599	4	2.29	6.09	118.61	13.73	0.06	1	3.2	1	1	1	2	1	1	1
1	30	1	179	106	33.0826	4	1.57	5.34	89.01	11.11	3.39	1	2	1	1	1	1	1	1	1
1	30	1	180	108	33.3333	4	1.54	5.03	99.88	11.48	5.38	2	2	2	2	1	2	1	1	1
2	30	1	156	85	34.9277	4	1.73	5.99	93.05	11.49	1.19	1	2	1	1	1	1	1	1	1
1	30	1	187	169	48.3285	4	1.83	5.01	87.35	11.82	0.45	1	2	2	1	1	1	1	1	1
2	29	1	167	79	28.3266	4	1.42	4.82	88.85	11.44	4.38	1	2	1	1	1	2	1	1	1
1	29	1	177	96	30.6425	4	1.32	4.64	87.78	9.62	1.01	1	2	2	2	1	2	1	1	1
1	29	1	170	96	33.218	4	1.73	5.95	101.94	13.72	1.6	1	2.27	2	1	1	1	1	1	1
2	29	1	165	92	33.7925	4	1.62	3.99	94.4	9.01	3.85	1	2	2	2	2	2	2	2	1
1	29	1	170	104	35.9862	4	1.98	5.71	95.47	10.56	1.88	1	2	1	1	1	1	1	1	1
1	29	1	179	153	47.7513	4	1.96	4.12	85.91	9	2.15	1	2	2	1	1	1	1	1	1
1	28	1	185	97	28.3419	4	1.65	5.69	94.22	11.14	5.32	2	2	1	1	2	2	2	2	1
2	28	1	154	69	29.0943	4	1.56	4.93	89.76	12.87	2.93	1	2	1	2	1	2	2	1	1
1	28	1	186	101	29.1941	4	1.61	5.03	101.98	12.62	2.24	1	2.64	1	1	1	2	1	1	1
2	28	1	160	77	30.0781	4	1.56	4.48	84.07	9.5	4.48	1	2	2	1	2	2	1	2	1
1	28	1	172	91	30.7599	4	1.91	7.55	106.62	17.68	10.02	2	2	2	1	1	2	1	1	1
2	28	1	158	84	33.6485	4	1.94	4.92	115.94	13.81	4.85	1	2	1	1	1	2	2	1	1
1	28	1	169	102	35.713	4	1.89	5.35	111.18	11.61	2.22	1	2	1	1	1	2	1	1	1
1	27	1	175	91	29.7143	4	1.99	6.01	83.92	11.7	2.58	1	2	2	1	1	2	1	1	1
1	27	1	175	121	39.5102	4	1.72	5.21	123.99	11.6	2.56	1	2	1	1	1	2	1	1	1
2	26	1	158	71	28.441	4	1.78	4.99	92.08	11.97	0.69	1	2	2	1	2	1	1	2	1
1	26	1	184	120	35.4442	4	1.64	4.72	104.44	11.92	1.16	1	2	2	1	1	2	1	1	1
2	25	1	163	76	28.6048	4	1.38	4.87	118.71	11.57	2.3	1	2	2	2	1	2	1	1	1
1	25	1	177	94	30.0041	4	1.84	4.46	108.77	10.91	1.9	1	4.87	2	2	1	1	1	1	1
2	25	1	165	87	31.9559	4	1.39	4.04	93.14	10.49	3.38	1	2	1	1	1	1	1	1	1
1	25	1	168	91	32.2421	4	1.8	5.54	117.21	11.5	2.19	1	4.09	2	2	1	2	1	1	1
1	24	1	182	101	30.4915	4	1.98	6.81	106.93	13.53	1.69	1	4.06	1	1	1	1	1	1	1
1	22	1	179	97	30.2737	4	1.52	5.24	81.47	10.74	2.17	1	2.51	1	2	1	2	1	1	1
1	21	1	180	113	34.8765	4	1.7	5.47	109.7	13.82	1.77	1	2	1	1	1	2	1	1	1
2	20	1	166	96	34.8381	4	1.31	1.08	86.36	9.34	2.28	1	2	1	1	1	2	1	1	1
2	53	1	155	58	24.1415	3	1.51	4.62	90.31	8.33	4.54	1	2	1	1	1	1	1	1	1
2	53	1	160	62	24.2188	3	1.41	3.58	94.18	9.42	4.45	1	2	2	1	2	2	2	2	1
2	53	1	170	70	24.2215	3	2.18	4.44	124.26	13.73	0.98	1	2	1	1	1	1	1	1	1
2	53	1	165	66	24.2424	3	1.93	4.91	78.86	9.44	4.19	1	2	2	2	1	2	1	1	1
2	53	1	145	52	24.7325	3	1.37	5.3	93.34	12.14	1.08	1	2	2	1	1	1	1	1	1
2	53	1	157	61	24.7475	3	1.11	4.21	106.05	11.84	1.59	1	2	2	2	1	1	1	1	1
2	53	1	162	65	24.7676	3	1.53	5.3	70.86	7.85	2.08	1	2	1	2	1	1	1	1	1
2	53	1	151	57	24.9989	3	1.78	4.92	132.39	14.83	1.81	1	2	2	1	2	2	2	2	1
2	53	1	167	70	25.0995	3	1.79	4.45	110.55	11.28	2.94	1	2	1	1	1	2	1	1	1
2	53	1	154	60	25.2994	3	1.87	6.62	115.5	8.16	1.98	1	2	2	1	1	1	1	1	1
2	53	1	161	66	25.462	3	1.72	4.69	133.02	12.84	5.58	2	2	1	2	1	1	1	1	1
2	53	1	156	62	25.4767	3	1.34	5.04	121.08	14	2.23	1	2	1	1	1	2	1	1	1
2	53	1	159	65	25.711	3	1.43	4.98	104.12	12.55	0.68	1	2	2	2	1	2	1	1	1
2	53	1	160	66	25.7812	3	1.61	4.95	109.71	10.82	1.89	1	2	2	1	1	1	1	1	1
2	53	1	160	66	25.7812	3	1.21	3.97	96.4	11.02	0.87	1	2	1	1	1	1	1	1	1
2	53	1	162	68	25.9107	3	1.64	4.38	91.79	10.57	1.24	1	2	2	2	2	1	1	2	1
2	53	1	167	73	26.1752	3	1.93	3.75	97.05	10	8.3	2	2	2	2	1	1	1	1	1
2	53	1	155	63	26.2227	3	1.73	5.03	83.68	10.68	3.96	1	2	2	1	1	1	1	1	1
2	52	1	159	67	26.5021	3	1.34	3.31	82.17	9.07	2	1	2	1	2	1	1	1	1	1
2	52	1	156	65	26.7094	3	1.84	4.31	108.33	12.36	2.15	1	2	2	1	2	1	1	2	1
2	52	1	159	68	26.8977	3	1.51	4.42	96.72	11.72	2.21	1	2	2	1	1	1	1	1	1
2	52	1	171	79	27.0169	3	1.46	4.66	88.37	9.1	2.89	1	2	1	1	1	1	1	1	1
2	51	1	167	67	24.0238	3	1.04	3.64	92.55	12.14	3.49	1	2	1	2	1	2	1	1	1
2	51	1	158	60	24.0346	3	1.62	5.32	106.83	10.87	1.49	1	2	1	1	1	2	1	1	1
1	51	1	177	76	24.2587	3	1.37	4.41	108.61	12.37	0.46	1	2	1	2	1	1	1	1	1
2	51	1	166	67	24.3141	3	1.48	4.22	89.56	11.32	3.07	1	2	1	2	1	1	1	1	1
2	51	1	157	60	24.3418	3	1.49	4.15	101.74	9.26	0.19	1	2	1	1	2	2	1	2	1
2	51	1	168	69	24.4473	3	1.42	5.36	125.65	11.04	4.79	1	3.81	2	1	1	2	2	1	1
1	51	1	175	75	24.4898	3	1.79	5.05	114.77	14.24	1.91	1	2	1	2	1	1	1	1	1
1	51	1	170	71	24.5675	3	1.36	4.09	81.74	11.67	1.72	1	5.42	2	1	1	2	2	1	1
2	51	1	156	60	24.6548	3	1.5	4.25	97.62	9.79	4.52	1	2	1	1	2	1	1	2	1
2	51	1	156	60	24.6548	3	1.61	4.24	102.99	9.15	2.48	1	2	1	2	1	2	2	1	1
2	51	1	156	60	24.6548	3	1.7	5.44	102.39	10.22	1.6	1	2	2	1	1	1	1	1	1
2	51	1	153	58	24.7768	3	1.79	4.44	106.04	11.62	1.32	1	2	1	1	1	1	1	1	1
2	51	1	169	72	25.2092	3	1.3	3.92	91.26	9.74	2.85	1	2	1	2	1	2	1	1	1
1	51	1	169	72	25.2092	3	1.45	4.45	86.66	11.27	1.64	1	2	1	1	1	2	1	1	1
2	51	1	163	67	25.2174	3	1.01		70.18		2.88	1	2	1	1	1	1	1	1	1
2	51	1	159	64	25.3155	3	2.01	4.61	109.54	10.62	3.29	1	2	1	1	2	1	1	2	1
2	51	1	153	60	25.6312	3	1.23	3.93	85.47	9.7	1.96	1	2	2	2	1	2	2	1	1
2	51	1	160	67	26.1719	3	1.56	3.94	116.55	11.71	1.39	1	2	2	2	1	1	1	1	1
2	51	1	157	65	26.3702	3	2	5.3	93.64	11.22	0.99	1	2	1	2	1	1	1	1	1
2	51	1	158	66	26.4381	3	1.29	3.84	89.22	9.21	4.56	1	2	2	1	2	1	1	2	1
1	51	1	175	81	26.449	3	1.41	5.11	89.04	12.1	7.08	2	2	1	1	2	2	1	2	1
2	51	1	166	73	26.4915	3	1.66	4.53	89.79	12.09	5.06	2	2	1	1	1	1	1	1	1
2	51	1	156	65	26.7094	3	1.64	5.02	105.34	11.33	0.54	1	2	2	1	1	1	1	1	1
2	51	1	152	62	26.8352	3	1.37	4.24	121.1	11.12	1.11	1	2	1	1	1	1	1	1	1
2	51	1	167	75	26.8923	3	1.38	4.73	86.78	11.02	3.54	1	2	1	1	1	1	1	1	1
2	51	1	161	70	27.0051	3	1.31	3.7	68.17	8.98	1.77	1	2	2	1	2	2	2	2	1
2	51	1	161	70	27.0051	3	1.78	5.25	117.2	12.134	2.1	1	2	1	1	1	1	1	1	1
2	51	1	167	76	27.2509	3					7.9	2	2	2	2	1	2	2	1	1
2	51	1	163	73	27.4756	3	1.59	4.6	90.22	10.7	4.89	2	2	1	1	1	1	1	1	1
2	51	1	159	70	27.6888	3	1.49	3.99	110.49	11.03	0.86	1	2	1	1	1	1	1	1	1
2	50	1	156	59	24.2439	3	1.43	3.75	105.81	10.69	1.6	1	2	1	1	1	1	1	1	1
2	50	1	167	68	24.3824	3	1.27	4.39	99.96	11.61	4.13	1	2	1	1	2	1	1	2	1
2	50	1	164	66	24.539	3	1.19	3.87	98.39	12.58	2.45	1	2	1	1	1	1	1	1	1
2	50	1	162	65	24.7676	3	1.4	4.59	88.13	11.37	5.09	2	2	1	2	2	1	1	2	1
2	50	1	162	65	24.7676	3	1.5	4.43	118.99	14.65	1.8	1	2	1	1	1	2	1	1	1
2	50	1	163	67	25.2174	3	1.55	3.65	114.42	10.95	1.69	1	2	2	1	1	1	1	1	1
1	50	1	173	76	25.3934	3	1.7	4.95	107.57	11.01	2.61	1	2	2	1	1	2	1	1	1
2	50	1	159	65	25.711	3	1.34	4.73	97.98	11.99	1.87	1	2	1	1	1	1	1	1	1
2	50	1	157	64	25.9645	3	1.93	4.69	93.03	10.07	1.6	1	2	1	1	1	2	1	1	1
2	50	1	150	59	26.2222	3	1.14	3.66	110.62	10.95	1.94	1	2	2	1	1	1	1	1	1
1	50	1	172	78	26.3656	3	1.25	4.81	79.41	9.64	5.52	2	2	2	1	1	1	1	1	1
1	50	1	173	79	26.3958	3	1.11	3.88	95.27	11.55	1.75	1	2	1	1	1	1	1	1	1
2	50	1	166	73	26.4915	3	2.11	4.03	129.33	11.27	1.25	1	2	2	1	1	1	1	1	1
2	50	1	161	69	26.6193	3	1.41	4.71	90.54	9.19	2.11	1	2	2	1	1	1	1	1	1
1	50	1	172	79	26.7036	3	1.38	4.96	97.33	11.59	1.87	1	2	1	2	1	2	1	1	1
2	50	1	156	65	26.7094	3	1.38	4.91	97.26	10.82	2.42	1	2	1	1	1	1	1	1	1
2	50	1	157	66	26.7759	3	1.27	4.32	88.12	9.4	2.73	1	2	1	1	1	1	1	1	1
1	50	1	165	73	26.8136	3	1.25	4.25	80.67	9.41	1.1	1	2	1	2	1	1	1	1	1
1	50	1	170	78	26.9896	3	1.81	4.45	108.82	12.06	1.39	1	2	1	1	1	2	1	1	1
2	50	1	151	62	27.1918	3	1.54	4.23	118.88	26.85	2.44	1	2	1	1	1	1	1	1	1
2	50	1	158	68	27.2392	3	1.8	5.29	114.09	14.82	1.47	1	2	1	2	1	2	1	1	1
2	50	1	167	76	27.2509	3	1.82	5.18	102.93	18.15	0.03	1	2	1	2	1	2	1	1	1
2	50	1	167	76	27.2509	3	1.39	5.41	90.74	12.08	3.08	1	2	2	1	1	1	1	1	1
2	50	1	152	63	27.268	3	1.25	3.89	153.58	15.98	1.13	1	2	1	1	1	1	1	1	1
2	50	1	169	78	27.31	3	2.11	4.47	105.98	10.98	0.56	1	2	2	1	1	2	1	1	1
2	50	1	153	65	27.7671	3	1.35	3.73	111.93	8.85	5.4	2	2	1	1	1	1	1	1	1
1	50	1	181	91	27.7769	3	1.85	4.76	123.41	15.12	2.71	1	2	2	2	1	2	1	1	1
2	49	1	163	64	24.0882	3	1.54	5.09	84.23	9.64	2.25	1	2	2	1	2	2	1	2	1
2	49	1	152	56	24.2382	3	1.42	4	87.7	10.85	2.23	1	2	1	1	1	1	1	1	1
2	49	1	166	67	24.3141	3	1.48	5.32	90.71	10.27	1	1	2	1	1	1	1	1	1	1
2	49	1	167	68	24.3824	3	1.37	5.05	92.05	10.14	3.09	1	2	2	1	1	1	1	1	1
2	49	1	163	66	24.841	3	1.24	3.96	92.07	9.81	5.76	2	2	2	1	1	2	1	1	1
2	49	1	165	68	24.977	3	1.24	4.6	83.48	12.49	0.89	1	2	2	2	2	1	1	2	1
2	49	1	176	78	25.1808	3	1.22	3.91	91.78	13.27	1.45	1	2	1	1	1	2	1	1	1
2	49	1	160	65	25.3906	3	1.26	4.96	105.3	11.82	1.11	1	2	1	1	2	1	1	2	1
2	49	1	166	70	25.4028	3	1.58	4.13	105.12	12.13	2.03	1	2	2	2	1	2	1	1	1
2	49	1	159	65	25.711	3	1.15	4.59	127.21	12.22	0.87	1	2	1	1	1	2	1	1	1
2	49	1	165	70	25.7117	3	1.54	4.92	94.67	9.33	2.22	1	2	1	1	1	1	1	1	1
1	49	1	174	78	25.763	3	1.28	5.28	84.94	11.69	0.73	1	2	1	1	1	1	1	1	1
2	49	1	163	69	25.9701	3	1.69	4.53	121.92	13	4.98	2	2	2	1	1	2	2	1	1
1	49	1	173	78	26.0617	3	1.48	4.93	97.03	10.24	2.26	1	3.22	2	2	1	2	1	1	1
2	49	1	165	71	26.079	3	1.65	5.54	8.96	10.63	3.76	1	2	1	1	1	1	1	1	1
2	49	1	167	73	26.1752	3	1.64	4.11	117.21	9.23	1.34	1	2	2	1	1	1	1	1	1
2	49	1	162	69	26.2917	3					1.45	1	2.64	2	1	2	1	1	2	1
2	49	1	162	69	26.2917	3	1.56	4.08	89.06	9.23	3.17	1	2	1	2	1	1	1	1	1
1	49	1	193	98	26.3094	3	1.14	4.84	99.61	11.83	1.38	1	2	1	1	2	2	1	2	1
1	49	1	171	77	26.3329	3	1.94	5.47	89.34	11.12	0.87	1	2	1	2	1	1	1	1	1
2	49	1	167	74	26.5338	3	1.14	3.47	98.38	11.52	2.92	1	2	1	2	1	2	1	1	1
1	49	1	161	69	26.6193	3	1.5	5.38	71.83	9.18	4.78	1	3.55	1	1	1	1	1	1	1
1	49	1	178	85	26.8274	3					1.12	1	4.76	2	2	1	1	1	1	1
2	49	1	158	67	26.8386	3	1.79	4.14	101.22	12.6	4.42	1	2	2	1	1	1	1	1	1
2	49	1	161	71	27.3909	3	1.51	4.54	89.2	10.89	4.28	1	2	1	2	2	1	1	2	1
1	49	1	180	90	27.7778	3					2.43	1	2	1	2	1	1	1	1	1
2	48	1	168	68	24.093	3	2.27	7.61	108.9	18.59	0.02	1	2	1	1	1	1	1	1	1
2	48	1	153	58	24.7768	3	1.4	5.28	102.99	10.77	1.38	1	2	1	1	2	1	1	2	1
2	48	1	154	59	24.8777	3	1.9	4.44	104.75	8.69	1.13	1	2	2	1	1	1	1	1	1
1	48	1	147	54	24.9896	3	1.69	4.38	109.7	11.64	2.33	1	2	1	1	1	1	1	1	1
2	48	1	160	64	25	3	1.35	4	85.34	9.57	2.53	1	2	2	2	1	2	1	1	1
1	48	1	170	74	25.6055	3	1.49	4.85	100.22	13.41	1.88	1	2.1	1	1	1	1	1	1	1
2	48	1	155	62	25.8065	3	1.43	4.79	94.47	10.35	2.39	1	2	2	2	2	2	1	2	1
2	48	1	158	65	26.0375	3	1.09				3.97	1	2	1	1	1	1	1	1	1
2	48	1	149	58	26.1249	3	1.39	3.97	100.2	10.31	3.64	1	2	2	2	2	1	1	2	1
2	48	1	164	71	26.398	3	1.7	4.96	107.23	10.77	0.52	1	2	1	2	1	1	1	1	1
1	48	1	189	96	26.8749	3					1.18	1	2	2	2	1	2	2	1	1
2	48	1	159	68	26.8977	3	1.56	4.69	97.7	8.64	4.29	1	2	1	1	1	1	1	1	1
2	48	1	159	69	27.2932	3	1.45	3.69	76.48	9.06	2.39	1	2	1	1	1	1	1	1	1
2	48	1	169	78	27.31	3	1.23	4.15	75.33	9.08	2.73	1	2	1	1	1	1	1	1	1
2	48	1	156	67	27.5312	3	1.68	4.93	112.92	15.45	3.33	1	2	1	1	1	1	1	1	1
2	48	1	165	75	27.5482	3	1.43	4.44	108.61	10.1	2.55	1	2	1	1	1	1	1	1	1
2	48	1	165	75	27.5482	3	1.46	4.34	93.38	13.07	2.48	1	2	1	1	1	1	1	1	1
2	48	1	159	70	27.6888	3	1.57	4.79	93.47	10.85	1.1	1	2	2	1	1	2	1	1	1
1	48	1	173	83	27.7323	3	1.2	4.06	103.93	11.14	1.27	1	2	1	1	1	1	1	1	1
2	48	1	163	74	27.852	3	1.69	5.61	120.59	12.1	3.01	1	2	1	1	1	2	1	1	1
1	48	1	168	79	27.9904	3	1.31	4.75	101.15	11.15	1.62	1	6.16	1	1	1	1	1	1	1
2	47	1	164	65	24.1672	3	1.69	5.94	133.57	14.12	1.78	1	2	2	2	1	2	1	1	1
2	47	1	166	67	24.3141	3	1.28	3.79	85.35	11.08	2.54	1	2	2	1	1	1	1	1	1
2	47	1	160	63	24.6094	3	1.6	4.07	101.56	11.13	3.38	1	2	1	1	2	1	1	2	1
2	47	1	162	65	24.7676	3					2.37	1	2	1	1	1	1	1	1	1
2	47	1	158	63	25.2363	3	1.33	4.27	75.46	9.62	1.77	1	2	1	1	1	1	1	1	1
2	47	1	159	64	25.3155	3	1.52	4.79	115.43	11.58	1.07	1	2	1	1	1	1	1	1	1
2	47	1	160	65	25.3906	3	1.33	4.12	81.71	11.28	1.32	1	2	1	1	1	2	1	1	1
2	47	1	166	70	25.4028	3	1.72	5.02	122.48	11.18	1.98	1	2	1	2	1	1	1	1	1
1	47	1	177	80	25.5354	3	1.6	4.53	95.03	11.98	2.37	1	2	2	1	1	1	1	1	1
1	47	1	177	80	25.5354	3	1.42	4.2	91.01	11.94	1.43	1	2	2	1	1	1	1	1	1
1	47	1	165	70	25.7117	3					0.38	1	2	2	2	1	2	2	1	1
2	47	1	161	67	25.8478	3	1.84	5.08	94.43	10.38	1.88	1	2	1	2	2	2	2	2	1
2	47	1	145	55	26.1593	3	1.73	4.61	117.93	12.81	2.28	1	2.72	1	1	1	1	1	1	1
2	47	1	161	68	26.2336	3	1.46	4.49	134.51	13.29	3.13	1	2	1	1	1	2	1	1	1
1	47	1	172	78	26.3656	3	1.8	4.56	125.47	12.03	3.46	1	3.81	1	2	1	1	1	1	1
2	47	1	156	65	26.7094	3	1.26	3.75	94.79	11.04	2.01	1	2	2	1	2	1	1	2	1
2	47	1	158	67	26.8386	3	1.46	4.76	100.56	12.59	1.45	1	2	1	1	1	2	1	1	1
2	47	1	164	73	27.1416	3	1	4.5	102	12	2.58	1	2	1	1	1	2	1	1	1
2	47	1	163	74	27.852	3	1.64	3.69	90.03	9.62	2.41	1	2	2	1	1	1	1	1	1
1	47	1	157	69	27.993	3	1.64	4.91	103.56	9.84	3.7	1	2	1	1	1	2	2	1	1
2	46	1	159	61	24.1288	3	1.52	4.95	100.44	11.05	2.31	1	2	1	1	1	1	1	1	1
2	46	1	165	66	24.2424	3	1.58	4.81	116.53	10.97	1.16	1	2	1	1	1	2	1	1	1
1	46	1	165	66	24.2424	3	1.59	4.36	133.48	12.88	4.07	1	2	1	1	1	1	1	1	1
1	46	1	181	80	24.4193	3	1.77	4.66	113.86	12.4	1.95	1	2.98	2	2	1	2	2	1	1
2	46	1	159	62	24.5243	3	1.47	4.54	92.42	10.87	3.17	1	2	2	1	2	2	1	2	1
2	46	1	155	59	24.5578	3	1.49	5.79	92.46	9.47	1.39	1	2	1	2	1	2	1	1	1
2	46	1	151	56	24.5603	3	1.16	3.31	65.1	8.19	3.31	1	2	1	1	1	2	1	1	1
2	46	1	165	68	24.977	3	1.49	3.52	96.19	11.73	2.77	1	2	1	1	2	1	1	2	1
2	46	1	163	67	25.2174	3	1.41	3.47	96.78	10.06	4.08	1	2	2	1	1	2	1	1	1
2	46	1	157	63	25.5588	3	1.45	4.77	91.08	10.64	2.62	1	2	1	1	1	1	1	1	1
1	46	1	170	74	25.6055	3	1.53	4.58	92.86	12.63	1.49	1	2	1	1	1	1	1	1	1
1	46	1	165	71	26.079	3	1.23	4.37	73.78	7.77	1.25	1	2	1	2	1	1	1	1	1
1	46	1	169	75	26.2596	3	2	6.2	102.16	12.62	1.4	1	4.22	2	1	1	2	1	1	1
2	46	1	165	72	26.4463	3	1.5	4.97	94.56	9.72	2.67	1	2	1	1	1	1	1	1	1
1	46	1	164	72	26.7698	3	1.44	4.87	103.46	12.35	1.61	1	3.11	1	2	1	1	1	1	1
2	46	1	163	72	27.0993	3	1.4	4.42	77.24	8.63	3.5	1	2	1	1	1	1	1	1	1
2	46	1	157	67	27.1816	3	1.27	3.72	100.3	12.04	0.93	1	2	1	2	1	1	1	1	1
2	46	1	168	77	27.2817	3	1.51	4.82	116.32	12.7	0.69	1	2	1	2	1	1	1	1	1
1	46	1	181	90	27.4717	3	1.49	5.36	89.72	11.9	2.72	1	2	1	1	1	1	1	1	1
2	46	1	160	71	27.7344	3	1.77	5.85	105.4	12.28	2.61	1	2	1	1	1	1	1	1	1
2	46	1	148	61	27.8488	3	1.51	4.7	90.35	10.68	2.72	1	2	1	1	1	1	1	1	1
2	45	1	162	65	24.7676	3	1.44	4.49	87.7	10.91	2.5	1	2	1	1	1	1	1	1	1
1	45	1	168	70	24.8016	3	1.58	4.59	110.28	13.2	2	1	2	2	1	2	2	1	2	1
1	45	1	169	71	24.8591	3	1.34	5.29	93.76	12.43	2.46	1	2	1	2	2	2	1	2	1
2	45	1	155	62	25.8065	3	1.09	5.14	102.79	11.68	1.69	1	2	1	1	1	1	1	1	1
2	45	1	157	64	25.9645	3	1.03	3.99	88.23	11.13	1.57	1	2	1	1	1	1	1	1	1
2	45	1	163	69	25.9701	3	1.48	3.5	98.33	9.9	4.38	1	2	2	1	2	1	1	2	1
1	45	1	172	78	26.3656	3	1.99	4.95	102.74	9.85	2.11	1	2	2	2	1	2	1	1	1
1	45	1	175	81	26.449	3	1.64	5.41	116.05	11.53	1.26	1	2	2	1	1	2	2	1	1
2	45	1	168	77	27.2817	3	1.48	4.61	104.92	12.35	2.08	1	2	1	1	1	1	1	1	1
2	45	1	160	70	27.3438	3	1.66	4.7	87.33	9.84	2.42	1	2	2	2	1	1	1	1	1
1	45	1	171	80	27.3588	3					0.86	1	4.6	1	1	1	1	1	1	1
2	45	1	158	69	27.6398	3	1.58	4.76	107.42	11.61	1.16	1	2	1	2	1	1	1	1	1
2	45	1	160	71	27.7344	3	1.56	4.03	114.5	12.15	1.74	1	2	1	1	1	1	1	1	1
2	45	1	167	78	27.968	3	1.12	4.47	82.15	8.94	2.72	1	2	2	1	1	2	1	1	1
2	44	1	153	57	24.3496	3	1.53	4.27	101.24	10.07	1.2	1	2	1	1	1	1	1	1	1
2	44	1	160	63	24.6094	3	1.44	5.13	109.02	13.45	1.9	1	2	2	2	1	2	1	1	1
2	44	1	152	58	25.1039	3	1.54	4.71	91.48	8.35	3.39	1	2	2	1	1	1	1	1	1
2	44	1	159	64	25.3155	3	1.28	3.68	78.91	9.89	1.39	1	2	1	1	1	1	1	1	1
2	44	1	160	65	25.3906	3	1.44	4.6	67.18	10.23	1.88	1	2	1	1	1	1	1	1	1
2	44	1	157	63	25.5588	3	1.51	4.68	90.88	10.92	3.48	1	2	1	1	1	1	1	1	1
1	44	1	182	85	25.6612	3	1.76	4.38	87.36	11.03	1.14	1	2	1	1	1	1	1	1	1
1	44	1	165	70	25.7117	3	1.15	4.46	73.23	10.48	3.05	1	3.5	1	1	1	1	1	1	1
2	44	1	176	80	25.8264	3	1.19	4.42	92.64	9.07	0.84	1	2	1	1	1	2	1	1	1
2	44	1	151	59	25.8761	3			75.73		2.13	1	2	1	2	1	1	1	1	1
2	44	1	162	68	25.9107	3			66.97		3.26	1	2	2	1	1	2	1	1	1
2	44	1	157	64	25.9645	3	1.25	4.28	109.54	13.45	2.43	1	2	2	2	1	2	1	1	1
2	44	1	166	72	26.1286	3	1.3	3.99	85.16	8.7	1.64	1	2.87	1	1	1	1	1	1	1
1	44	1	176	82	26.4721	3	1.51	5.02	70.89	10.15	1.18	1	2	2	2	1	1	1	1	1
2	44	1	150	60	26.6667	3	1.3	5.5	82.06	9.55	4.04	1	2	1	2	1	1	1	1	1
2	44	1	157	66	26.7759	3	1.34	4.05	95.14	9.61	3.32	1	2	2	2	1	2	1	1	1
2	44	1	158	67	26.8386	3					2.35	1	2	2	1	1	2	1	1	1
2	44	1	160	69	26.9531	3	1.48	4.89	105.52	9.35	2.2	1	2.25	1	1	1	2	1	1	1
1	44	1	185	93	27.1731	3	1.56	4.1	74.39	7.56	4.1	1	2	2	2	1	2	2	1	1
1	44	1	178	87	27.4587	3	1.57	5.13	109.37	12.8	1.85	1	2	2	1	1	1	1	1	1
1	44	1	172	82	27.7177	3	1.41	3.44	71.87	7.19	2.57	1	2	1	1	1	2	1	1	1
2	44	1	153	65	27.7671	3	1.18	4.26	85.58	9.96	0.92	1	2	1	1	1	1	1	1	1
2	43	1	165	66	24.2424	3	1.29	5.04	95.94	11.68	0.9	1	2	1	1	1	2	1	1	1
1	43	1	171	73	24.9649	3	1.5	4.33	81.04	8.54	1.62	1	4.34	1	1	1	2	2	1	1
2	43	1	158	64	25.6369	3	1.71	5.09	96.35	13.63	4.18	1	2	2	2	1	1	1	1	1
2	43	1	159	65	25.711	3	1.33	5.46	83.95	12.11	4.4	1	2	1	1	1	1	1	1	1
2	43	1	159	65	25.711	3	1.59	4.24	98.17	9	1.87	1	2	1	1	1	1	1	1	1
2	43	1	160	66	25.7812	3	2.01	4.92	88.79	11	1.15	1	2	1	1	1	1	1	1	1
2	43	1	162	68	25.9107	3	1.57	4.46	81.23	11.11	2.94	1	2	1	2	1	2	1	1	1
1	43	1	173	78	26.0617	3	1.49	5.11	91.3	11.3	0.94	1	2	1	2	1	2	2	1	1
2	43	1	165	72	26.4463	3	1.76	5.14	110.33	9.45	1.52	1	3.91	2	1	1	1	1	1	1
2	43	1	165	72	26.4463	3	2.1	5.68	104.76	11.39	1.23	1	2	1	1	1	2	1	1	1
2	43	1	155	64	26.6389	3	1.55	4.08	97.61	12.33	2.32	1	2	1	1	1	2	1	1	1
1	43	1	172	79	26.7036	3	2.08	4.74	95.48	9.1	2.64	1	2	1	2	1	2	1	1	1
2	43	1	160	70	27.3438	3	1.45	4.44	90.82	10.22	1.7	1	2	1	1	1	1	1	1	1
2	43	1	162	72	27.4348	3	1.71	5.31	109.32	9.7	1.33	1	2	1	2	1	1	1	1	1
1	43	1	178	87	27.4587	3	1.8	4.58	109.99	10.79	1.34	1	2	2	2	1	1	1	1	1
2	43	1	162	73	27.8159	3	1.11	0.32	70.26	9.8	3.01	1	2	1	2	1	1	1	1	1
1	42	1	177	76	24.2587	3	1.49	4.5	87.37	10.05	2.66	1	2	2	1	1	2	2	1	1
2	42	1	171	72	24.623	3	1.07	4.61	98.76	13.61	2.45	1	2	2	1	1	2	1	1	1
2	42	1	175	76	24.8163	3					3.82	1	2	2	1	1	2	1	1	1
2	42	1	151	57	24.9989	3	1.68	5.12	106.67	14.59	1.32	1	2	1	1	1	1	1	1	1
2	42	1	160	64	25	3	1.66	5.07	89.46	13.01	3.37	1	6.53	1	2	1	1	1	1	1
1	42	1	179	81	25.2801	3	1.37	4.92	90.81	13.15	1.24	1	3.53	1	1	1	2	2	1	1
2	42	1	156	62	25.4767	3	1.07				1.51	1	2	2	1	1	2	1	1	1
2	42	1	166	71	25.7657	3	1.48	4.01	86.75	9.41	1.49	1	2	1	1	1	2	1	1	1
2	42	1	170	75	25.9516	3	0.89	4.4	76.38	9.95	1.66	1	2	2	2	1	1	1	1	1
2	42	1	161	69	26.6193	3	1.68	5.2	95.94	10.2	1.77	1	2	1	1	1	2	1	1	1
1	42	1	164	72	26.7698	3	1.75	4.97	98.92	10.8	1.39	1	2.24	1	1	1	1	1	1	1
2	42	1	162	71	27.0538	3	1.14	4.17	80.78	10.23	2.89	1	2.23	1	1	2	1	1	2	1
2	42	1	176	85	27.4406	3	1.22	4.5	81.9	11.47	1.9	1	2	1	1	1	1	1	1	1
2	42	1	163	73	27.4756	3	2.38	7.14	133.15	19.64	0.01	1	2	1	2	2	1	1	2	1
2	42	1	149	61	27.4762	3	1.32	4.65	132.05	12.47	2.08	1	2	1	2	1	2	1	1	1
2	42	1	157	68	27.5873	3	1.33	3.5	92.97	10.51	2.32	1	2	2	2	1	1	1	1	1
2	42	1	165	76	27.9155	3	1.36	4.3	82.18	8.58	2.25	1	2	1	1	1	1	1	1	1
1	41	1	170	70	24.2215	3	1.6	5.63	107.29	11.58	1.41	1	2	2	1	1	2	1	1	1
2	41	1	161	64	24.6904	3	1.51	3.87	114.4	13.22	2.17	1	2	1	2	1	2	1	1	1
2	41	1	167	69	24.7409	3	1.36	3.95	97.59	9.81	2.59	1	2	2	2	1	1	1	1	1
1	41	1	173	75	25.0593	3	1.93	5.78	106.79	14.67	4.9	2	2	2	2	1	1	1	1	1
2	41	1	159	64	25.3155	3	1.49	5.16	96.8	11.25	1.56	1	2	2	2	1	2	1	1	1
2	41	1	155	61	25.3902	3	1.26	4.34	63.08	8.53	4.75	1	2	2	1	1	2	2	1	1
2	41	1	157	63	25.5588	3	1.3	3.87	93.47	8.85	3.78	1	2	1	2	2	1	1	2	1
2	41	1	163	68	25.5937	3	1.3	4.59	83.38	9.83	1.89	1	2	1	2	1	1	1	1	1
2	41	1	158	64	25.6369	3			77.65		3.43	1	2	1	2	1	1	1	1	1
2	41	1	160	67	26.1719	3	1.46	4.43	124.64	13.32	2.65	1	2	2	1	1	2	2	1	1
2	41	1	153	62	26.4855	3	1.06	4.18	73.17	10.74	3.25	1	2	1	1	1	1	1	1	1
2	41	1	169	77	26.9598	3	1.61	5.62	93.57	9.89	2.28	1	2.43	2	2	1	2	1	1	1
2	41	1	159	69	27.2932	3	1.63	4.6	93.52	10.19	1.28	1	2	1	2	1	2	1	1	1
2	41	1	162	72	27.4348	3	1.84	4.9	111.59	10.25	3.4	1	2	1	2	1	1	1	1	1
1	41	1	167	77	27.6095	3	1.47	4.76	101.09	10.05	1.49	1	2	2	1	1	2	2	2	1
1	41	1	174	84	27.7447	3	1.79	6.47	107.19	8.61	1.45	1	3.72	1	2	1	1	1	1	1
1	40	1	167	69	24.7409	3					2.56	1	3.17	1	1	1	1	1	1	1
1	40	1	178	79	24.9337	3	1.79	4.39	108.39	10.38	4.97	2	2	1	2	1	2	1	1	1
2	40	1	158	63	25.2363	3	1.62	4.53	83.43	10.63	1.84	1	2	2	2	1	1	1	1	1
1	40	1	167	73	26.1752	3	1.49	3.96	84.62	9.98	1.95	1	2	1	1	1	1	1	1	1
2	40	1	170	76	26.2976	3	1.56	5.07	93.35	8.96	2.25	1	2	1	1	1	1	1	1	1
2	40	1	164	71	26.398	3	1.75	4.46	116.09	9.71	2.18	1	2	1	1	1	2	1	1	1
2	40	1	152	61	26.4024	3	1.43	5.06	103.19	14.39	2.23	1	2	2	1	2	2	1	2	1
2	40	1	153	62	26.4855	3	1.97	3.77	75	7.71	1.98	1	2	1	2	1	2	1	1	1
2	40	1	150	60	26.6667	3	1.66	3.62	109.67	11.22	5.18	2	2	2	2	1	2	2	1	1
2	40	1	152	62	26.8352	3	1.21	4.84	52.47	8.25	3.28	1	2	1	1	1	1	1	1	1
2	40	1	161	70	27.0051	3	1.53	4.58	99.74	11.74	4.22	1	2	1	1	1	1	1	1	1
2	40	1	161	71	27.3909	3	1.41	4.33	81.95	9.36	1.94	1	2	2	1	1	1	1	1	1
1	40	1	178	87	27.4587	3	1.42	5.26	97.93	9.94	1.45	1	2	1	1	1	2	1	1	1
2	40	1	165	75	27.5482	3	1.68	4.93	85.54	9.29	4.06	1	2	2	1	2	1	1	2	1
2	40	1	168	78	27.6361	3	1.77	5.45	104.53	10.73	2.36	1	2	2	1	1	1	1	1	1
1	40	1	178	88	27.7743	3	1.36	4.32	90.36	9.64	1.25	1	2	1	2	1	2	1	1	1
2	39	1	159	61	24.1288	3	1.26	4.83	94.88	10.86	0.01	1	2	2	1	1	2	1	1	1
1	39	1	173	73	24.3911	3	1.52	4.8	84.77	10.83	1.79	1	2	1	2	2	2	1	2	1
2	39	1	162	65	24.7676	3	1.25	3.93	85.17	11.7	2.95	1	2	1	1	2	2	1	2	1
2	39	1	150	56	24.8889	3	1.42	5.02	92.37	10.06	2.78	1	2	1	1	1	2	1	1	1
2	39	1	155	61	25.3902	3	1.82	5.03	94.62	10.34	4.1	1	2	1	1	1	1	1	1	1
1	39	1	175	78	25.4694	3	1.45	4.54	78.58	9.1	2.81	1	2.83	2	2	1	2	2	1	1
2	39	1	162	68	25.9107	3	1.48	5.33	89.42	10.58	1.09	1	2	1	1	1	2	1	1	1
2	39	1	162	69	26.2917	3	1.36	6.36	90.81	11.5	2.31	1	2	1	1	1	1	1	1	1
2	39	1	154	63	26.5643	3	1.38	4.12	98.75	13.01	3.26	1	2	2	2	2	2	2	2	1
1	39	1	177	84	26.8122	3	1.5	4.84	112.82	11.52	0.69	1	2.29	2	1	1	2	1	1	1
2	39	1	161	71	27.3909	3	1.59	5.48	108.29	9.33	2.17	1	2	2	1	1	2	1	1	1
2	39	1	166	76	27.5802	3	1.47	4.67	97.54	9.83	2.03	1	2	2	1	2	2	1	2	1
2	38	1	159	61	24.1288	3	1.59	4.43	84.18	12.67	1.06	1	2	1	2	1	1	1	1	1
2	38	1	156	59	24.2439	3	1.5	3.71	94.02	12.5	1.48	1	2	2	2	2	2	2	2	1
2	38	1	165	67	24.6097	3	1.73	5.05	117.1	11.33	1.31	1	2	2	1	2	2	1	2	1
2	38	1	162	70	26.6728	3	1.36	4.58	81.48	9.16	10.49	2	2	2	1	1	1	1	1	1
2	38	1	160	69	26.9531	3	1.38	4.38	104.6	11.33	1	1	2	1	2	1	1	1	1	1
2	38	1	166	75	27.2173	3	1.33	4.04	81.01	11.12	8.05	2	2	2	1	1	2	1	1	1
2	37	1	158	60	24.0346	3	2.89	5.78	124.68	11.81	1.29	1	3.43	2	1	2	2	2	2	1
2	37	1	165	66	24.2424	3	1.06	4.54	107	12.03	0.91	1	2	1	2	1	2	1	1	1
2	37	1	165	66	24.2424	3	1.71	5.01	121.8	13.67	2.38	1	2	1	1	1	1	1	1	1
2	37	1	163	65	24.4646	3	1.32	3.61	94.97	11.53	1.57	1	2	1	2	1	1	1	1	1
2	37	1	158	62	24.8358	3			76.25	7.06	8.55	2	2	2	1	1	1	1	1	1
2	37	1	160	64	25	3	1.24	4.52	90.26	14.84	1.83	1	2	2	2	1	2	2	1	1
2	37	1	162	66	25.1486	3	1.63	5.03	111.62	9.82	2.08	1	2	2	2	1	2	2	1	1
2	37	1	157	62	25.1532	3	1.18	4.34	111.42	10.18	0.99	1	2	1	1	1	2	1	1	1
2	37	1	158	64	25.6369	3	1.3	4.56	97.54	11.68	0.7	1	2	2	2	1	2	1	1	1
2	37	1	159	66	26.1066	3	1.44	4.71	86.89	9.99	1.76	1	2	2	2	1	1	1	1	1
2	37	1	154	62	26.1427	3	1.44	4.39	121.12	13.37	1.29	1	2	1	1	1	1	1	1	1
2	37	1	162	69	26.2917	3	1.82	4.4	114.06	10.98	4.3	1	2	1	2	1	1	1	1	1
2	37	1	163	70	26.3465	3	1.33	4.56	88.15	10.16	1.74	1	2	1	1	1	1	1	1	1
2	37	1	158	69	27.6398	3	1.68	3.93	124.68	12.48	2.63	1	2	1	1	1	1	1	1	1
1	37	1	172	82	27.7177	3			76.25	7.06	8.55	2	2	1	1	1	1	1	1	1
2	36	1	164	65	24.1672	3	1.05	3.27	81.32	9.34	0.99	1	2	1	1	1	1	1	1	1
2	36	1	160	65	25.3906	3	1.5	3.88	99.28	9.85	2.1	1	2	1	2	1	1	1	1	1
2	36	1	160	65	25.3906	3	1.86	5.12	83.72	10.95	2.83	1	2	2	2	1	2	1	1	1
2	36	1	151	58	25.4375	3					1.79	1	2	1	1	1	1	1	1	1
1	36	1	182	85	25.6612	3					1.88	1	3.27	2	2	1	2	2	1	1
1	36	1	179	85	26.5285	3	1.46	5.34	83.45	10.09	1.84	1	2	1	1	1	1	1	1	1
2	36	1	154	63	26.5643	3	1.66	4.73	80.03	8.78	4.51	1	2	2	2	2	2	1	2	1
2	36	1	161	69	26.6193	3	1.35	4.53	82.23	10.05	1.37	1	2	2	2	2	2	1	2	1
1	36	1	170	77	26.6436	3	1.18	4.87	90.85	12.6	1.03	1	2	1	1	2	1	1	2	1
2	36	1	163	71	26.7229	3	1.36	4.54	96.05	10.2	4.58	1	2	2	2	1	2	2	1	1
2	36	1	167	75	26.8923	3	1.17	3.99	112.77	11.34	2.47	1	2	2	2	1	1	1	1	1
1	36	1	169	78	27.31	3	1.6	5.09	99.05	11.73	2.35	1	2	1	2	1	1	1	1	1
2	36	1	160	70	27.3438	3	1.46	4.68	102.33	11.21	1.87	1	2	2	2	2	2	2	2	1
1	36	1	179	89	27.7769	3	1.55	4.57	67.99	9.92	1.53	1	2	2	1	1	2	1	1	1
2	35	1	162	63	24.0055	3	1.05		68.04		1.62	1	2	1	2	1	2	1	1	1
2	35	1	162	64	24.3865	3	1.9	5.72	108.84	13.08	2	1	2	2	2	1	1	1	1	1
2	35	1	158	61	24.4352	3	1.53	3.94	77.21	9.22	3.73	1	2	2	1	1	2	2	1	1
2	35	1	164	66	24.539	3					2.59	1	2	1	1	1	1	1	1	1
2	35	1	160	64	25	3	1.59	5.1	118.48	10.74	2.01	1	2	1	2	1	2	1	1	1
2	35	1	160	65	25.3906	3	1.75	5.43	94.95	12.89	3.75	1	2	1	2	1	1	1	1	1
1	35	1	176	79	25.5036	3	1.4	5.15	121.01	12.22	1.68	1	5.83	1	2	2	2	2	2	1
2	35	1	158	66	26.4381	3					2.29	1	2	1	1	1	1	1	1	1
2	35	1	162	70	26.6728	3	1.59	4.7	78.49	11.31	3.87	1	2	1	1	1	1	1	1	1
2	35	1	164	72	26.7698	3	1.37	4.49	88.79	10.41	1.94	1	2	1	1	1	1	1	1	1
2	35	1	161	70	27.0051	3	1.83	4.81	83.05	9.45	2.72	1	2	1	2	1	2	2	1	1
2	35	1	153	64	27.3399	3	1.62	5.67	107.1	12.34	0.62	1	2	1	1	1	1	1	1	1
2	34	1	162	63	24.0055	3	1.67	3.99	120.3	12.19	2.58	1	2	2	2	1	1	1	1	1
2	34	1	162	64	24.3865	3	1.58	5.4	77.24	9.8	2.99	1	2	2	1	1	2	2	1	1
2	34	1	165	67	24.6097	3	1.14	4.72	121.91	12.21	1.86	1	2	2	2	1	1	1	1	1
2	34	1	167	71	25.4581	3	1.63	3.74	100.89	9.97	1.85	1	2	1	1	1	1	1	1	1
1	34	1	176	79	25.5036	3	1.68	4.51	84.24	8.4	1.08	1	2	2	1	1	2	1	1	1
2	34	1	154	62	26.1427	3	1.65	5.11	95.34	10.17	1.44	1	2	1	1	1	1	1	1	1
1	34	1	170	78	26.9896	3	1.52	4.93	110.06	11.79	3.9	1	2	1	1	1	1	1	1	1
2	33	1	151	57	24.9989	3			74.86		4.68	1	2	2	1	1	1	1	1	1
1	33	1	182	85	25.6612	3	1.69	5.26	96.38	9.42	0.7	1	2	1	1	1	1	1	1	1
1	33	1	178	82	25.8806	3	1.57	4.9	87.68	10.35	2.06	1	2	1	1	1	2	1	1	1
2	33	1	156	66	27.1203	3	1.29	2.92	83.9	7.83	1.75	1	2	2	2	2	2	1	2	1
1	33	1	179	88	27.4648	3	1.69	4.36	69.73	8.56	3.4	1	2	2	1	1	2	2	1	1
2	33	1	163	73	27.4756	3	1.76	4.47	91.82	11.28	1.1	1	2	2	2	1	2	1	1	1
2	33	1	168	78	27.6361	3	1.17	4.19	82.44	15.71	1.58	1	2	2	1	1	1	1	1	1
2	32	1	167	68	24.3824	3	1.24	3.3	85.9	10.95	1.39	1	2	2	2	1	2	1	1	1
2	32	1	158	64	25.6369	3	1.55	4.64	76.9	7.56	6.9	2	2	2	2	1	2	1	1	1
1	32	1	178	85	26.8274	3	1.18	3.73	88.24	11.01	3.24	1	2	1	1	1	2	1	1	1
2	32	1	158	68	27.2392	3	1.48	5.13	102.28	13.48	1.09	1	2	2	1	1	2	1	1	1
1	31	1	180	79	24.3827	3	1.07	4.87	79.56	12.79	1.22	1	2	2	1	1	2	1	1	1
1	31	1	181	83	25.335	3	1.78	5.04	108.82	12.59	1.22	1	2.03	2	2	1	2	1	1	1
1	31	1	173	76	25.3934	3	5.11	20.89	276.48	63.54	0.03	1	2	1	1	2	2	1	2	1
1	30	1	165	67	24.6097	3	1.38	4.2	93.98	13.32	4.47	1	2	2	2	1	2	1	1	1
2	30	1	154	60	25.2994	3	1.44	4.99	103.97	9.65	0.72	1	2.85	2	1	1	1	1	1	1
2	30	1	166	70	25.4028	3					3.07	1	2	2	1	2	2	2	2	1
2	30	1	160	66	25.7812	3	1.37	4.58	97.62	12.25	2.62	1	2	1	1	1	2	1	1	1
2	30	1	162	69	26.2917	3	1.59	4.37	108.7	10.87	0.98	1	2	2	1	1	1	1	1	1
1	30	1	178	85	26.8274	3					2.42	1	2	2	2	1	2	2	1	1
1	30	1	180	88	27.1605	3	1.54	4.8	84.4	11.43	2.92	1	4.25	1	1	1	2	1	1	1
2	30	1	162	72	27.4348	3	1.45	4.9	130.5	15.61	8.43	2	2	2	1	2	1	1	2	1
2	29	1	166	68	24.677	3	1.34	4.86	104.29	10.82	1.54	1	2	2	1	1	2	1	1	1
2	29	1	157	62	25.1532	3	1.43	4.16	97.27	9.26	0.71	1	2	1	1	1	2	1	1	1
2	29	1	159	66	26.1066	3	1.69	5.34	113.44	13.03	1.51	1	2	1	1	1	1	1	1	1
2	29	1	167	75	26.8923	3	1.8	3.89	119.48	12.98	2.41	1	2	2	1	1	2	1	1	1
2	28	1	161	68	26.2336	3	1.55	4.42	94.87	10.37	0.64	1	2	2	1	1	2	1	1	1
2	28	1	161	69	26.6193	3	1.8	5.02	122.41	12.24	2.33	1	2	1	1	1	1	1	1	1
1	28	1	173	81	27.0641	3	1.24	4.85		14.17	1.85	1	2	1	1	1	2	1	1	1
2	27	1	159	63	24.9199	3					0.53	1	4.02	2	2	1	2	2	1	1
2	27	1	162	67	25.5296	3					2.58	1	2	1	1	1	1	1	1	1
2	27	1	163	73	27.4756	3	1.46	4.96	106.27	12.3	2.49	1	2	1	2	1	1	1	1	1
1	27	1	169	79	27.6601	3	1.65	4.99	67.33	11.08	1.83	1	2	1	1	1	1	1	1	1
2	27	1	152	64	27.7008	3	1.49	4.42	111.86	14.48	0.82	1	3.11	2	2	1	1	1	1	1
2	26	1	154	58	24.4561	3	1.69	4.7	107.02	11.87	1.67	1	2	2	2	1	2	2	1	1
1	26	1	169	71	24.8591	3	2.07	6.3	100.62	14.03	2.87	1	2	2	1	1	2	2	1	1
1	25	1	180	78	24.0741	3	1.42	5.2	105.17	13.61	0.97	1	3.61	2	1	1	2	1	1	1
2	25	1	171	72	24.623	3			77.08		1.42	1	2	1	1	1	2	2	1	1
2	25	1	159	68	26.8977	3	1.95	4.72	131.68	15	3.98	1	2.44	2	1	1	1	1	1	1
1	23	1	188	90	25.464	3	1.11	4.42	76.97	11.1	1.19	1	2	2	1	1	2	2	1	1
1	22	1	186	84	24.2803	3	1.8	4.95	103.52	12.98	3.57	1	2	1	1	2	1	1	2	1
2	20	1	166	68	24.677	3	1.89	4.77	104.81	12.89	2.26	1	2	2	1	1	2	1	1	1
2	20	1	165	70	25.7117	3					0.99	1	4.5	2	1	1	2	1	1	1
2	19	1	161	65	25.0762	3	1.7	3.95	89.82	10.69	2.17	1	2	2	2	1	2	1	1	1
2	54	1	164	52	19.3337	2	1.48	5.06	95.57	11.67	1.77	1	3.19	1	1	1	2	2	1	1
2	54	1	164	53	19.7055	2	1.49	4.72	100.71	12.2	4.16	1	2	2	1	1	1	1	1	1
1	54	1	167	58	20.7967	2					5.23	2	2	1	2	2	2	2	2	1
2	54	1	147	45	20.8247	2	1.67	5.07	89.75	11.57	2.59	1	2	1	1	1	1	1	1	1
2	54	1	159	53	20.9644	2	1.72	5.56	104.55	14.91	2.05	1	2	1	1	1	1	1	1	1
2	54	1	160	54	21.0938	2	1.25	4.63	83.17	12.5	4.43	1	2	1	1	1	1	1	1	1
2	54	1	170	62	21.4533	2	1.13	4.25	94.27	12.12	2.08	1	2	1	2	1	1	1	1	1
1	54	1	172	64	21.6333	2	1.9	4.99	135.15	12.19	0.55	1	2	2	1	1	2	1	1	1
2	54	1	159	55	21.7555	2	1.51	4.42	88.39	11.88	5.63	2	2	2	1	1	2	2	1	1
2	54	1	151	51	22.3674	2	1.35	4.18	92.51	9.77	1.1	1	2	2	1	1	1	1	1	1
2	54	1	165	62	22.7732	2	1.73	4.26	100.07	11.82	2.58	1	2	1	1	1	1	1	1	1
2	53	1	160	59	23.0469	2	1.84	4.91	98.6	11.93	2.55	1	2	2	1	1	2	2	1	1
2	53	1	157	57	23.1247	2	1.18	4.82	104.12	12.1	1.74	1	2	1	1	1	1	1	1	1
2	53	1	165	63	23.1405	2	1.45	4.52	87.5	11.38	2	1	2	1	1	1	1	1	1	1
2	53	1	162	61	23.2434	2	0.97	3.44	84.82	9.96	2.18	1	2	1	1	1	1	1	1	1
2	53	1	154	56	23.6128	2	1.62	3.94	88.19	9	3.28	1	2	1	1	1	1	1	1	1
2	53	1	161	62	23.9188	2	1.19	4.19	89.1	13.94	3.77	1	2	1	2	1	1	1	1	1
2	51	1	158	52	20.83	2	1.39	4.52	94.54	9.96	2.12	1	2	1	1	1	1	1	1	1
2	51	1	165	57	20.9366	2	1.69	5.21	125.84	14.23	2.65	1	2	2	1	1	1	1	1	1
2	51	1	153	50	21.3593	2	1.34	4.07	98.38	10.95	2.62	1	2	1	1	1	1	1	1	1
2	51	1	167	60	21.5139	2	1.32	3.97	105.02	12.57	1.44	1	2	1	2	1	1	1	1	1
2	51	1	161	58	22.3757	2	1.42	5.28	109.38	13.26	1.87	1	2	2	1	1	1	1	1	1
2	51	1	154	55	23.1911	2					2.95	1	2	1	1	1	1	1	1	1
2	51	1	165	64	23.5078	2	1.31	4.02	93.94	12.09	0.76	1	2	1	1	1	2	1	1	1
2	51	1	165	64	23.5078	2	1.42	5.02	72.97	8.84	3.75	1	2	1	1	1	1	1	1	1
2	51	1	170	69	23.8754	2	1.65	4.69	101.07	9.99	0.99	1	2	1	1	1	1	1	1	1
1	51	1	175	75	24.4898	2	1.67	5.13	113.41	14.1	2.32	1	2	1	2	2	2	2	2	1
2	50	1	166	56	20.3223	2	2.26	4.38	110.64	10	1.26	1	2	1	1	1	1	1	1	1
2	50	1	167	59	21.1553	2	1.3	4.68	84.78	11.58	3.15	1	2	1	1	1	1	1	1	1
2	50	1	167	60	21.5139	2	1.24	4.22	80.61	10.89	5.08	2	2	2	1	1	2	1	1	1
2	50	1	162	57	21.7193	2	1.04	4.12	99.17	12.85	2.58	1	2	1	2	1	1	1	1	1
2	50	1	165	60	22.0386	2	1.53	5.75	120.48	13.19	2	1	2	1	1	1	1	1	1	1
2	50	1	163	59	22.2063	2	1.58	4.05	91.06	10.02	1.64	1	2	1	1	1	2	1	1	1
2	50	1	164	60	22.3081	2	1.3	4.01	92.54	10.66	0.82	1	2	1	1	1	1	1	1	1
2	50	1	161	58	22.3757	2	1.47	4.54	88.8	8.63	5.98	2	2	2	1	1	2	1	1	1
2	50	1	169	64	22.4082	2	1.32	4.27	78.3	9.18	3.44	1	2	2	2	1	1	1	1	1
2	50	1	156	55	22.6003	2	1.23	3.84	102.57	13.42	1.62	1	2	2	1	1	2	1	1	1
2	50	1	160	58	22.6562	2	1.34	4.49	125.36	11.48	1.26	1	2	1	2	1	1	1	1	1
2	50	1	158	57	22.8329	2	1.74	5.04	110.68	12.48	1.31	1	2	2	1	1	1	1	1	1
2	50	1	155	56	23.3091	2	0.87	2.94	82.45	10.6	2.3	1	2	2	1	1	1	1	1	1
2	50	1	160	60	23.4375	2	1.49	5.67	92.49	13.49	2.1	1	2	1	1	1	1	1	1	1
2	50	1	165	64	23.5078	2	1.42	5.02	72.97	8.84	3.75	1	2	1	1	1	1	1	1	1
2	50	1	165	64	23.5078	2	1.31	4.02	93.94	12.09	0.76	1	2	1	1	1	2	1	1	1
2	50	1	154	56	23.6128	2	0.87	2.94	82.45	10.6	2.3	1	2	2	1	1	1	1	1	1
2	50	1	155	57	23.7253	2	1.31	3.64	92.17	12.64	1.37	1	2	1	1	1	1	1	1	1
2	50	1	159	60	23.7332	2	1.65	4.84	83.61	9.36	4.99	2	2	2	2	1	2	1	1	1
1	49	1	176	65	20.984	2	1.89	5.65	119.3	12.13	1.76	1	2	1	1	1	1	1	1	1
2	49	1	157	52	21.0962	2	1.64	4.67	92.75	11.27	1.93	1	2	1	2	1	1	1	1	1
2	49	1	157	54	21.9076	2	1.01	3.4	92.11	9.31	3.31	1	2	1	1	1	1	1	1	1
2	49	1	157	56	22.719	2	1.6	5.2	82.66	9.58	2.31	1	2	1	2	1	1	1	1	1
1	49	1	162	60	22.8624	2	1.74	4.44	108.93	12.78	0.43	1	2	2	2	1	2	2	1	1
1	49	1	178	73	23.04	2	1.26	4.95	104.81	9.78	2.32	1	2.65	1	1	1	2	2	1	1
2	49	1	165	63	23.1405	2	0.92		65.05	9.08	5.54	2	2	2	1	1	1	1	1	1
2	49	1	166	64	23.2254	2	1.31	4.26	86.86	7.68	5.77	2	2	2	2	1	1	1	1	1
2	49	1	165	64	23.5078	2	0.92		65.05	9.08	5.54	2	2	2	1	1	1	1	1	1
2	49	1	154	56	23.6128	2	1.2	3.78	86.54	11.95	2.24	1	2	2	1	1	1	1	1	1
2	49	1	154	56	23.6128	2	1.2	3.78	86.54	11.95	2.24	1	2	2	1	1	1	1	1	1
2	49	1	155	57	23.7253	2	1.19	3.74	106.87	11.48	3.13	1	2	1	1	1	2	1	1	1
2	49	1	160	61	23.8281	2	1.46	4.43	100.58	10.92	5.19	2	2	1	1	1	1	1	1	1
1	48	1	169	54	18.9069	2	1.33	3.8	77.47	11.3	1.52	1	2	1	1	2	1	1	2	1
2	48	1	155	48	19.9792	2	1.53	4.22	105.66	11.65	0.54	1	2	2	1	1	2	1	1	1
2	48	1	167	56	20.0796	2	1.5	4.9	99.67	0.52	2.2	1	2	1	1	1	2	1	1	1
2	48	1	160	55	21.4844	2	1.44	4.15	92.79	9.91	0.93	1	2	1	1	1	1	1	1	1
2	48	1	161	56	21.6041	2	1.51	5.02	115.23	12.85	2.9	1	2	1	1	1	1	1	1	1
2	48	1	162	58	22.1003	2	1.47	4.13	92.43	11.6	4.08	1	2	2	2	1	1	1	1	1
2	48	1	164	60	22.3081	2	1.38	3.47	107.88	13.63	1.09	1	2	1	1	1	1	1	1	1
2	48	1	165	61	22.4059	2	1.38	4.78	88.87	11.02	3.4	1	2	2	2	1	1	1	1	1
2	48	1	156	55	22.6003	2	1.75	4.01	105.04	10.34	2.35	1	2	1	2	1	2	1	1	1
2	48	1	161	59	22.7615	2	1.47	4.63	77.79	8.49	1.17	1	2	1	2	1	1	1	1	1
2	48	1	158	57	22.8329	2	1.67	5.62	109.73	13.19	2.59	1	2	1	2	1	1	1	1	1
2	48	1	155	55	22.8928	2	1.57	4.54	113.51	12.27	2.31	1	2	1	2	1	1	1	1	1
2	48	1	161	60	23.1473	2	1.18	4.24	89.69	9.69	1.27	1	2	1	1	1	2	1	1	1
1	48	1	166	64	23.2254	2	1.68	4.13	108.88	9.33	3.81	1	2	2	2	1	2	2	1	1
2	48	1	158	58	23.2335	2	1.12	4.81	90.43	10.89	1.76	1	1	1	2	1	1	1	1	1
1	48	1	176	72	23.2438	2					1.3	1	2	1	1	1	2	1	1	1
2	48	1	156	57	23.4221	2	1.75	5.23	111.71	12.63	1.5	1	2	1	2	1	1	1	1	1
2	48	1	155	57	23.7253	2	11.34	5	92.47	10.96	0.82	1	2	1	1	1	1	1	1	1
2	47	1	166	56	20.3223	2	1.29	4.36	4.36	9.96	0.64	1	2	1	2	1	1	1	1	1
2	47	1	165	56	20.5693	2	0.94				4.29	1	2	1	1	1	2	1	1	1
2	47	1	163	55	20.7008	2	1.2	4.08	87.98	10.36	0.55	1	2	1	1	1	1	1	1	1
2	47	1	155	50	20.8117	2	1.52	5.19	79.5	9.28	3.93	1	2	1	1	1	1	1	1	1
2	47	1	163	56	21.0772	2	1.15	3.81	95.44	12.52	2.87	1	2	1	1	2	1	1	2	1
2	47	1	160	55	21.4844	2	1.23	4.27	129.25	16.45	0.42	1	3.34	2	2	2	2	1	2	1
2	47	1	160	55	21.4844	2	1.42	5.01	85.47	12.08	4.91	2	2	2	1	1	2	1	1	1
1	47	1	177	69	22.0243	2	1.7	4.67	119.27	11.27	1.6	1	3.04	1	1	1	1	1	1	1
2	47	1	165	60	22.0386	2	2.03	4.59	100.18	9.36	2.25	1	2	1	1	1	1	1	1	1
2	47	1	169	63	22.0581	2	1.36	3.55	86.18	12.9	5.26	2	2	1	1	1	1	1	1	1
2	47	1	159	57	22.5466	2	1.37	4.23	92.64	12.52	2.06	1	2	2	2	1	1	1	1	1
2	47	1	155	55	22.8928	2	1.3	4.64	90.43	10.21	2.58	1	4.27	2	2	1	1	1	1	1
1	47	1	176	72	23.2438	2					1.3	1	2	1	1	1	2	1	1	1
2	47	1	155	56	23.3091	2	1.28	5.05	122.88	13.4	1.96	1	2	2	2	1	2	1	1	1
2	47	1	155	56	23.3091	2	1.44	4.39	104.76	9.56	2.58	1	2	1	1	1	2	1	1	1
2	47	1	155	56	23.3091	2	1.38	5.23	96.71	11.1	1.36	1	2	1	1	1	1	1	1	1
2	47	1	159	59	23.3377	2	1.5	4.02	80.6	10.02	2.4	1	2	1	1	1	1	1	1	1
2	47	1	156	57	23.4221	2	1.75	5.23	111.71	12.63	1.5	1	2	1	2	1	1	1	1	1
2	47	1	157	58	23.5304	2	1.12	4.81	90.43	10.89	1.76	1	1	1	2	1	1	1	1	1
2	47	1	158	59	23.634	2	1.89	5.65	83.15	10.53	1.96	1	2	2	2	1	1	1	1	1
2	47	1	158	59	23.634	2	1.5	4.02	80.6	10.02	2.4	1	2	1	1	1	1	1	1	1
2	47	1	148	52	23.74	2	1.48	4.42	96.83	11.91	3.69	1	2.98	1	1	1	1	1	1	1
2	46	1	156	46	18.902	2	1.34	4.32	107.2	12.43	2.78	1	2	2	1	1	2	2	1	1
2	46	1	162	51	19.433	2	1.52	5.86	80.54	8.98	2.62	1	2	2	1	1	2	1	1	1
2	46	1	159	51	20.1733	2	1.53	4.54	86.68	11.02	1.44	1	2	1	2	1	1	1	1	1
2	46	1	165	59	21.6713	2	1.66	4.19	104.16	12.33	4.69	1	2	2	1	1	1	1	1	1
2	46	1	160	56	21.875	2	1.36	4.81	81.15	10.4	2.5	1	2	2	2	1	1	1	1	1
2	46	1	160	58	22.6562	2	1.56	4.32	116.59	11.47	1.47	1	2	1	1	1	1	1	1	1
2	46	1	164	61	22.68	2	1.31	5.34	110.08	12.34	3.79	1	2	1	2	1	2	2	1	1
2	46	1	169	65	22.7583	2	1.43	5.5	168.77	9.78	2.53	1	2	1	1	1	1	1	1	1
2	46	1	165	63	23.1405	2	1.39	4.33	109.37	10.74	5.79	2	2	2	1	1	1	1	1	1
2	46	1	154	55	23.1911	2	1.52	4.12	99.24	11.49	1.59	1	2	2	2	1	1	1	1	1
2	46	1	154	55	23.1911	2	1.55	4.48	117.2	12.49	2.04	1	2	2	1	1	1	1	1	1
2	46	1	155	56	23.3091	2	1.38	5.23	96.71	11.1	1.36	1	2	1	1	1	1	1	1	1
2	46	1	155	56	23.3091	2	1.28	5.05	122.88	13.4	1.96	1	2	2	2	1	2	1	1	1
2	46	1	155	56	23.3091	2	1.44	4.39	104.76	9.56	2.58	1	2	1	1	1	2	1	1	1
2	46	1	159	59	23.3377	2	0.99	3.14	78.26	12.5	2.9	1	2	2	2	1	2	2	1	1
2	46	1	161	61	23.533	2	1.54	4.84	68.08	11.46	2.01	1	2	1	1	1	1	1	1	1
1	46	1	171	69	23.597	2	1.52	5.15	99.88	12	1.25	1	2	1	2	1	2	2	1	1
1	46	1	171	69	23.597	2	1.52	5.15	99.88	12	1.25	1	2	1	2	1	2	2	1	1
2	46	1	172	70	23.6614	2	1.66	5.17	73.81	9.88	6	2	2	1	2	1	1	1	1	1
2	46	1	160	61	23.8281	2	1.01	3.75	83.51	9.6	3.86	1	2	2	1	1	1	1	1	1
2	46	1	143	49	23.9621	2	1.2	3.69	84.18	9.3	1.54	1	2	1	1	1	1	1	1	1
2	45	1	157	46	18.662	2	1.36	4.78	115.38	16.13	1.13	1	2	1	1	1	2	2	1	1
1	45	1	188	67	18.9565	2					1.38	1	2	1	1	1	1	1	1	1
2	45	1	160	49	19.1406	2	1.44	4.79	102.79	13.11	3.06	1	2	2	1	1	2	2	1	1
2	45	1	158	48	19.2277	2	1.37	4.33	115.96	10.16	1.65	1	2	1	1	2	2	1	2	1
2	45	1	168	55	19.487	2					3.11	1	2	2	2	1	2	1	1	1
2	45	1	155	51	21.2279	2	0.99	3.64	86.81	10.56	1.92	1	2	2	1	1	2	2	1	1
2	45	1	165	59	21.6713	2	1.91	4.28	110.93	11.69	1.83	1	2	2	2	1	2	2	1	1
1	45	1	180	71	21.9136	2	1.92	5.56	96.18	10.27	1.53	1	7.04	1	1	1	1	1	1	1
2	45	1	167	62	22.231	2	1.38	4.68	84.38	10.74	3.71	1	2	1	1	1	1	1	1	1
2	45	1	162	59	22.4813	2			71.41		0.59	1	2	2	1	2	1	1	2	1
2	45	1	160	58	22.6562	2	1.47	5.24	118.65	12.59	1.37	1	2	1	2	1	1	1	1	1
2	45	1	155	55	22.8928	2	2.15	6	105.25	9.82	2.29	1	2	2	1	1	1	1	1	1
2	45	1	152	53	22.9398	2	1.31	4.89	119.21	11.68	1.54	1	2.31	1	2	2	1	1	2	1
2	45	1	159	59	23.3377	2	0.99	3.14	78.26	12.5	2.9	1	2	2	2	1	2	2	1	1
2	45	1	168	66	23.3844	2	1.55	4.29	91.14	12.56	1	1	2	1	2	1	2	1	1	1
2	45	1	165	64	23.5078	2	1.63	4	86.53	10.17	2.69	1	2	1	1	1	2	1	1	1
2	45	1	161	61	23.533	2	1.54	4.84	68.08	11.46	2.01	1	2	1	1	1	1	1	1	1
2	45	1	172	70	23.6614	2	1.66	5.17	73.81	9.88	6	2	2	1	2	1	1	1	1	1
2	45	1	167	66	23.6652	2	1.37	4.69	90.94	10.7	3.56	1	2	2	2	2	2	1	2	1
2	45	1	168	67	23.7387	2	1.29	3.78	82.41	10.26	3.86	1	2	2	1	1	2	1	1	1
2	44	1	166	53	19.2336	2	1.55	4.37	99.38	9.19	0.94	1	2	1	1	1	1	1	1	1
2	44	1	153	48	20.5049	2	1.41	4.36	120.49	13.93	2.84	1	2	2	1	1	2	2	1	1
2	44	1	159	52	20.5688	2	1.67	5.26	109.43	13.93	4.4	1	2	1	1	1	1	1	1	1
2	44	1	167	58	20.7967	2	1.21	5.01	111.11	12.98	2.18	1	2	2	1	1	1	1	1	1
2	44	1	168	59	20.9042	2	1.14	4.26	70.78	9.99	0.81	1	2	2	2	1	2	2	1	1
2	44	1	162	55	20.9572	2	1.15	4.47	103.69	14.2	2.91	1	2	1	2	1	1	1	1	1
2	44	1	163	56	21.0772	2	1.52	4.63	111.42	78.82	1.17	1	2	2	1	1	2	1	1	1
2	44	1	154	51	21.5045	2	1.45	4.57	83.78	9.11	0.6	1	4.2	1	1	1	1	1	1	1
2	44	1	169	62	21.7079	2	1.66	4.82	122.36	13.94	0.98	1	2	1	1	1	2	2	1	1
2	44	1	166	60	21.7738	2	1.46	4.26	95.27	9.68	2.63	1	2	1	1	1	1	1	1	1
2	44	1	163	58	21.83	2	1.34	4.13	76.56	9.05	2.9	1	2	2	2	1	1	1	1	1
2	44	1	160	56	21.875	2	1.35	4.38	94.07	12.34	1.5	1	2	2	1	1	1	1	1	1
2	44	1	166	61	22.1367	2	1.57	3.94	82.3	10.74	3.01	1	2	1	1	2	2	1	2	1
2	44	1	166	61	22.1367	2	1.49	4.62	86.53	9.74	5.1	2	2	2	1	1	2	1	1	1
2	44	1	160	57	22.2656	2			62		2.47	1	2	2	1	1	2	1	1	1
2	44	1	161	58	22.3757	2	1.41	4.25	88.35	8.09	4.6	1	2	2	1	1	2	1	1	1
2	44	1	159	57	22.5466	2	1.47	3.34	90.83	10.18	1.1	1	2	2	1	1	2	2	1	1
2	44	1	164	61	22.68	2	1.41	4.5	101.79	9.74	2.94	1	2	1	1	1	2	1	1	1
2	44	1	156	56	23.0112	2	1.32	4.37	96.94	10.72	4.23	1	2	1	2	2	2	1	2	1
1	44	1	178	73	23.04	2	1.49	4.5	94.15	11.13	0.96	1	2	1	1	1	1	1	1	1
2	44	1	160	59	23.0469	2	1.89	4.73	81.3	10.76	1.44	1	2	1	2	1	1	1	1	1
1	44	1	167	65	23.3067	2	1.36	4.16	85.16	9.71	2.27	1	2	1	1	1	1	1	1	1
2	44	1	168	66	23.3844	2	1.55	4.29	91.14	12.56	1	1	2	1	2	1	2	1	1	1
2	44	1	168	66	23.3844	2	1.38	5.54	80.86	8.97	2.98	1	2	2	1	1	2	1	1	1
2	44	1	160	60	23.4375	2	1.29	6.06	90.85	12.78	1.73	1	2	2	2	2	2	2	2	1
2	44	1	165	64	23.5078	2	1.63	4	86.53	10.17	2.69	1	2	1	1	1	2	1	1	1
2	44	1	164	64	23.7954	2	1.18	4.26	85.58	9.96	0.92	1	2	1	1	1	1	1	1	1
2	43	1	169	55	19.257	2	1.42	3.99	88.39	9.36	3.26	1	2	1	1	1	1	1	1	1
1	43	1	168	56	19.8413	2					0.96	1	13	1	2	1	2	1	1	1
2	43	1	157	49	19.8791	2	1.08	4.35	68.26	11.62	4.05	1	2	1	2	2	1	1	2	1
2	43	1	166	56	20.3223	2	1.7	5.33	111.11	13.62	1.64	1	2	1	1	1	1	1	1	1
1	43	1	171	60	20.5191	2	1.76	5.72	86.67	9.63	2.67	1	2	1	2	1	2	1	1	1
2	43	1	161	54	20.8325	2	1.35	4.38	75.7	9.32	2.83	1	2	1	2	1	1	1	1	1
2	43	1	165	58	21.3039	2	1.38	3.74	84.13	12.28	0.82	1	2	2	2	2	2	1	2	1
2	43	1	160	56	21.875	2	1.51	4.63	96.53	14.84	1.6	1	2	2	1	1	2	2	1	1
2	43	1	165	60	22.0386	2	1.19	4.46	89.94	11.85	1.67	1	2	2	2	1	1	1	1	1
2	43	1	164	60	22.3081	2	1.39	4.87	91.97	9.62	2.37	1	2	2	1	1	2	2	1	1
2	43	1	161	58	22.3757	2	1.79	4.1	110.92	13.05	2.91	1	2	1	1	1	2	2	1	1
2	43	1	160	58	22.6562	2	2.79	6.32	186.24	11.71	0.85	1	2	1	2	1	1	1	1	1
2	43	1	148	50	22.8269	2	1.07	4.11	109.3	11.89	2.01	1	2	1	1	1	1	1	1	1
2	43	1	159	58	22.9421	2	1.59	4.05	87.37	11.25	1.58	1	2	1	2	2	2	1	2	1
2	43	1	169	66	23.1084	2	1.88	5.14	119.51	10.84	3.65	1	2	2	2	1	1	1	1	1
2	43	1	168	66	23.3844	2	1.25	4.3	101.71	11.57	2.07	1	2	1	2	1	1	1	1	1
2	43	1	168	66	23.3844	2	1.38	5.54	80.86	8.97	2.98	1	2	2	1	1	2	1	1	1
2	43	1	168	66	23.3844	2	1.25	4.3	101.71	11.57	2.07	1	2	1	2	1	1	1	1	1
2	43	1	160	60	23.4375	2	1.29	6.06	90.85	12.78	1.73	1	2	2	2	2	2	2	2	1
2	43	1	170	68	23.5294	2	1.27	4.46	92.08	11.2	3.6	1	2	1	2	1	1	1	1	1
2	43	1	170	68	23.5294	2	1.42	5.28	75.09	9.93	1.35	1	2	1	2	1	1	1	1	1
2	43	1	170	68	23.5294	2	1.27	4.46	92.08	11.2	3.6	1	2	1	2	1	1	1	1	1
2	43	1	170	68	23.5294	2	1.42	5.28	75.09	9.93	1.35	1	2	1	2	1	1	1	1	1
2	43	1	162	62	23.6244	2	1.08	3.42	86.54	10.36	1.79	1	2	2	1	1	2	2	1	1
2	43	1	164	64	23.7954	2	1.37	3.7	87.78	8.05	2.91	1	2	2	2	1	1	1	1	1
2	43	1	170	78	26.9896	2	3.8	10.06	272.59	14.42	0.72	1	2	2	2	2	2	2	2	1
2	42	1	163	52	19.5717	2	1.45	4.18	83.06	12.43	2.09	1	2	1	1	1	1	1	1	1
2	42	1	163	54	20.3244	2	1.8	5.94	90.8	9.89	1.74	1	2	1	1	1	2	1	1	1
2	42	1	150	46	20.4444	2	1.64	4.57	130.85	13.81	1.42	1	2	1	1	1	1	1	1	1
2	42	1	154	49	20.6612	2	1.41	4.24	98.06	11.23	2.08	1	2	1	1	1	1	1	1	1
2	42	1	169	60	21.0077	2	1.73	4.49	114.86	13.03	2.86	1	2	1	1	1	1	1	1	1
2	42	1	158	53	21.2306	2	1.34	5.28	79.61	10.32	1.88	1	2	1	1	1	2	1	1	1
1	42	1	172	63	21.2953	2	1.74	4.37	88.95	88.95	1.9	1	4.67	2	1	1	1	1	1	1
2	42	1	165	58	21.3039	2	1.57	5.45	90.68	14.96	1.1	1	2	2	1	1	1	1	1	1
2	42	1	160	55	21.4844	2	1.93	5.58	116.06	13.05	0.98	1	2	1	1	2	1	1	2	1
2	42	1	160	55	21.4844	2	2.1	5.13	143.88	11.19	0.27	1	13.5	1	1	1	2	1	1	1
2	42	1	162	57	21.7193	2	1.5	5.28	110.61	12.36	0.53	1	2	1	2	1	1	1	1	1
2	42	1	170	63	21.7993	2	1.49	4.68	123.06	13.31	4.06	1	2	1	1	1	2	2	1	1
2	42	1	165	60	22.0386	2	1.51	4.22	102.44	12.4	1.86	1	2	2	1	1	2	2	1	1
2	42	1	169	63	22.0581	2	1.44	4.43	100.4	11.54	1.46	1	2	1	1	1	2	1	1	1
2	42	1	167	62	22.231	2	2.04	3.65	123.25	11.08	1.09	1	2	2	2	1	2	1	1	1
2	42	1	158	56	22.4323	2	1.37	5.19	116.78	12.36	1.96	1	2	2	2	1	1	1	1	1
2	42	1	158	56	22.4323	2	1.48	4.09	78.26	9.91	1.22	1	2	2	1	1	1	1	1	1
1	42	1	167	65	23.3067	2	1.36	4.16	85.16	9.71	2.27	1	2	1	1	1	1	1	1	1
2	42	1	152	54	23.3726	2	1.36	4.64	175.82	11.41	1.1	1	2	1	1	1	1	1	1	1
2	42	1	162	62	23.6244	2	1.08	3.42	86.54	10.36	1.79	1	2	2	1	1	2	2	1	1
2	42	1	158	59	23.634	2	1.38	5.19	93.65	12.21	0.77	1	2	1	2	1	1	1	1	1
2	42	1	151	54	23.6832	2	1.36	4.64	175.82	11.41	1.1	1	2	1	1	1	1	1	1	1
2	42	1	155	57	23.7253	2	1.56	5.3	123.42	13.63	1.31	1	4.58	1	1	1	1	1	1	1
1	42	1	174	72	23.7812	2	1.83	4.16	105.85	12.33	0.96	1	2	2	1	1	1	1	1	1
2	41	1	154	45	18.9745	2	1.03				1.19	1	2.59	2	2	1	2	1	1	1
2	41	1	160	50	19.5312	2	1.48	4.36	79.87	9.16	1.31	1	2	2	1	1	2	1	1	1
2	41	1	157	49	19.8791	2	1.28	4.86	109.73	11.08	1.66	1	2	2	2	2	1	1	2	1
2	41	1	168	60	21.2585	2	1.67	5.18	100.87	9.49	1.49	1	2	2	1	1	1	1	1	1
2	41	1	158	54	21.6311	2	1.71	5.07	110.81	11.93	3.7	1	2.51	1	1	1	1	1	1	1
2	41	1	156	53	21.7784	2	1.71	4.91	83.18	7.71	1.79	1	2	2	2	1	2	1	1	1
2	41	1	156	54	22.1893	2					1.1	1	2	2	1	1	1	1	1	1
2	41	1	164	60	22.3081	2					0.25	1	2	2	1	1	2	2	1	1
2	41	1	157	56	22.719	2	1.65	4.86	128.72	12.88	1.75	1	2	1	2	1	1	1	1	1
2	41	1	173	68	22.7204	2	1.44	3.84	117.52	13.7	2.04	1	2	1	2	1	1	1	1	1
2	41	1	167	64	22.9481	2	1.17	4.88	69.39	10.59	0.69	1	2	2	1	2	2	1	2	1
2	41	1	168	65	23.03	2					1	1	2	1	1	1	1	1	1	1
2	41	1	164	62	23.0518	2	1.57	3.72	92.45	8.85	2.69	1	2	1	2	1	1	1	1	1
2	41	1	164	62	23.0518	2	1.37	4.36	89.93	11.9	2.42	1	2	2	1	1	2	1	1	1
2	41	1	160	60	23.4375	2	1.13	4.1	73.37	8.64	1.58	1	2.66	1	1	1	2	1	1	1
2	41	1	166	65	23.5883	2	1.73	4.39	105.32	11.09	2.27	1	2	1	1	1	1	1	1	1
2	41	1	162	62	23.6244	2	1.04	3.95	84.18	9.53	0.68	1	2	1	1	1	1	1	1	1
2	41	1	158	59	23.634	2	1.41	4.24	100.09	10.21	0.81	1	2	1	1	1	1	1	1	1
2	41	1	172	70	23.6614	2	1.23	4.14	89.02	9.99	1.8	1	2	1	1	1	1	1	1	1
2	41	1	160	61	23.8281	2	1.57	3.83	86.3	10.61	2.72	1	2	1	1	1	2	1	1	1
2	41	1	149	53	23.8728	2	1.15	4.28	82.89	9.56	2.74	1	2	1	1	1	1	1	1	1
2	40	1	159	48	18.9866	2	1.6	4.78	112.42	13.04	1.23	1	2	1	2	1	1	1	1	1
2	40	1	162	52	19.8141	2	1.62	4.87	96.23	11.53	1.31	1	2	1	1	1	1	1	1	1
2	40	1	165	54	19.8347	2	1.34	3.84	90.44	8.41	3.09	1	2	1	2	1	1	1	1	1
1	40	1	168	59	20.9042	2					1.12	1	5.74	2	2	1	1	1	1	1
2	40	1	182	70	21.1327	2	1.21	4.13	87.28	10.25	1.48	1	2	1	2	1	2	2	1	1
2	40	1	158	53	21.2306	2	1.19	4.59	118.83	12.02	1.68	1	2	1	2	2	1	1	2	1
1	40	1	172	63	21.2953	2	1.78	4.9	113.08	14.68	3.12	1	2	2	1	1	2	1	1	1
2	40	1	159	54	21.3599	2	1.37	4.57	70.62	10.44	2.06	1	2	2	1	1	1	1	1	1
2	40	1	163	57	21.4536	2	1.64	5.44	98.01	11.21	9.21	2	2	2	2	1	2	1	1	1
2	40	1	158	54	21.6311	2	2.21	5.74	119.39	9.25	1.18	1	2	2	1	2	2	1	2	1
2	40	1	158	55	22.0317	2	1.92	4.78	107.46	11.69	1.56	1	2.36	1	1	1	1	1	1	1
2	40	1	166	62	22.4996	2	1.19	4.37	99.61	12.16	2.03	1	2	2	2	1	2	1	1	1
2	40	1	165	62	22.7732	2	1.28	4.34	109.97	11	3.07	1	2	1	2	1	1	1	1	1
2	40	1	165	62	22.7732	2	1.41	3.77	108.39	12.18	1.98	1	2.2	1	2	1	1	1	1	1
2	40	1	158	57	22.8329	2	1.49	3.77	112.36	11	1.42	1	2.22	2	2	1	1	1	1	1
2	40	1	155	55	22.8928	2	1.02	3.96	64.08	8.1	3.57	1	2	1	1	1	1	1	1	1
2	40	1	163	61	22.9591	2	1.31	4.12	92.27	12.71	0.8	1	2	1	1	1	1	1	1	1
2	40	1	151	53	23.2446	2	1.14	4.16	142.1	11.81	3.48	1	2	2	2	1	2	2	1	1
2	40	1	160	60	23.4375	2	1.13	4.1	73.37	8.64	1.58	1	2.66	1	1	1	2	1	1	1
1	40	1	174	71	23.4509	2	1.68	4.33	86.33	12.13	1.5	1	2	1	1	1	1	1	1	1
1	40	1	174	71	23.4509	2	1.68	4.33	86.33	12.13	1.5	1	2	1	1	1	1	1	1	1
2	40	1	166	65	23.5883	2	1.73	4.39	105.32	11.09	2.27	1	2	1	1	1	1	1	1	1
2	40	1	162	62	23.6244	2	1.04	3.95	84.18	9.53	0.68	1	2	1	1	1	1	1	1	1
2	40	1	158	59	23.634	2	1.41	4.24	100.09	10.21	0.81	1	2	1	1	1	1	1	1	1
2	40	1	172	70	23.6614	2	1.23	4.14	89.02	9.99	1.8	1	2	1	1	1	1	1	1	1
2	40	1	163	63	23.7118	2	1.47	4.3	98.72	10.81	5.5	2	2	2	1	1	2	2	1	1
2	40	1	152	55	23.8054	2	1.39	3.65	130.62	12.41	1.74	1	2	1	2	1	1	1	1	1
2	40	1	160	61	23.8281	2					2.21	1	2	1	1	1	1	1	1	1
1	40	1	176	74	23.8895	2	1.47	5.2	96.4	10.78	1.98	1	2.41	1	2	1	1	1	1	1
2	40	1	161	62	23.9188	2	1.41	4.43	105	12.59	1.6	1	2	1	2	1	1	1	1	1
2	39	1	156	48	19.7239	2	1.27	4.39	87.29	11.07	3.69	1	2	1	1	1	1	1	1	1
2	39	1	161	54	20.8325	2	1.89	4.78	99.42	11.99	2.95	1	2	1	2	1	1	1	1	1
2	39	1	160	55	21.4844	2	1.37	4.72	72.25	12.46	1.12	1	2	2	1	1	1	1	1	1
2	39	1	156	54	22.1893	2	1.77	5.08	113.88	11.78	1.93	1	2	1	1	1	1	1	1	1
2	39	1	167	62	22.231	2	1.96	5.39	113.9	14.1	1.26	1	2	2	1	2	2	1	2	1
2	39	1	167	63	22.5896	2		1.8	114.59	5.31	1.33	1	2	1	1	1	1	1	1	1
2	39	1	160	58	22.6562	2	1.18	4.49	90.21	11.49	0.68	1	2	1	1	1	1	1	1	1
2	39	1	158	58	23.2335	2	1.53	4.85	94.23	10.14	2.53	1	2	2	2	1	1	1	1	1
2	39	1	151	53	23.2446	2	1.14	4.16	142.1	11.81	3.48	1	2	2	2	1	2	2	1	1
2	39	1	164	63	23.4236	2	1.67	4.78	124.61	13.38	4.41	1	2	1	1	1	1	1	1	1
2	39	1	165	64	23.5078	2	1.4	3.82	154.94	9.59	2.68	1	2	1	1	1	1	1	1	1
1	39	1	170	68	23.5294	2	1.64	4.94	113.12	12.03	2.63	1	2.61	1	2	1	1	1	1	1
2	39	1	158	59	23.634	2	1.16	3.53	76.73	12.1	1.82	1	2	2	2	1	1	1	1	1
2	39	1	167	66	23.6652	2	1.14	4.1	67.17	6.98	3.49	1	2	1	1	1	2	1	1	1
2	39	1	165	65	23.8751	2			77.99		1.05	1	2	1	2	1	1	1	1	1
2	39	1	157	59	23.9361	2	1.16	3.53	76.73	12.1	1.82	1	2	2	2	1	1	1	1	1
2	38	1	166	53	19.2336	2	1.36	5.16	97.14	10.55	1.15	1	2	1	2	1	1	1	1	1
2	38	1	159	49	19.3821	2	1.37	4.93	85.9	10.95	1.78	1	2	1	1	1	1	1	1	1
2	38	1	162	52	19.8141	2	1.54	4.89	85.1	9.93	4.13	1	2	1	1	1	2	1	1	1
1	38	1	168	56	19.8413	2					1.6	1	2	1	1	1	1	1	1	1
2	38	1	164	56	20.8209	2	1.27	4.99	77.38	12.49	2.13	1	2	2	1	1	2	1	1	1
2	38	1	160	54	21.0938	2	1.52	4	97.58	10.48	3.06	1	2	2	2	1	2	1	1	1
2	38	1	157	52	21.0962	2	1.11				1.03	1	2	1	1	1	1	1	1	1
1	38	1	164	57	21.1927	2	1.58	4.34	109.45	10.75	4.94	2	4.28	1	1	1	2	2	1	1
2	38	1	161	55	21.2183	2	1.9	5.08	110.06	12.83	0.8	1	2	1	1	1	2	1	1	1
2	38	1	159	54	21.3599	2					2.36	1	2	2	1	2	2	1	2	1
2	38	1	163	58	21.83	2	1.35	4.52	109.59	13.5	1.38	1	2.6	1	1	1	1	1	1	1
2	38	1	160	56	21.875	2					2.21	1	2	2	1	1	1	1	1	1
1	38	1	175	67	21.8776	2					2.31	1	2	2	1	1	2	2	1	1
2	38	1	166	61	22.1367	2	1.55	4.35	79.45	10.05	1.92	1	2	2	1	1	2	2	1	1
1	38	1	169	64	22.4082	2	1.65	3.94	115.72	12.13	0.96	1	2	2	2	2	2	2	2	1
2	38	1	163	60	22.5827	2	1.37	4.3	99.87	12.4	4.22	1	2	1	1	1	1	1	1	1
2	38	1	161	59	22.7615	2	1.54	4.99	88.42	11.39	3.82	1	2	1	2	1	2	1	1	1
2	38	1	165	62	22.7732	2	1.8	4.64	98.7	9.18	1.1	1	2	1	2	1	1	1	1	1
2	38	1	165	62	22.7732	2	1.77	5.05	111.77	14.68	0.48	1	2	1	2	1	2	1	1	1
2	38	1	174	69	22.7903	2	2.03	5.56	105.39	11.25	1.48	1	2	2	1	1	1	1	1	1
2	38	1	158	58	23.2335	2	1.85	5.2	112.77	14.47	2.61	1	2	1	2	1	1	1	1	1
2	38	1	164	63	23.4236	2	1.67	4.78	124.61	13.38	4.41	1	2	1	1	1	1	1	1	1
2	38	1	165	64	23.5078	2	1.4	3.82	154.94	9.59	2.68	1	2	1	1	1	1	1	1	1
1	38	1	170	68	23.5294	2	1.64	4.94	113.12	12.03	2.63	1	2.61	1	2	1	1	1	1	1
2	38	1	167	66	23.6652	2	1.69	4.45	90.21	10.73	1.62	1	2	1	1	1	2	1	1	1
2	38	1	159	60	23.7332	2	1.65	4.62	86.37	10.63	1.6	1	2	1	2	1	2	2	1	1
2	38	1	168	67	23.7387	2	1.32	4.52	126.8	13.98	3.43	1	2	1	1	1	1	1	1	1
2	38	1	165	65	23.8751	2	1.62	5.2	91.72	9.57	3.78	1	2	2	1	1	1	1	1	1
2	37	1	153	46	19.6506	2	1.35	4.31	85.9	11.31	1.33	1	2	1	2	1	1	1	1	1
2	37	1	167	55	19.721	2	1.51	4.7	92.95	9.75	1.7	1	2	2	1	1	2	1	1	1
2	37	1	158	50	20.0288	2	2.1	5.32	117.85	11.2	3.16	1	2	1	1	1	1	1	1	1
2	37	1	159	52	20.5688	2	1.4	3.88	98.26	13.6	0.61	1	2	1	1	1	2	1	1	1
2	37	1	164	56	20.8209	2	1.47	3.97	99.43	11.9	4.06	1	2	1	2	1	1	1	1	1
2	37	1	167	59	21.1553	2	1.33	5.23	90.46	13.88	1.89	1	2	1	2	1	1	1	1	1
2	37	1	172	63	21.2953	2	2.12	7.7	117.97	8.67	0.34	1	2	1	1	1	2	1	1	1
2	37	1	157	53	21.5019	2					4.85	1	2	2	2	1	2	2	1	1
2	37	1	162	57	21.7193	2	1.32	4.39	83.76	11.23	4.34	1	2	2	1	2	2	2	2	1
2	37	1	162	58	22.1003	2	1.41	4.14	88.28	10.31	1.31	1	2	1	2	1	1	1	1	1
2	37	1	156	55	22.6003	2	1.41	4.11	94.33	12.27	2.45	1	2	2	1	1	1	1	1	1
2	37	1	154	54	22.7694	2	1.38	4	102.29	10.84	3.51	1	4.49	1	1	1	1	1	1	1
2	37	1	166	63	22.8625	2	1.49	5.5	91.17	12.25	4.03	1	2	1	2	1	1	1	1	1
2	37	1	147	50	23.1385	2	1.45	4.81	103.9	10.43	2.99	1	2	1	1	1	1	1	1	1
2	37	1	163	62	23.3355	2	1.43	3.65	76.97	11.18	2.49	1	2	1	2	2	2	1	2	1
2	37	1	160	60	23.4375	2	1.75	6.07	97.32	9.39	2.87	1	2	1	1	1	2	1	1	1
2	37	1	167	66	23.6652	2	1.41	4.89	78.77	10.07	4.63	1	2	2	1	1	2	2	1	1
2	36	1	157	48	19.4734	2	1.64	5.39	103	9.97	1.81	1	2	1	1	1	2	1	1	1
2	36	1	164	54	20.0773	2	1.15	3.62	84.72	10.09	1.29	1	2	1	1	1	1	1	1	1
2	36	1	159	51	20.1733	2	1.29	4.48	87.88	10.07	1.68	1	3.72	1	1	1	1	1	1	1
2	36	1	167	57	20.4382	2	1.42	4.34	100.1	9.54	3.43	1	2	1	1	1	1	1	1	1
2	36	1	164	55	20.4491	2	1.1		70.69		2.31	1	2	1	1	1	1	1	1	1
2	36	1	168	58	20.5499	2	1.83	5.39	90.98	11.77	3.93	1	2	1	2	1	2	1	1	1
2	36	1	161	54	20.8325	2	1.34	3.63	67.98	9.43	1.88	1	2	2	1	1	2	1	1	1
2	36	1	163	56	21.0772	2	1.44	4.56	101.53	10.56	0.63	1	2	2	1	1	2	2	1	1
2	36	1	170	61	21.1073	2	1.63	6.35	125.99	11.86	1.59	1	2	1	2	1	1	1	1	1
2	36	1	155	51	21.2279	2	1.42	5.05	78.68	10.21	4.01	1	2	2	2	2	2	2	2	1
2	36	1	165	58	21.3039	2	1.86	4.44	110.12	12.2	2.51	1	2	1	1	1	2	1	1	1
2	36	1	167	60	21.5139	2	1.5	4.77	115.3	11.84	0.69	1	2.28	2	1	1	2	1	1	1
2	36	1	164	59	21.9363	2	1.89	5.12	95.16	12.64	2.36	1	2	1	2	1	2	1	1	1
2	36	1	160	58	22.6562	2	1.68	4.84	87.01	10.59	1.14	1	2	1	2	1	2	1	1	1
2	36	1	159	58	22.9421	2	1.77	4.77	121.73	12.14	1.93	1	2	1	1	1	1	1	1	1
2	36	1	162	61	23.2434	2					1.78	1	2	1	2	1	1	1	1	1
2	36	1	151	53	23.2446	2	1.71	4.87	113.87	13.67	1.44	1	2	2	1	1	1	1	1	1
2	36	1	163	62	23.3355	2	1.43	3.65	76.97	11.18	2.49	1	2	1	2	2	2	1	2	1
2	36	1	160	60	23.4375	2	1.75	6.07	97.32	9.39	2.87	1	2	1	1	1	2	1	1	1
2	36	1	172	70	23.6614	2	1.19	4.43	98.65	11.17	1.48	1	2	1	2	1	1	1	1	1
2	36	1	172	70	23.6614	2	1.19	4.43	98.65	11.17	1.48	1	2	1	2	1	1	1	1	1
1	36	1	168	67	23.7387	2	2.25	5.44	125.24	13.02	1.3	1	2	1	1	1	2	1	1	1
1	36	1	174	72	23.7812	2	1.29	4.01	68.74	9.97	1.62	1	2	2	1	1	2	1	1	1
2	35	1	170	60	20.7612	2					3.51	1	2	1	2	1	2	1	1	1
2	35	1	157	54	21.9076	2	1.38	4.76	81.14	10.01	1.73	1	2	1	1	1	1	1	1	1
2	35	1	159	56	22.151	2	0.98	4.25	87.65	12.29	1.15	1	2	1	1	1	1	1	1	1
2	35	1	174	68	22.46	2	1.73	4.11	85.04	9.8	1.55	1	2	2	1	1	2	1	1	1
1	35	1	185	78	22.7904	2	1.47	4.89	93.78	14.89	1.72	1	2	1	1	1	2	1	1	1
2	35	1	162	60	22.8624	2	1.56	4.97	93.26	10.99	2.33	1	2	2	2	1	2	1	1	1
2	35	1	151	53	23.2446	2	1.71	4.87	113.87	13.67	1.44	1	2	2	1	1	1	1	1	1
2	35	1	183	78	23.2912	2	1.58	4.25	104.49	14.64	1.04	1	2	2	1	1	2	2	1	1
2	35	1	183	78	23.2912	2	1.58	4.25	104.49	14.64	1.04	1	2	2	1	1	2	2	1	1
2	35	1	163	62	23.3355	2	1.37	5.02	97.07	10.68	0.99	1	2	2	1	1	1	1	1	1
2	35	1	157	58	23.5304	2	1.54	5.06	65.85	12.94	3.18	1	2	1	1	1	1	1	1	1
2	35	1	162	62	23.6244	2					1.78	1	2	1	2	1	1	1	1	1
2	35	1	156	58	23.833	2	1.54	5.06	65.85	12.94	3.18	1	2	1	1	1	1	1	1	1
2	35	1	165	65	23.8751	2	1.44	3.85	87.33	11.62	2.93	1	2	2	2	1	1	1	1	1
1	34	1	164	50	18.5901	2	1.29	3.66	91.24	9.45	2.26	1	2	2	2	1	2	1	1	1
2	34	1	163	52	19.5717	2	1.59	4.67	97.92	11.63	0.91	1	2	1	2	2	2	2	2	1
2	34	1	168	56	19.8413	2	1.54	5.03	122.81	13.36	1.79	1	2	2	1	1	2	1	1	1
2	34	1	165	55	20.202	2	1.16	3.99	77.04	12.77	3.38	1	2	1	1	1	1	1	1	1
1	34	1	167	58	20.7967	2					1.73	1	4.46	1	1	1	1	1	1	1
2	34	1	169	60	21.0077	2	1.45	5.19	85.76	8.33	6.17	2	2	1	1	1	1	1	1	1
2	34	1	167	59	21.1553	2	1.33	4.51	91.05	9.11	2.95	1	2	2	1	2	2	1	2	1
2	34	1	164	57	21.1927	2	1.54	5.15	91.37	10.81	1.69	1	2	1	1	1	1	1	1	1
1	34	1	175	66	21.551	2	1.14	4.78	67.87	9.55	1.62	1	2	1	1	1	1	1	1	1
2	34	1	158	55	22.0317	2	1.55	4.18	100.24	11.98	1.54	1	2	1	1	1	1	1	1	1
2	34	1	157	55	22.3133	2	1.62	4.83	89.4	10.19	2.84	1	2	1	1	1	2	1	1	1
2	34	1	159	57	22.5466	2	1.72	4.72	103.17	13.08	0.88	1	2	2	1	1	1	1	1	1
2	34	1	165	63	23.1405	2					2.47	1	2	1	1	1	2	1	1	1
1	34	1	158	58	23.2335	2	1.42	4.29	83.69	10.59	2.88	1	2	2	1	1	2	2	1	1
2	34	1	163	62	23.3355	2	1.37	5.02	97.07	10.68	0.99	1	2	2	1	1	1	1	1	1
2	34	1	158	59	23.634	2	1.47	5.64	96.78	12.79	3.18	1	2	2	1	1	2	1	1	1
2	33	1	157	49	19.8791	2	1.49	4.41	104.1	11.71	0.94	1	2	2	1	1	1	1	1	1
2	33	1	164	55	20.4491	2	1.27	4.08	86.32	9.71	2.93	1	2	1	1	1	2	1	1	1
2	33	1	169	60	21.0077	2	1.31	3.98	123.27	15.61	2.38	1	4.91	1	1	1	1	1	1	1
2	33	1	170	64	22.1453	2					3	1	2	1	2	1	1	1	1	1
2	33	1	158	56	22.4323	2	1		75.72		1.72	1	2	2	1	1	2	1	1	1
2	33	1	166	62	22.4996	2	1.43	4.52	102.01	11.59	1.44	1	2	1	2	1	2	1	1	1
2	33	1	154	55	23.1911	2	1.49	3.87	112.81	12.5	1.05	1	2	1	1	1	1	1	1	1
1	33	1	158	58	23.2335	2	1.42	4.29	83.69	10.59	2.88	1	2	2	1	1	2	2	1	1
2	33	1	166	65	23.5883	2	1.36	5.21	92.16	2.32	2.32	1	2	2	1	1	2	2	1	1
2	33	1	158	59	23.634	2	1.47	5.64	96.78	12.79	3.18	1	2	2	1	1	2	1	1	1
1	33	1	178	75	23.6713	2	1.69	4.67	98.65	9.02	1.35	1	2	1	1	1	1	1	1	1
2	32	1	162	50	19.052	2	1.15	3.96	74.23	11.34	3.47	1	2	2	1	1	1	1	1	1
2	32	1	157	47	19.0677	2	1.32	4.49	77.71	10.25	1.29	1	2	1	2	1	1	1	1	1
2	32	1	165	53	19.4674	2	1.12	4.36	79.6	12.07	1.98	1	2	1	1	1	2	1	1	1
2	32	1	150	45	20	2	1.12	4.23	87.3	10.11	2.7	1	2	1	1	1	2	1	1	1
2	32	1	166	57	20.6852	2	1.24	4.5	70.01	8.34	5.7	2	2	1	1	1	1	1	1	1
2	32	1	162	56	21.3382	2	1.18	4.2	83.9	11.8	6.71	2	2	2	2	1	1	1	1	1
2	32	1	162	57	21.7193	2	1.52	4.14	92.09	9.39	0.52	1	2.55	2	1	1	1	1	1	1
2	32	1	164	59	21.9363	2	1.7	4.41	95.17	10.06	2.91	1	2	1	1	1	2	1	1	1
2	32	1	168	62	21.9671	2	1.21	4.35	89.89	12.21	2.18	1	2	1	1	1	1	1	1	1
2	32	1	165	60	22.0386	2	1.57	4.98	95.58	9.58	2.43	1	2	1	1	1	1	1	1	1
2	32	1	159	56	22.151	2					2.5	1	2	1	1	2	1	1	2	1
2	32	1	161	58	22.3757	2	1.58	3	93.38	8.29	2.64	1	2	2	1	1	1	1	1	1
2	32	1	164	62	23.0518	2	1.22	4.14	99.38	13.17	2.9	1	2	2	1	1	2	1	1	1
2	32	1	173	70	23.3887	2	1.86	4.96	80.05	9.64	1.86	1	2	2	1	1	1	1	1	1
2	32	1	166	65	23.5883	2	1.36	5.21	92.16	2.32	2.32	1	2	2	1	1	2	2	1	1
2	31	1	164	56	20.8209	2	1.43	3.98	81.99	10.32	2.29	1	2	2	2	1	2	2	1	1
2	31	1	157	55	22.3133	2	1.5	4.09	97.99	9.34	2.43	1	2	1	2	1	2	1	1	1
2	31	1	166	63	22.8625	2	1.9	5.78	105.6	9.26	1.48	1	2	1	2	1	2	1	1	1
2	31	1	162	61	23.2434	2	1.68	4.3	97.5	10.47	4.89	2	2	1	1	1	1	1	1	1
2	31	1	173	70	23.3887	2	1.86	4.96	80.05	9.64	1.86	1	2	2	1	1	1	1	1	1
2	31	1	173	71	23.7228	2	1.4	3.8	97.94	13.81	2	1	3.25	2	1	1	1	1	1	1
2	31	1	155	57	23.7253	2	1.69	4.96	99.37	12.73	1.28	1	2	1	1	1	1	1	1	1
2	31	1	157	59	23.9361	2	2.7	4.91	142.61	12.08	0.79	1	2	2	1	1	2	1	1	1
2	30	1	154	51	21.5045	2	1.34	4.05	101.68	9.86	3.71	1	2	2	1	1	2	2	1	1
2	30	1	154	52	21.9261	2	1.58	3.97	82.86	11.83	1.59	1	2	1	2	1	1	1	1	1
1	30	1	172	65	21.9713	2					1.51	1	6.78	2	1	1	2	2	1	1
2	30	1	162	60	22.8624	2	1.68	4.3	97.5	10.47	4.89	2	2	1	1	1	1	1	1	1
2	30	1	168	65	23.03	2	1.5	3.64	99.25	11.8	1.86	1	2	1	1	1	2	1	1	1
2	30	1	168	66	23.3844	2	1.5	3.64	99.25	11.8	1.86	1	2	1	1	1	2	1	1	1
1	30	1	172	70	23.6614	2	1.93	5.73	107.89	12.63	2.56	1	2	1	1	1	2	2	1	1
1	30	1	171	70	23.939	2	1.93	5.73	107.89	12.63	2.56	1	2	1	1	1	2	2	1	1
2	29	1	170	55	19.0311	2	1.4	4.71	83.47	11.61	1.3	1	2	1	2	1	1	1	1	1
2	29	1	163	52	19.5717	2	1.39	4.16	86.31	10.13	4.34	1	2	2	1	1	2	2	1	1
2	29	1	165	54	19.8347	2	1.68	5.4	80.56	9.23	1.32	1	2	2	1	1	2	1	1	1
2	29	1	162	53	20.1951	2	2.39	4.41	116.82	10.28	1.21	1	2	2	1	1	2	1	1	1
2	29	1	165	56	20.5693	2	1.48	4.4	106.8	11.01	3.34	1	2.16	2	2	1	2	2	1	1
2	29	1	169	61	21.3578	2	1.56	5.06	97.29	38.65	0.78	1	2	2	1	2	2	1	2	1
2	29	1	160	55	21.4844	2	1.35	4.65	86.79	12.28	2.17	1	2	2	2	1	2	1	1	1
2	29	1	159	55	21.7555	2	1.92	4.59	131.16	10.38	2.22	1	2	2	2	1	2	1	1	1
1	29	1	188	77	21.7859	2	1.97	5.37	142.32	14.69	0.23	1	2	2	2	2	2	2	2	1
2	29	1	162	58	22.1003	2	1.55	5.2	89.53	11.6	0.76	1	2	1	1	1	1	1	1	1
1	29	1	183	75	22.3954	2	1.59	4.73	114.24	13.29	1.32	1	2.58	2	1	1	2	1	1	1
1	29	1	170	66	22.8374	2	1.57	4.44	92.21	12.26	1.05	1	2	2	1	1	2	1	1	1
1	29	1	171	67	22.913	2	1.56	5.09	77.39	11.6	0.71	1	6.68	1	1	1	2	1	1	1
2	29	1	160	60	23.4375	2	1.4	4.05	75.64	10.15	2.37	1	2	1	1	1	1	1	1	1
2	29	1	171	70	23.939	2	1.78	4.91	132.7	15.89	0.03	1	2	2	2	1	2	1	1	1
2	28	1	168	54	19.1327	2	1.27	3.97	93.46	9.85	2.5	1	2	2	1	1	2	1	1	1
2	28	1	160	49	19.1406	2	1.49	4.48	134.73	13.68	2.92	1	2	1	2	1	2	1	1	1
2	28	1	164	55	20.4491	2	1.45	5.45	122.66	14.98	2.95	1	2	1	2	1	1	1	1	1
2	28	1	153	48	20.5049	2					1.32	1	7	2	1	1	2	2	1	1
2	28	1	169	60	21.0077	2	1.18	5.19	77.85	11.42	1.13	1	2	2	1	1	2	2	1	1
2	28	1	157	56	22.719	2					1.44	1	2	1	1	1	2	1	1	1
1	28	1	171	67	22.913	2	1.46	4.84	82.37	14.41	2.62	1	2	2	1	1	2	2	1	1
1	28	1	172	68	22.9854	2	0.98	4.71	89.2	12.91	4.42	1	2	1	1	1	1	1	1	1
1	28	1	171	68	23.255	2	1.46	4.84	82.37	14.41	2.62	1	2	2	1	1	2	2	1	1
2	28	1	160	60	23.4375	2	1.4	4.05	75.64	10.15	2.37	1	2	1	1	1	1	1	1	1
2	27	1	167	55	19.721	2	1.21	4.38	77.54	12.96	2.03	1	2	1	1	1	2	1	1	1
2	27	1	152	46	19.91	2	2.01	6.01	118.82	12.59	2.38	1	2	2	1	1	1	1	1	1
2	27	1	161	52	20.061	2	1.46	4.4	107.77	10.04	4.06	1	2	1	1	1	1	1	1	1
2	27	1	174	62	20.4783	2	1.64	5.04	126.72	14.39	2.07	1	2	2	2	1	2	1	1	1
2	27	1	169	59	20.6575	2	1.59	4.76	106.32	12.25	1.51	1	3.19	1	1	1	2	2	1	1
2	27	1	161	55	21.2183	2	1.39	4.06	69.54	10.16	2.84	1	2	2	1	1	2	1	1	1
2	27	1	158	55	22.0317	2	1.79	6.46	92.08	10.75	3.5	1	2	1	2	1	2	1	1	1
2	27	1	163	59	22.2063	2	1.25	4.96	89.52	14.61	1.87	1	2	1	1	1	2	1	1	1
2	27	1	164	60	22.3081	2	1.4	4.8	103.62	11.2	1.42	1	2	2	2	1	2	2	1	1
2	27	1	154	54	22.7694	2	1.49	5.6	157.72	9.62	2.35	1	2	1	2	1	2	1	1	1
2	27	1	175	71	23.1837	2	1.2	3.86	88.97	12.18	4.04	1	2	1	1	1	1	1	1	1
2	27	1	160	60	23.4375	2	1.59	5.07	100.44	9.19	2.22	1	2	2	1	1	1	1	1	1
2	27	1	160	60	23.4375	2	1.59	5.07	100.44	9.19	2.22	1	2	2	1	1	1	1	1	1
2	26	1	172	59	19.9432	2	1.94	4.46	112.7	12.3	1.29	1	3.95	2	1	1	1	1	1	1
2	26	1	161	54	20.8325	2	1.88	4.55	81.67	9.92	5.23	2	2	2	1	1	2	2	1	1
1	26	1	181	70	21.3669	2	1.98	5.53	104.09	13.14	1.22	1	2	2	1	1	2	1	1	1
2	26	1	173	68	22.7204	2	1.4	5.3	83.37	13.11	2.6	1	2	1	1	1	2	1	1	1
2	26	1	163	63	23.7118	2	1.32	4.71	100.68	9.91	1.69	1	2	1	1	1	2	1	1	1
2	25	1	169	55	19.257	2	1.46	4.74	70.29	10.09	4.09	1	2	1	2	1	2	1	1	1
1	25	1	170	57	19.7232	2					2.33	1	2	1	1	1	2	1	1	1
2	25	1	165	58	21.3039	2	1.3	4.92	104.64	11.39	0.79	1	2	1	1	1	2	1	1	1
2	25	1	158	54	21.6311	2	1.41	5.26	95.18	12.82	1.82	1	2	2	2	1	2	2	1	1
2	25	1	168	62	21.9671	2	1.7	4.36	186.98	13.39	1.73	1	2	2	1	1	2	1	1	1
1	25	1	170	66	22.8374	2	1.69	4.58	95.92	13.82	1.95	1	4.38	2	1	1	2	2	1	1
2	25	1	156	57	23.4221	2	1.73	5.63	118.66	12.8	7.24	2	2	2	2	2	2	2	2	1
2	24	1	158	52	20.83	2	1.62	4.23	102.66	12.72	1.73	1	2	2	1	1	2	2	1	1
2	24	1	181	69.9	21.3363	2	1.75	4.86	91.99	13.59	1.28	1	2	1	1	1	2	1	1	1
2	24	1	159	54	21.3599	2	1.37	5.13	109.29	11.86	0.63	1	2.57	1	1	1	1	1	1	1
2	24	1	156	53	21.7784	2	1.33	4.14	89.33	9.37	6.84	2	2	2	2	2	2	2	2	1
2	24	1	165	61	22.4059	2	1.36	4.68	85.63	10.17	2.47	1	2	1	1	1	2	1	1	1
2	24	1	156	57	23.4221	2	1.73	5.63	118.66	12.8	7.24	2	2	2	2	2	2	2	2	1
2	23	1	165	51	18.7328	2	1.49	4.33	87.03	9.82	2.23	1	2	2	2	1	2	2	1	1
1	23	1	185	70	20.4529	2	1.5	4.91	96.7	13.57	2.21	1	2	1	1	1	2	1	1	1
2	23	1	178	65	20.5151	2	0.97	3.86	72.02	9.77	1.27	1	2	2	1	1	2	2	1	1
2	23	1	162	57	21.7193	2	1.79	4.77	90.94	11.38	1.79	1	2	2	1	1	2	2	1	1
1	23	1	175	68	22.2041	2					4.77	1	2	2	1	2	2	2	2	1
2	23	1	161	60	23.1473	2	1.62	4.67	96.02	9.46	1.63	1	2	1	1	2	2	1	2	1
2	23	1	171	70	23.939	2	1.11	4.42	76.97	11.1	1.19	1	2	2	1	1	2	2	1	1
2	22	1	156	54	22.1893	2	1.25	4.55	91.47	12.42	2.89	1	2	2	1	2	2	1	2	1
1	22	1	164	60	22.3081	2	2	5.13	123.04	12.1	0.96	1	2	2	1	1	2	2	1	1
1	22	1	182	76	22.9441	2	1.34	5.2	96.48	15.06	1.59	1	2	2	1	2	2	2	2	1
2	20	1	165	64	23.5078	2	1.43	4.12	97.96	12.35	1.6	1	2	2	1	1	2	1	1	1
1	19	1	178	59	18.6214	2	1.88	4.37	91.83	9.98	4.4	1	5.23	2	2	1	2	2	1	1
2	19	1	162	60	22.8624	2					2.56	1	2.08	1	1	1	1	1	1	1
2	19	1	165	64	23.5078	2	1.43	4.12	97.96	12.35	1.6	1	2	2	1	1	2	1	1	1
2	54	1	163	49	18.4425	1	1.55	4.45	122.2	11.04	1	1	2	2	1	1	2	1	1	1
2	50	1	155	43	17.898	1	1.23	3.74	89.22	11	1.06	1	2	1	2	1	2	1	1	1
2	48	1	158	40	16.0231	1	1.12	4.2	107.3	9.45	1.1	1	2	2	1	1	1	1	1	1
2	44	1	150	56	24.8889	1	1.74	6.25	162.33	31.32	0.04	1	2	1	2	1	1	1	1	1
2	34	1	158	46	18.4265	1	1.31	4.22	74.97	10.08	11.09	2	2	2	1	1	1	1	1	1
2	31	1	158	45	18.026	1	1.08				3.69	1	2	1	1	1	2	2	1	1
2	29	1	159	44	17.4044	1	1.47	5.44	92.95	9.54	2.71	1	2	2	1	1	2	1	1	1
2	25	1	157	42	17.0392	1	1.38	4.2	109.39	15.23	1.28	1	2	1	1	1	1	1	1	1
2	25	1	162	47	17.9089	1					1.72	1	2	1	1	1	1	1	1	1
2	24	1	173	49	16.3721	1	1.4	4.31	91.46	10.71	1.14	1	2.86	2	2	1	2	2	1	1
2	23	1	162	42	16.0037	1					2.04	1	1	2	1	1	1	1	1	1
2	23	1	183	55	16.4233	1	1.68	4.49	107.03	9.9	3.19	1	2	2	2	1	2	2	1	1
2	23	1	159	46	18.1955	1	1.9	4.53	84.41	8.57	2.69	1	2	2	1	2	2	2	2	1
2	20	1	180	56	17.284	1	1.54	3.92	100.18	10.06	2.68	1	2.6	2	2	1	2	1	1	1
2	70	2	165	84	30.854	4	0.89	3.76	98.68	11.16	3.06	1	2	2	1	1	1	1	1	1
2	68	2	155	73	30.385	4	1.67	4.15	114.26	13.15	1.22	1	2	1	1	1	1	1	1	1
2	67	2	158	73	29.2421	4	1.23	3.69	86.85	10.26	1.66	1	2	2	2	2	2	1	2	1
2	67	2	154	70	29.5159	4	1.77	5.28	102.9	11.61	1.24	1	2	2	2	2	2	2	2	1
2	66	2	167	85	30.478	4	0.96	3.8	88.51	11.55	4.55	1	2	2	1	1	1	1	1	1
2	66	2	155	75	31.2175	4					2.21	1	2	2	2	2	2	2	2	2
2	66	2	151	73	32.0161	4					2.21	1	2	2	2	2	2	2	2	2
2	66	2	153	76	32.4661	4					2.21	1	2	2	2	2	2	2	2	2
2	66	2	151	75	32.8933	4	1.04	4.07	101.67	10.83	1.38	1	2	2	2	1	2	2	1	1
2	66	2	151	75	32.8933	4					2.21	1	2	2	2	2	2	2	2	2
2	65	2	153	66	28.1943	4	1.67	5.12	109.2	11.38	1.2	1	2	1	2	1	2	1	1	1
2	65	2	152	68	29.4321	4	1.39	4.58	97.12	12.2	4.35	1	2	2	2	2	1	1	2	1
2	64	2	152	68	29.4321	4	1.54	4.69	102.42	10.22	5.57	2	2	2	1	2	1	1	2	1
2	64	2	155	74	30.8012	4	1.46	4.09	93.5	11.01	3.34	1	2	1	1	1	1	1	1	1
2	64	2	154	74	31.2026	4	1.33	4.22	96.02	12.81	3.14	1	2	1	1	1	1	1	1	1
2	63	2	156	69	28.3531	4	1.51	4.1	101.54	10.76	1.78	1	2	2	1	2	2	1	2	2
2	63	2	155	69	28.7201	4	1.51	4.1	101.54	10.76	1.78	1	2	2	1	2	2	1	2	2
2	63	2	156	70	28.764	4	1.51	4.1	101.54	10.76	1.78	1	2	2	1	2	2	1	2	2
2	63	2	156	70	28.764	4	1.2	4.99	87.65	10.14	2.8	1	2	2	1	1	1	1	1	1
2	63	2	157	71	28.8044	4	1.51	4.1	101.54	10.76	1.78	1	2	2	1	2	2	1	2	2
2	63	2	156	72	29.5858	4	1.51	4.1	101.54	10.76	1.78	1	2	2	1	2	2	1	2	2
2	63	2	159	75	29.6665	4	1.28	4.61	101.01	10.11	1.4	1	2	1	1	1	2	1	1	1
2	63	2	154	76	32.0459	4	1.45	4.15	100.04	12.77	0.85	1	2	2	1	1	1	1	1	1
2	63	2	158	85	34.049	4	1.16	3.3	82.66	11.46	1.15	1	2	2	1	2	2	2	2	1
2	62	2	152	67	28.9993	4	1.13	3.53	101.01	13.53	1.33	1	2	1	1	1	1	1	1	1
2	62	2	155	70	29.1363	4	1.81	4.72	113.49	12.45	2.81	1	2	1	1	2	1	1	2	1
1	62	2	169	87	30.4611	4					1.11	1	3.17	2	1	1	2	1	1	1
1	62	2	169	91	31.8616	4					1.34	1	2	2	2	1	1	1	1	1
2	61	2	166	79	28.6689	4	1.22	4.07	91.69	10.68	2.24	1	2	1	1	1	1	1	1	1
2	61	2	159	75	29.6665	4	1.4	4.68	108.14	11.47	0.68	1	2	1	2	1	1	1	1	1
2	61	2	165	84	30.854	4	1.41	4.01	84.92	9.1	8.69	2	2	1	1	2	2	2	2	1
2	61	2	165	84	30.854	4	1.6	4.39	83.82	9.69	3.78	1	2	1	1	1	1	1	1	1
1	61	2	161	81	31.2488	4	1.48	4.83	87.89	12.61	1.3	1	4.81	1	1	1	1	1	1	1
2	60	2	163	75	28.2284	4	1.61	4.91	104.99	10.91	2.47	1	2	1	1	1	1	1	1	1
2	60	2	157	70	28.3987	4	1.4	4.17	118.81	14.03	3.21	1	2	1	1	1	1	1	1	1
2	60	2	157	71	28.8044	4	1.43	3.95	86.66	11.12	2.82	1	2	1	1	1	2	1	1	1
2	60	2	166	80	29.0318	4					2.56	1	2	1	1	1	1	1	1	1
2	60	2	154	69	29.0943	4					1.59	1	2	2	1	1	2	1	1	1
1	60	2	174	90	29.7265	4	1.73	3.7	79.97	8.74	2.54	1	2	2	1	1	2	1	1	1
2	60	2	164	80	29.7442	4	1.49	4.33	101.92	12.38	0.94	1	2	1	1	1	1	1	1	1
2	60	2	163	83	31.2394	4	1.65	3.66	102.4	8.11	3.2	1	2	1	1	1	1	1	1	1
2	59	2	158	70	28.0404	4	1.34	4.42	102.76	11.65	2.9	1	2	1	1	1	1	1	1	1
2	59	2	159	72	28.4799	4	1.42	4.61	144.95	12.77	1.37	1	2	1	1	1	1	1	1	1
2	59	2	162	75	28.578	4	1.36	3.95	92.13	9.13	2.55	1	2	1	2	1	2	2	1	1
1	58	2	170	81	28.0277	4	1.6	4.36	108.71	13.49	5.07	2	2.46	1	1	1	2	1	1	1
2	58	2	154	67	28.251	4	1.79	5.01	106.6	11.67	1.89	1	2	2	1	1	2	1	1	1
1	58	2	154	67	28.251	4	1.61	4.57	94.26	13.17	2.71	1	4.08	2	1	1	2	2	1	1
2	58	2	159	74	29.271	4	1.53	5.28	114.82	10.84	1.19	1	2	1	1	1	1	1	1	1
1	58	2	167	82	29.4023	4	1.31	5	77.53	11.92	1.91	1	2	1	1	1	1	1	1	1
1	58	2	169	85	29.7609	4	1.27	4.04	93.93	11.01	1.59	1	2	1	1	1	1	1	1	1
1	58	2	176	94	30.3461	4	1.44	4.97	90.67	9.37	3.37	1	6.07	1	1	1	1	1	1	1
2	58	2	161	81	31.2488	4	1.5	5.19	113.71	12.18	0.99	1	2	1	1	1	1	1	1	1
2	58	2	151	88	38.5948	4	1.01				1.81	1	2	1	1	1	1	1	1	1
2	57	2	158	70	28.0404	4	1.45	5.89	105.96	13.15	1.43	1	2	2	2	1	2	2	1	1
2	57	2	152	65	28.1337	4	1.67	4.57	68.62	8.47	4.88	2	2	1	1	1	2	2	1	1
2	57	2	152	65	28.1337	4	1.71	4.54	98.51	9.64	3.55	1	2	2	2	1	1	1	1	1
2	57	2	156	69	28.3531	4	1.51	4.29	105.31	9.62	2.4	1	2	2	1	1	2	2	1	1
2	57	2	157	71	28.8044	4	1.52	4.31	98.24	10.84	0.49	1	2	1	1	1	1	1	1	1
2	57	2	159	73	28.8754	4	1.25	3.5	77.63	11.1	1.81	1	2	2	1	1	2	1	1	1
2	57	2	154	70	29.5159	4	1.63	4.75	106.24	12.31	2.12	1	2	2	1	1	1	1	1	1
2	57	2	160	84	32.8125	4	1.73	5.01	89.75	10	3.59	1	2	2	1	1	1	1	1	1
2	57	2	157	87	35.2955	4	1.51	4.86	107.63	11.16	3.12	1	2	1	1	1	1	1	1	1
2	56	2	164	78	29.0006	4					1.04	1	2	1	2	1	1	1	1	1
2	56	2	157	72	29.2101	4	1.52	3.91	112.4	12.01	5.65	2	2	1	2	1	1	1	1	1
2	56	2	166	81	29.3947	4	1.38	4.33	95.16	12.2	0.9	1	2	2	1	1	2	1	1	1
1	56	2	168	84	29.7619	4	1.44	4.6	84.65	13.29	1.36	1	2	1	1	1	1	1	1	1
1	56	2	173	93	31.0735	4	1.53	4.14	90.23	11.88	3.13	1	2	1	2	1	2	2	1	1
2	56	2	166	86	31.2092	4	1.84	4.49	109.69	10.77	6.28	2	2	2	2	2	1	1	2	1
1	56	2	182	104	31.3972	4	1.39	4.26	101.08	14.46	1.81	1	2	2	1	1	1	1	1	1
2	55	2	150	63	28	4			71.02		3.49	1	2	2	1	1	2	1	1	1
1	55	2	170	81	28.0277	4	2.3	5.62	115.56	12.61	1.43	1	2	1	1	1	1	1	1	1
2	55	2	160	72	28.125	4	0.84	3.64	76.13	14.09	1.41	1	2	2	1	1	1	1	1	1
2	55	2	158	71	28.441	4	1.76	4.94	109.07	9.05	3.46	1	2	2	2	2	1	1	2	1
2	55	2	151	65	28.5075	4	1.77	4.95	93.54	7.59	4.72	1	2	1	2	1	1	1	1	1
2	55	2	163	76	28.6048	4	1.37	3.47	83.98	8.5	1.18	1	2	1	1	1	1	1	1	1
2	55	2	171	84	28.7268	4	1.37	4.1	91.51	9.72	3.51	1	2	1	2	1	1	1	1	1
1	55	2	166	80	29.0318	4	1.44	3.78	87.21	9.66	2.06	1	2	2	1	1	2	1	1	1
2	55	2	167	81	29.0437	4	1.57	4.13	114.38	12.7	1.39	1	2	1	1	1	1	1	1	1
1	55	2	172	86	29.0698	4	1.54	4.64	112.13	10.9	1.66	1	2.22	2	1	1	2	1	1	1
1	55	2	172	86	29.0698	4	1.28	4.84	85.31	10.79	5.05	2	2.72	1	1	1	1	1	1	1
2	55	2	155	70	29.1363	4	1.42	4.41	102.03	10.6	2.7	1	2	2	2	1	1	1	1	1
2	55	2	157	72	29.2101	4	1.5	5.39	109.56	13.59	3.34	1	2	2	1	1	1	1	1	1
1	55	2	177	92	29.3658	4	1.5	4.39	96.53	11.17	1.26	1	2	2	2	1	1	1	1	1
1	55	2	174	89	29.3962	4	1.29	4.19	67.94	9.19	2.05	1	2	2	1	1	1	1	1	1
1	55	2	172	87	29.4078	4	1.45	5.18	79.67	8.25	1.48	1	2.79	1	2	1	2	1	1	1
1	55	2	160	76	29.6875	4	1.23	4.67	84.57	11.34	1.19	1	2	1	1	1	1	1	1	1
1	55	2	175	91	29.7143	4					2.01	1	2	1	1	1	1	1	1	1
2	55	2	162	78	29.7211	4	1.21	3.98	70.07	9.11	3.09	1	2	1	1	1	1	1	1	1
1	55	2	163	79	29.7339	4	1.33	3.83	120.64	10.7	1.19	1	2	1	2	1	2	1	1	1
2	55	2	165	81	29.7521	4	1.55	4.23	97.48	8.69	5.42	2	2	2	1	1	2	2	1	1
2	55	2	160	77.5	30.2734	4	1.51	5.67	95.41	10.52	2.36	1	2	2	2	1	2	1	1	1
2	55	2	161	79	30.4772	4	1.7	4.8	109.17	12.06	1.5	1	2	2	1	1	2	2	1	1
2	55	2	159	78	30.8532	4	1.84	4.71	111.49	12	2.59	1	2	2	1	1	2	1	1	1
1	55	2	178	99	31.2461	4	1.23	4.91	83.73	8.81	1.33	1	2	1	1	1	1	1	1	1
1	55	2	177	98	31.2809	4	1.88	4.59	98.37	10.67	1.45	1	2	2	2	2	2	1	2	1
2	55	2	147	68	31.4684	4	1.17	4.57	114.9	13.99	2.55	1	2	1	2	1	2	1	1	1
1	55	2	179	101	31.5221	4	1.78	5.15	103.95	11.42	1.62	1	2.6	2	1	2	2	2	2	2
2	55	2	145	67	31.8668	4	1.79	3.87	105.6	7.93	2.76	1	2	1	2	2	1	1	2	1
1	55	2	177	100	31.9193	4	1.78	5.15	103.95	11.42	1.62	1	2.6	2	1	2	2	2	2	2
2	55	2	158	80	32.0461	4	1.73	5.31	115.61	9.74	2.78	1	2	1	2	1	1	1	1	1
1	55	2	177	101	32.2385	4	1.78	5.15	103.95	11.42	1.62	1	2.6	2	1	2	2	2	2	2
1	55	2	177	101	32.2385	4	1.68	4.28	100.24	13.3	4.36	1	3.29	1	2	1	2	1	1	1
2	55	2	162	86	32.7694	4	1.68	5.21	94.13	11.34	2.86	1	2	1	1	1	1	1	1	1
1	55	2	175	101	32.9796	4	1.78	5.15	103.95	11.42	1.62	1	2.6	2	1	2	2	2	2	2
2	55	2	162	88	33.5315	4	1.34	4.2	102.89	11.94	2.45	1	2	1	1	1	1	1	1	1
2	55	2	158	91	36.4525	4	1.35	4.5	125.29	15.68	0.67	1	2	1	1	2	1	1	2	1
2	55	2	156	75	30.8185	4					1.39	1	2	1	2	2	2	2	2	2
2	55	2	162	86	32.7694	4					1.39	1	2	1	2	2	2	2	2	2
2	55	2	162	87	33.1504	4					1.39	1	2	1	2	2	2	2	2	2
2	55	2	160	88	34.375	4					1.39	1	2	1	2	2	2	2	2	2
1	76	2	177	82	26.1738	3					2.75	1	2	1	1	1	2	2	1	1
1	73	2	168	73	25.8645	3	1.51	4.27	97.93	9.58	1.03	1	2	1	1	1	2	1	1	1
1	72	2	158	65	26.0375	3	1.14	3.89	101.33	11.61	2.06	1	2	2	2	2	1	1	2	2
1	72	2	158	66	26.4381	3	1.14	3.89	101.33	11.61	2.06	1	2	2	2	2	1	1	2	2
1	72	2	159	67	26.5021	3	1.14	3.89	101.33	11.61	2.06	1	2	2	2	2	1	1	2	2
1	72	2	155	64	26.6389	3	1.14	3.89	101.33	11.61	2.06	1	2	2	2	2	1	1	2	2
2	71	2	143	56	27.3852	3					2.66	1	2	2	2	1	2	2	1	1
2	70	2	161	71	27.3909	3	1.96	5.4	108.91	11.35	3.19	1	2	1	1	1	1	1	1	1
2	70	2	157	68	27.5873	3	1.55	4.51	95.78	9.48	2.05	1	2	2	2	1	2	2	1	1
2	68	2	158	63	25.2363	3	1.43	4.58	101.28	10.84	3.12	1	2	1	2	1	2	1	1	1
2	68	2	156	62	25.4767	3	1.4	5	111.1	11.11	2.54	1	2	2	2	1	1	1	1	1
2	68	2	150	60	26.6667	3	1.85	4.38	102.7	9.68	2.86	1	2	1	2	1	1	1	1	1
2	68	2	160	70	27.3438	3	1.43	4.58	101.28	10.84	3.12	1	2	2	1	1	2	1	1	1
2	67	2	160	62	24.2188	3	1.2	3.9	94.75	10.08	3.28	1	2	1	1	1	1	1	1	1
2	67	2	148	56	25.5661	3	1.55	5.16	110.14	12.44	1.66	1	2	2	2	2	1	1	2	1
2	67	2	150	60	26.6667	3	1.43	5.1	112.9	12.24	4.2	1	2	2	1	2	2	1	2	1
2	67	2	151	62	27.1918	3	1.38	4.11	97.55	10.24	3.22	1	2	2	1	1	2	2	1	1
2	67	2	162	72	27.4348	3	1.22	4.66	102.47	13.6	2.66	1	2	1	1	1	1	1	1	1
2	66	2	159	61	24.1288	3					3.77	1	2	1	1	1	2	1	1	1
2	66	2	156	62	25.4767	3	1.25	4.13	108.63	11.77	1.36	1	2	2	1	1	1	1	1	1
2	66	2	146	55	25.8022	3	1.31	4.11	150.03	12.73	0.31	1	2	1	1	1	1	1	1	1
2	66	2	163	70	26.3465	3	1.49	4.26	107.96	16.1	1.93	1	2	1	1	1	1	1	1	1
1	66	2	168	79	27.9904	3	1.32	4.4	125.11	15.29	2.05	1	4.1	1	1	1	2	2	1	1
2	65	2	152	56	24.2382	3	1.45	4.74	99.3	12.41	1.93	1	2	1	1	1	1	1	1	1
2	65	2	155	61	25.3902	3	1.37	4.93	118.53	13.26	0.26	1	2	2	1	1	1	1	1	1
2	65	2	159	66	26.1066	3	1.78	5.05	106.25	9.11	4.34	1	2	2	1	2	1	1	2	1
2	65	2	153	62	26.4855	3	1.4	3.53	89.27	11.42	2.94	1	2	1	2	2	2	1	2	1
2	65	2	148	60	27.3923	3	1.75	6.34	131.74	10.8	2.24	1	2	1	1	1	1	1	1	1
2	65	2	149	62	27.9267	3	1.59	5.06	93.96	9.47	3.48	1	2	1	2	1	1	1	1	1
2	64	2	156	59	24.2439	3	1.67	4	102.02	10.36	1.52	1	2	1	1	1	1	1	1	1
1	64	2	162	65	24.7676	3	1.97	4.41	115.25	11.21	5.07	2	9.03	2	1	2	1	1	2	1
1	64	2	178	80	25.2493	3	1.33	4.81	89.43	12.81	1.65	1	2	2	1	2	2	1	2	2
1	64	2	178	80	25.2493	3	1.33	4.81	89.43	12.81	1.65	1	2	2	1	2	2	1	2	2
1	64	2	176	80	25.8264	3	1.33	4.81	89.43	12.81	1.65	1	2	2	1	2	2	1	2	2
1	64	2	178	82	25.8806	3	1.33	4.81	89.43	12.81	1.65	1	2	2	1	2	2	1	2	2
2	64	2	153	62	26.4855	3	1.79	4	91.81	10.04	2.16	1	2	1	1	1	1	1	1	1
2	64	2	162	71	27.0538	3	1.28	3.78	98.67	11.28	1.38	1	2	1	2	1	1	1	1	1
2	63	2	158	60	24.0346	3	1	4.22	79.84	10.19	2.12	1	2	1	1	1	2	1	1	1
1	63	2	172	72	24.3375	3					0.91	1	2	1	2	1	1	1	1	1
2	63	2	160	65	25.3906	3	1.02				1.38	1	2	1	2	1	1	1	1	1
2	63	2	163	68	25.5937	3	1.91	5.74	138.49	17.95	0.01	1	2	2	1	1	1	1	1	1
2	63	2	162	68	25.9107	3	1.19	4.75	96.51	8.88	1.69	1	2	1	1	1	1	1	1	1
1	63	2	172	77	26.0276	3	1.41	4.78	83.23	9.72	1.08	1	2	2	2	1	2	2	1	1
2	63	2	158	65	26.0375	3				27.76	0.01	1	2	2	1	1	2	1	1	1
2	63	2	155	63	26.2227	3	1.69	4.95	123.45	11.94	2.44	1	2	1	1	1	1	1	1	1
2	63	2	157	66.9	27.1411	3	1.12	5.05	82.23	12.66	1.37	1	2	1	2	1	1	1	1	1
2	63	2	163	74	27.852	3	1.3	4.9	91.37	11.81	2.33	1	2	1	1	1	1	1	1	1
1	62	2	175	73.5	24	3	1.77	4.98	97.43	10.84	0.6	1	4.05	2	2	1	2	2	1	1
1	62	2	170	73	25.2595	3					4.32	1	2	2	1	1	2	1	1	1
2	62	2	159	67	26.5021	3	1.69	4.32	103.8	9.09	3.55	1	2	1	1	1	1	1	1	1
2	62	2	156	65	26.7094	3	1.59	4.72	102.82	12.14	2.3	1	2	1	1	1	1	1	1	1
2	62	2	169	78	27.31	3	2.05	4.65	144.56	16.04	0.03	1	2	2	1	2	2	2	2	1
2	62	2	162	72	27.4348	3	1.34	4.68	107.6	11.63	1.04	1	2	1	1	1	1	1	1	1
1	62	2	165	75	27.5482	3	1.68	4.84	110.8	13.37	1.27	1	2	2	1	1	1	1	1	1
2	61	2	164	65	24.1672	3	1.74	5.06	119.66	14.86	0.05	1	2	2	2	1	2	2	1	1
2	61	2	153	57	24.3496	3	1.67	4.13	102.19	14.15	2.84	1	2	1	2	1	2	1	1	1
2	61	2	157	63	25.5588	3	1.67	4.38	87.87	8.52	1.79	1	2	2	1	1	2	1	1	1
1	61	2	158	66	26.4381	3	1.41	3.7	98.72	11.07	3.29	1	2	1	2	1	1	1	1	1
2	61	2	152	63	27.268	3	1.51	4.6	95.74	10.22	0.98	1	2	2	1	2	1	1	2	1
2	61	2	160	70	27.3438	3	1.71	5.22	112.42	12.33	1.7	1	2	2	2	2	1	1	2	1
2	61	2	166	77	27.9431	3	1.24	4.26	83.15	10.88	1.06	1	2	2	1	1	2	2	1	1
1	60	2	160	62	24.2188	3	1.56	4.4	98.03	12.82	1.03	1	2	1	1	1	1	1	1	1
2	60	2	165	66	24.2424	3	1.51	4.28	96.12	10.06	4.72	1	2	1	1	1	1	1	1	1
2	60	2	157	60	24.3418	3	1.59	4.45	109.36	10.26	1.65	1	2	1	1	1	2	2	1	1
2	60	2	162	64	24.3865	3	1.36	4.04	99.49	11.04	1.56	1	2	2	2	1	2	1	1	1
2	60	2	162	65	24.7676	3	1.16	3.47	78.8	9.13	1.18	1	2	2	2	1	1	1	1	1
2	60	2	160	64	25	3	1.28	4.39	87.16	10.01	1.13	1	2	2	1	1	1	1	1	1
2	60	2	161	65	25.0762	3	1.59	3.38	128.97	10.99	4.41	1	2	1	2	1	2	1	1	1
2	60	2	154	60	25.2994	3					1.17	1	4.1	1	1	1	1	1	1	1
2	60	2	155	61	25.3902	3	1.37	4.01	90.36	13.26	4.28	1	2	1	1	1	1	1	1	1
2	60	2	156	62	25.4767	3	1.42	4.31	88.52	11.18	1.51	1	2	1	1	1	1	1	1	1
2	60	2	157	63	25.5588	3			71.51		2.47	1	2	1	2	1	1	1	1	1
2	60	2	155	65	27.0552	3	1.58	3.44	100.92	10.17	2.11	1	2	2	2	1	1	1	1	1
2	60	2	150	61	27.1111	3	1.42	4.77	92.4	12.59	0.96	1	2	1	1	1	1	1	1	1
2	60	2	159	69	27.2932	3			71.51		2.47	1	2	2	1	1	1	1	1	1
2	59	2	156	59	24.2439	3	1.68	5.31	106.69	8.64	1.38	1	2	2	2	1	1	1	1	1
2	59	2	154	58	24.4561	3	0.97	3.93	75.88	10.77	1.42	1	2	1	1	1	1	1	1	1
2	59	2	165	67	24.6097	3	1.12	4.24	113.54	12.53	3.81	1	2	2	2	2	2	1	2	1
2	59	2	166	68	24.677	3	1.29	3.79	95.2	11.86	2.58	1	2	2	1	1	2	1	1	1
2	59	2	159	63	24.9199	3	1.59	4.79	91.35	11.88	2.59	1	2	1	2	1	2	1	1	1
2	59	2	156	61	25.0657	3	1.33	4.13	123.98	12.65	2.02	1	2	1	1	2	1	1	2	1
2	59	2	165	69	25.3444	3	1.57	3.71	95.69	12.12	2.54	1	2	1	1	1	1	1	1	1
2	59	2	160	65	25.3906	3	1.48	4.16	73.76	8.43	2.74	1	2	1	1	1	2	1	1	1
2	59	2	154	61	25.721	3	1.5	4.24	114.6	13.88	1.57	1	2	1	1	2	2	2	2	2
2	59	2	155	62	25.8065	3	1.5	4.24	114.6	13.88	1.57	1	2	1	1	2	2	2	2	2
2	59	2	155	62	25.8065	3	2.08	5.05	96.6	11.27	1.69	1	2	2	1	1	1	1	1	1
2	59	2	166	72	26.1286	3	1.1	4.34	87.39	11.17	1.2	1	2	2	1	1	1	1	1	1
2	59	2	163	70	26.3465	3	1.51	4.46	88.6	9.07	6.59	2	2	2	1	1	2	1	1	1
2	59	2	153	62	26.4855	3	1.63	3.94	122.63	12.13	1.11	1	2	1	1	1	1	1	1	1
2	59	2	161	69	26.6193	3	1.74	5.12	105.21	11.54	1.73	1	2	1	2	1	2	2	1	1
2	59	2	162	70	26.6728	3	1.7	3.98	97.57	10.54	0.86	1	2	1	1	1	1	1	1	1
2	59	2	148	59	26.9357	3	1.38	4.58	88.33	10.06	1.23	1	2	1	1	1	1	1	1	1
2	59	2	158	68	27.2392	3	1.5	4.24	114.6	13.88	1.57	1	2	1	1	2	2	2	2	2
1	59	2	174	83	27.4145	3					0.52	1	2.17	2	1	1	1	1	1	1
1	59	2	178	87	27.4587	3					3.1	1	2	1	1	1	1	1	1	1
2	59	2	155	66	27.4714	3	1.5	4.24	114.6	13.88	1.57	1	2	1	1	2	2	2	2	2
2	59	2	164	74	27.5134	3	1.36	3.95	92.13	9.13	2.55	1	2	2	1	1	2	1	1	1
2	58	2	161	63	24.3046	3	1.52	4.32	80.31	7.6	2.41	1	2	2	1	2	2	1	2	1
2	58	2	166	67	24.3141	3	1.34	3.79	93.82	9.89	2.2	1	2	2	2	1	1	1	1	1
1	58	2	175	76	24.8163	3	1.63	5.05	101.58	12.75	2.03	1	2	1	2	1	2	1	1	1
1	58	2	171	74	25.3069	3	1.71	5.02	85	9.13	2.12	1	2	1	2	1	1	1	1	1
2	58	2	167	71	25.4581	3	1.07	3.98	92.1	11.15	1.4	1	2	2	1	1	1	1	1	1
2	58	2	151	59	25.8761	3	1.97	4.51	106.52	11.07	5.02	2	2	2	1	1	1	1	1	1
1	58	2	178	82	25.8806	3	1.77	5.05	112.7	14.22	1.89	1	2	1	1	1	1	1	1	1
2	58	2	165	71	26.079	3	1.51	4.91	78.56	9.99	1.29	1	2	1	1	1	1	1	1	1
2	58	2	156	64	26.2985	3	1.77	4.53	103.97	11.11	1.05	1	2	2	2	1	1	1	1	1
2	58	2	162	70	26.6728	3	1.78	5.64	159.56	14.83	0.89	1	2	1	1	1	1	1	1	1
2	58	2	157	66	26.7759	3	1.38	4.08	104.58	12.69	4.7	1	2	2	1	1	1	1	1	1
2	58	2	165	73	26.8136	3	0.86	3.73	74.24	9.73	0.9	1	2	2	1	1	2	1	1	1
2	58	2	166	75	27.2173	3	1.61	4.8	124.81	12.22	0.97	1	2	1	2	1	1	1	1	1
1	58	2	182	91	27.4725	3	1.22	4.85	98.59	11.1	2.5	1	2	1	1	1	1	1	1	1
2	58	2	150	62	27.5556	3	1.99	4.61	121.76	9.98	3.29	1	2	2	2	1	2	1	1	1
1	58	2	174	84	27.7447	3	1.63	4.6	84.94	11.4	1.36	1	2	1	2	1	2	1	1	1
2	58	2	161	65	25.0762	3	1.31	3.7	68.17	8.98	1.77	1	2	2	1	2	2	2	2	2
2	57	2	167	68	24.3824	3	1.15	4.48	79.31	11.73	6.47	2	2	1	2	1	2	2	1	1
1	57	2	166	68	24.677	3	1.38	5.02	93.75	11.79	1.4	1	2	1	1	1	2	1	1	1
1	57	2	170	72	24.9135	3	1.2	3.86	95.81	13.44	1.69	1	2	1	2	1	2	2	1	1
2	57	2	165	68	24.977	3	1.35	4.5	125.29	15.68	0.67	1	2	2	2	2	2	2	2	2
2	57	2	156	61	25.0657	3					5.6	2	2	1	1	1	1	1	1	1
2	57	2	165	69	25.3444	3	1.35	4.5	125.29	15.68	0.67	1	2	2	2	2	2	2	2	2
2	57	2	160	65	25.3906	3	1.79	4.53	116.34	10.81	1.78	1	2	1	1	1	1	1	1	1
2	57	2	163	68	25.5937	3	1.35	4.5	125.29	15.68	0.67	1	2	2	2	2	2	2	2	2
2	57	2	155	62	25.8065	3	1.41	4.26	115.35	10.71	1.39	1	2	1	1	1	1	1	1	1
2	57	2	168	73	25.8645	3	1.06				2.42	1	2	1	1	1	1	1	1	1
1	57	2	174	79	26.0933	3	1.7	5.1	101.95	15.06	0.66	1	2	1	1	1	1	1	1	1
2	57	2	161	69	26.6193	3	1.64	3.99	88.22	9.22	3.64	1	2	1	1	2	1	1	2	1
1	57	2	177	84	26.8122	3	1.54	4.5	79.94	12.53	1.93	1	2	2	1	2	2	2	2	1
2	57	2	160	70	27.3438	3	1.34	3.79	93.82	9.89	2.2	1	2	2	1	2	2	2	2	2
2	57	2	151	63	27.6304	3	1.04	3.3	125.12	12.49	0.39	1	2	2	2	1	2	1	1	1
1	57	2	167	78	27.968	3					1.7	1	2	1	1	1	1	1	1	1
2	57	2	161	70	27.0051	3	1.31	3.7	68.17	8.98	1.77	1	2	2	1	2	2	2	2	2
2	56	2	160	62	24.2188	3	1.65	5.09	114.69	10.78	1.64	1	2	2	1	1	1	1	1	1
1	56	2	179	78	24.3438	3	2.46	4.5	100.25	9.62	2.57	1	2	1	1	1	1	1	1	1
2	56	2	153	58	24.7768	3	1.26	3.77	111.98	11.83	3.16	1	2	2	2	1	1	1	1	1
2	56	2	168	70	24.8016	3	1.34	3.79	93.82	9.89	2.2	1	2	2	1	2	2	2	2	2
2	56	2	153	59	25.204	3					1.03	1	2	1	2	1	2	2	1	1
2	56	2	169	72	25.2092	3	1.53	3.03	86.01	8.13	0.48	1	2	2	2	1	2	1	1	1
1	56	2	177	79	25.2163	3	1.35	4.47	79.7	12.08	1.29	1	5.1	2	1	1	2	1	1	1
2	56	2	158	63	25.2363	3					0.74	1	2	2	2	2	2	1	2	1
2	56	2	166	71	25.7657	3	1.34	3.79	93.82	9.89	2.2	1	2	2	1	2	2	2	2	2
2	56	2	163	69	25.9701	3	1.05	4.76	75.67	9.08	1.99	1	2	1	1	1	1	1	1	1
2	56	2	154	62	26.1427	3	1.17	4.38	106	12.4	3.7	1	2	1	1	1	1	1	1	1
2	56	2	161	68	26.2336	3	1.31	3.84	98.89	8.54	1.96	1	2	1	2	1	1	1	1	1
2	56	2	158	66	26.4381	3	1.83	4.62	103.23	12.43	2.79	1	2	2	1	1	1	1	1	1
1	56	2	177	83	26.493	3	1.81	4.87	107.47	9.35	1.07	1	2.61	1	1	1	1	1	1	1
2	56	2	160	71	27.7344	3	1.46	4.59	134.07	11.26	4.13	1	2	2	2	2	2	2	2	1
1	56	2	175	75	24.4898	3	1.67	5.13	113.41	14.1	2.32	1	2	1	2	2	2	2	2	2
1	56	2	175	80	26.1224	3	1.67	5.13	113.41	14.1	2.32	1	2	1	2	2	2	2	2	2
2	56	2	161	68	26.2336	3	1.31	3.7	68.17	8.98	1.77	1	2	2	1	2	2	2	2	2
2	55	2	163	64	24.0882	3	1.39	4.32	92.91	9.28	0.76	1	2	1	2	1	1	1	1	1
2	55	2	155	58	24.1415	3	1.28	4.66	92.12	12.91	1.24	1	2	1	1	1	1	1	1	1
2	55	2	156	59	24.2439	3	3.8	10.06	272.59	14.42	0.72	1	2	2	2	1	2	1	1	1
2	55	2	153	57	24.3496	3	1.54	4.48	114.03	11.45	3.89	1	2	1	2	1	1	1	1	1
1	55	2	175	75	24.4898	3					1.8	1	2	1	1	1	1	1	1	1
2	55	2	159	62	24.5243	3			71.02		3.49	1	2	1	2	1	2	1	1	1
2	55	2	151	56	24.5603	3	1.25	4.01	88.2	11.14	4.61	1	2	2	1	1	2	1	1	1
2	55	2	157	61	24.7475	3	1.39	4.95	86.16	7.77	2.6	1	2	1	2	2	2	2	2	1
2	55	2	162	65	24.7676	3	1.65	4.25	94.71	9.93	5.13	2	2	1	1	1	1	1	1	1
1	55	2	165	68	24.977	3					0.67	1	2.06	1	1	2	1	1	2	1
2	55	2	165	68	24.977	3	1.27	4.05	84.8	11.18	2.36	1	2	1	2	1	1	1	1	1
2	55	2	147	54	24.9896	3	1.33	3.93	95.82	10.13	1.6	1	2	1	2	1	1	1	1	1
2	55	2	156	61	25.0657	3	1.3	4.8	104.75	11.97	2.96	1	2	1	1	1	1	1	1	1
2	55	2	168	71	25.1559	3	2.29	5.19	134.31	14.46	0.02	1	2	1	2	1	2	2	1	1
2	55	2	169	72	25.2092	3					7.5	2	2	1	1	1	1	1	1	1
1	55	2	170	73	25.2595	3	1.56	4.22	105.04	11.65	1.51	1	2	2	1	2	1	2	2	2
2	55	2	160	65	25.3906	3	1.41	3.72	90.69	10.54	1.25	1	2	1	1	1	1	1	1	1
2	55	2	156	62	25.4767	3	2.03	5.34	120.3	11.79	3.51	1	2	1	1	1	1	1	1	1
2	55	2	163	68	25.5937	3	1.34	3.79	93.82	9.89	2.2	1	2	2	1	2	2	2	2	2
2	55	2	153	60	25.6312	3	1.37	4.53	63.55	5.57	2.43	1	2	1	1	1	1	1	1	1
2	55	2	153	60	25.6312	3	1.37	4.25	91.93	10.91	1.66	1	2	1	1	1	1	1	1	1
2	55	2	154	61	25.721	3	1.43	4.77	95.4	9.92	3.84	1	2	1	1	1	1	1	1	1
2	55	2	167	72	25.8166	3					2.93	1	2	1	1	1	2	1	1	1
1	55	2	176	80	25.8264	3	1.56	4.22	105.04	11.65	1.51	1	2	2	1	2	1	2	2	2
2	55	2	161	67	25.8478	3	1.5	5.13	102.54	11.1	4.36	1	2	1	1	1	1	1	1	1
1	55	2	177	81	25.8546	3	1.62	5.46	86.02	9.72	2.11	1	5.45	2	1	1	1	1	1	1
2	55	2	147	56	25.9151	3	1.14	4.65	92.89	9.18	3.86	1	2	1	2	1	1	1	1	1
2	55	2	164	70	26.0262	3	1.68	4.99	87.7	8.23	1.88	1	2	1	2	1	2	2	1	1
1	55	2	165	71	26.079	3	1.6	5.43	95.15	11.17	5.54	2	2	2	1	1	1	1	1	1
1	55	2	180	85	26.2346	3	1.36	5.37	79.58	9.7	2.08	1	2	2	1	1	2	2	1	1
2	55	2	163	70	26.3465	3	1.49	4.93	109.3	13.38	3.87	1	2	2	2	1	2	1	1	1
1	55	2	177	83	26.493	3	1.56	4.22	105.04	11.65	1.51	1	2	2	1	2	1	2	2	2
2	55	2	168	75	26.5731	3	1.96	5.8	105.7	11.34	1.61	1	2	2	1	1	2	1	1	1
1	55	2	168	75	26.5731	3	1.99	4.61	121.76	9.98	3.29	1	2	2	2	2	2	2	2	2
2	55	2	150	60	26.6667	3	1.36	4.78	89.35	10.52	1.9	1	2	1	2	1	1	1	1	1
2	55	2	160	69	26.9531	3	1.74	4.03	95.51	10.54	2.12	1	2	2	2	1	1	1	1	1
2	55	2	169	77	26.9598	3	1.46	4.98	92.94	8.67	5.9	2	2	2	1	1	1	1	1	1
1	55	2	176	84	27.1178	3	1.56	4.22	105.04	11.65	1.51	1	2	2	1	2	1	2	2	2
2	55	2	164	73	27.1416	3	1.49	3.97	97.26	11.1	5.5	2	2	1	2	2	1	1	2	1
2	55	2	164	73	27.1416	3	1.42	4.45	92.15	11.46	1.54	1	2	2	2	1	2	1	1	1
2	55	2	166	75	27.2173	3					1.77	1	2	2	1	1	1	1	1	1
2	55	2	160	70	27.3438	3	1.12	4.53	81.75	11.48	1.91	1	2	2	1	2	1	1	2	1
2	55	2	160	70	27.3438	3					3.4	1	1	2	1	1	1	1	1	1
2	55	2	162	72	27.4348	3	1.46	4.87	124.88	13.94	1.84	1	2	2	2	1	1	1	1	1
2	55	2	163	73	27.4756	3	1.8	4.74	93.78	10.39	1.37	1	2	2	2	1	2	2	1	1
1	55	2	162	73	27.8159	3	1.75	4.31	87.14	10.75	1.47	1	2	2	1	1	1	1	1	1
2	55	2	157	69	27.993	3	1.57	5.69	107.33	11.16	1.84	1	2	1	2	1	1	1	1	1
1	55	2	173	84	28.0664	3	1.99	4.61	121.76	9.98	3.29	1	2	2	2	2	2	2	2	2
1	55	2	173	84	28.0664	3	1.99	4.61	121.76	9.98	3.29	1	2	2	2	2	2	2	2	2
1	55	2	170	85	29.4118	3	1.99	4.61	121.76	9.98	3.29	1	2	2	2	2	2	2	2	2
2	55	2	160	66	25.7812	3	1.65	3.68	95.79	8.74	2.72	1	2	2	2	2	2	2	2	2
2	55	2	156	66	27.1203	3	1.65	3.68	95.79	8.74	2.72	1	2	2	2	2	2	2	2	2
2	55	2	170	79	27.3356	3	3.8	10.06	272.59	14.42	0.72	1	2	2	2	2	2	2	2	2
2	55	2	160	70	27.3438	3	1.65	3.68	95.79	8.74	2.72	1	2	2	2	2	2	2	2	2
2	55	2	170	80	27.6817	3	3.8	10.06	272.59	14.42	0.72	1	2	2	2	2	2	2	2	2
1	72	2	159	60	23.7332	2	1.14	3.89	101.33	11.61	2.06	1	2	2	2	2	1	1	2	2
2	71	2	168	53	18.7783	2	1.32	3.78	116.28	11.6	0.44	1	2	1	1	1	1	1	1	1
2	71	2	168	66	23.3844	2	1.55	4.51	95.78	9.48	2.05	1	2	2	1	2	2	1	2	1
2	71	2	168	67	23.7387	2	1.55	4.51	95.78	9.48	2.05	1	2	2	1	2	2	1	2	1
2	69	2	154	55	23.1911	2	1.6	4.86	115.89	9.98	1.83	1	2	1	1	1	1	1	1	1
2	68	2	152	50	21.6413	2	1.51	4.1	101.54	10.76	1.78	1	2	1	2	2	2	2	2	2
2	68	2	155	56	23.3091	2	1.77	5.28	102.9	11.61	1.24	1	2	2	2	2	2	2	2	1
2	67	2	158	54	21.6311	2	1.51	5.35	101.35	11.72	2.12	1	2	2	1	1	1	1	1	1
2	67	2	163	61	22.9591	2	1.57	3.62	104.28	10.91	1.54	1	2	2	2	1	1	1	1	1
2	67	2	155	56	23.3091	2	1.77	5.28	102.9	11.61	1.24	1	2	2	2	2	2	2	2	1
2	67	2	163	62	23.3355	2	1.57	3.62	104.28	10.91	1.54	1	2	2	2	1	1	1	1	1
2	67	2	162	62	23.6244	2	1.27	4.65	99.5	12.39	0.67	1	2	2	2	1	1	1	1	1
2	67	2	161	62	23.9188	2	1.27	4.65	99.5	12.39	0.67	1	2	2	2	1	1	1	1	1
2	66	2	154	55	23.1911	2	2.54	5.64	114.33	10.06	3.14	1	2	2	1	1	2	2	1	1
2	66	2	151	54	23.6832	2					2.21	1	2	2	2	2	2	2	2	2
2	66	2	165	65	23.8751	2	1.61	4.6	117.46	13.51	1.15	1	2	2	2	1	2	1	1	1
2	65	2	159	55	21.7555	2	1.57	4.06	96.73	11.61	5.41	2	2	2	1	2	2	2	2	1
2	65	2	147	49	22.6757	2	1.23	3.63	101.41	13.1	2.98	1	2	2	1	1	1	1	1	1
2	65	2	148	50	22.8269	2	1.57	4.06	96.73	11.61	5.41	2	2	1	1	1	2	2	1	1
2	65	2	148	50	22.8269	2	1.57	4.06	96.73	11.61	5.41	2	2	1	1	1	2	2	1	1
2	65	2	163	62	23.3355	2				29.53	0.01	1	2	2	2	1	1	1	1	1
2	65	2	153	55	23.4952	2	1.01	3.97	80.35	12.6	3.26	1	2	2	1	1	1	1	1	1
2	65	2	153	56	23.9224	2	1.39	4.58	97.12	12.2	4.35	1	2	2	2	2	1	1	2	1
2	64	2	160	52	20.3125	2	1.77	5.13	142.1	11.71	1.52	1	2	1	1	1	1	1	1	1
2	64	2	164	55	20.4491	2	1.5	4.24	114.6	13.88	1.57	1	2	1	2	1	2	1	1	1
2	64	2	163	62	23.3355	2				29.53	0.01	1	2	2	2	1	1	1	1	1
2	64	2	159	59	23.3377	2	1.8	4.73	95.16	10.35	2.89	1	2	1	1	1	1	1	1	1
1	64	2	168	66	23.3844	2	1.47	4.13	77.33	8.63	0.72	1	2	1	2	1	2	2	1	1
2	64	2	153	55	23.4952	2	1.01	3.97	80.35	12.6	3.26	1	2	2	1	1	1	1	1	1
1	64	2	175	72	23.5102	2	1.47	4.98	94.37	12.62	2.36	1	2	2	1	1	2	2	1	1
1	64	2	175	72	23.5102	2	1.47	4.98	94.37	12.62	2.36	1	2	2	1	1	2	2	1	1
1	64	2	169	68	23.8087	2	1.78	4.95	101.28	9.18	1.61	1	2	2	2	1	2	2	1	1
2	63	2	155	56	23.3091	2	1.25	5.09	92.87	12.48	3.09	1	2	2	1	1	1	1	1	1
2	63	2	159	59	23.3377	2	1.8	4.73	95.16	10.35	2.89	1	2	1	1	1	1	1	1	1
2	63	2	160	60	23.4375	2					3.14	1	2	1	1	1	2	1	1	1
2	62	2	161	51	19.6752	2	1.38	4.25	79.43	11.04	2.98	1	2	1	2	1	2	2	1	1
2	62	2	162	52	19.8141	2	1.39	4.23	113.58	11.13	1.04	1	2	2	1	1	2	2	1	1
2	62	2	158	52	20.83	2	1.7	4.85	192.12	10.89	2.28	1	2	1	1	1	1	1	1	1
1	62	2	162	61	23.2434	2	1.19	4.43	89.82	10.49	1.32	1	2	1	1	1	1	1	1	1
2	62	2	155	56	23.3091	2	1.25	5.09	92.87	12.48	3.09	1	2	2	1	1	1	1	1	1
1	62	2	168	66	23.3844	2	1.47	4.13	77.33	8.63	0.72	1	2	1	2	1	2	2	1	1
2	62	2	160	60	23.4375	2					3.14	1	2	1	1	1	2	1	1	1
2	62	2	155	57	23.7253	2					1.13	1	2	1	1	1	1	1	1	1
2	61	2	157	50	20.2848	2	1.39	3.53	72.87	11.25	2.07	1	2	1	1	1	1	1	1	1
2	61	2	155	52	21.6441	2	1.16	4.65	70.91	11.1	1.59	1	2	1	2	1	1	1	1	1
2	61	2	158	57	22.8329	2	1.55	4.4	89.24	10.54	4.43	1	2	1	1	1	1	1	1	1
1	61	2	168	65	23.03	2	1.2	3.86	69.27	11.05	1.94	1	2	1	1	1	1	1	1	1
2	61	2	164	62	23.0518	2	1.4	3.71	94.91	11.46	1.71	1	2	1	1	1	1	1	1	1
2	61	2	164	62	23.0518	2	1.67	4.25	142.27	11.42	1.47	1	2	1	1	1	1	1	1	1
2	61	2	158	58	23.2335	2	1.32	4.09	102.72	10.55	2.13	1	2	2	1	1	1	1	1	1
1	61	2	162	61	23.2434	2	1.19	4.43	89.82	10.49	1.32	1	2	1	1	1	1	1	1	1
2	60	2	155	48	19.9792	2	1.51	5.19	87.87	9.1	0.69	1	2	1	2	1	2	1	1	1
2	60	2	158	54	21.6311	2	1.34	3.97	73.68	7.8	1.85	1	2	1	1	1	2	1	1	1
2	60	2	159	56	22.151	2	1	4.37	90.12	12.44	0.45	1	2	1	1	1	1	1	1	1
2	60	2	163	59	22.2063	2	1				2.19	1	2	1	1	1	1	1	1	1
2	60	2	162	60	22.8624	2					1.65	1	2	1	1	1	1	1	1	1
2	60	2	155	55	22.8928	2	1.88	4.32	89.95	8.95	4.94	2	2	2	1	1	2	1	1	1
2	60	2	155	55	22.8928	2	1.05	4.61	74.85	9.26	3.17	1	2	1	1	1	1	1	1	1
2	60	2	161	60	23.1473	2	1.15	4.08	83.76	11.4	4.86	2	2	1	1	1	2	1	1	1
2	60	2	158	58	23.2335	2	1.32	4.09	102.72	10.55	2.13	1	2	2	1	1	1	1	1	1
2	60	2	158	58	23.2335	2	1.61	4.58	65.17	10.16	4.5	1	2	1	1	1	1	1	1	1
2	59	2	160	56	21.875	2	1.51	5.39	104.44	12.88	1.67	1	2	1	2	1	2	2	1	1
2	59	2	159	56	22.151	2	1.44	4.67	112.57	12.69	1.49	1	2	1	1	1	1	1	1	1
2	59	2	164	61	22.68	2	1.31	4.87	82.21	11.39	3.76	1	2	1	1	1	1	1	1	1
2	59	2	170	69	23.8754	2	1.3	3.99	93.31	11.39	3.07	1	2	1	1	1	1	1	1	1
2	58	2	159	49	19.3821	2	1.37	4.37	99.45	13.65	1.15	1	2	1	1	1	1	1	1	1
1	58	2	158	49	19.6283	2	1.65	4.87	96.89	10.89	1.2	1	2	1	2	1	2	1	1	1
2	58	2	170	57	19.7232	2	1.74	4.76	110.57	13.14	2.97	1	2	1	1	1	1	1	1	1
1	58	2	170	61	21.1073	2	1.34	4.18	84.08	10.56	0.78	1	4.03	1	1	1	1	1	1	1
2	58	2	170	63	21.7993	2	1.65	5.15	105.16	10.52	2.17	1	2	1	1	1	2	1	1	1
2	58	2	153	52	22.2137	2	1.32	4.2	106.73	12.4	2.91	1	2	1	1	1	1	1	1	1
2	58	2	160	58	22.6562	2	1.47	3.98	89.38	11.21	3.09	1	2	1	1	1	1	1	1	1
2	58	2	160	59	23.0469	2	1.71	4.61	116.35	13.73	6.29	2	2	1	1	1	1	1	1	1
2	58	2	157	57	23.1247	2	1.54	5.32	93.86	9.26	4.01	1	2	2	2	1	1	1	1	1
2	58	2	158	58	23.2335	2	1.38	4.47	94.61	11.77	1.89	1	2	1	1	1	1	1	1	1
2	58	2	158	59	23.634	2	1.38	4.47	94.61	11.77	1.89	1	2	1	1	1	1	1	1	1
2	58	2	152	55	23.8054	2	1.65	5.77	105.96	11.24	2.74	1	2	1	1	1	1	1	1	1
1	58	2	166	66	23.9512	2	1.17	4.49	95.95	11.57	1.91	1	2	1	1	1	1	1	1	1
2	57	2	152	46	19.91	2					2.16	1	2	1	1	1	1	1	1	1
2	57	2	158	50.8	20.3493	2	1.91	5.36	94	12.61	1.51	1	2	1	2	1	2	1	1	1
2	57	2	160	55	21.4844	2	1.74	4.57	90.47	10.11	5.83	2	2	1	1	1	1	1	1	1
2	57	2	165	60	22.0386	2	1.35	4.5	125.29	15.68	0.67	1	2	2	2	2	2	2	2	2
2	57	2	160	58	22.6562	2	1.36	4.32	66.39	7.14	5.17	2	2	1	2	1	1	1	1	1
2	57	2	166	63	22.8625	2	1.53	5.14	109.65	11.03	1.9	1	2	2	1	1	2	1	1	1
2	57	2	151	53	23.2446	2	1.11	3.21	83.35	11.83	1.88	1	2	1	1	1	1	1	1	1
1	57	2	175	72	23.5102	2	1.99	5.75	115.64	10.31	1.76	1	2	1	2	1	1	1	1	1
2	57	2	158	59	23.634	2					1.35	1	2	1	2	1	1	1	1	1
2	56	2	152	50	21.6413	2	1.14	4.2	108.17	10.13	3.23	1	2	1	1	1	1	1	1	1
2	56	2	162	60	22.8624	2	1.49	4.6	115.75	12.9	2.88	1	2	2	2	1	1	1	1	1
2	56	2	168	65	23.03	2	1.54	3.52	103.34	8.93	1.62	1	2	1	1	1	2	1	1	1
2	56	2	151	53	23.2446	2	1.11	3.21	83.35	11.83	1.88	1	2	1	1	1	1	1	1	1
2	56	2	155	56	23.3091	2	1.48	3.61	114.69	9.19	1.49	1	2	2	1	1	2	2	1	1
2	56	2	159	59	23.3377	2	1.31	3.81	109.64	13.93	2.26	1	2	1	2	1	1	1	1	1
1	56	2	175	72	23.5102	2	1.99	5.75	115.64	10.31	1.76	1	2	1	2	1	1	1	1	1
2	56	2	158	59	23.634	2					1.35	1	2	1	2	1	1	1	1	1
2	56	2	160	60	23.4375	2	1.65	3.68	95.79	8.74	2.72	1	2	2	2	2	2	2	2	2
2	56	2	162	62	23.6244	2					1.39	1	2	1	2	2	2	2	2	2
2	55	2	162	51	19.433	2	1.33	4.81	89.43	12.81	1.65	1	2	1	2	1	2	1	1	1
2	55	2	170	59	20.4152	2					2.37	1	2	1	1	1	2	1	1	1
2	55	2	168	60	21.2585	2	1.79	5.55	121.97	12.15	3.03	1	2	1	1	1	1	1	1	1
2	55	2	145	46	21.8787	2	1.54	4.17	97.75	11.34	3.3	1	2	2	2	1	1	1	1	1
2	55	2	164	59	21.9363	2	1.56	5.02	97.84	11.42	2.49	1	2	1	1	1	1	1	1	1
2	55	2	161	57	21.9899	2	1.82	4.38	89.79	11.06	3.77	1	2	2	1	1	2	1	1	1
2	55	2	155	53	22.0604	2					0.96	1	2	1	2	1	2	2	1	1
2	55	2	155	53	22.0604	2	1.32	4.04	74.29	7.61	3.15	1	2	1	1	1	1	1	1	1
2	55	2	153	52	22.2137	2	1.27	4.56	106.02	11.3	2.09	1	2	1	2	1	2	1	1	1
2	55	2	157	55	22.3133	2					1.86	1	2	2	1	1	2	1	1	1
2	55	2	168	63	22.3214	2					2.2	1	2	1	2	1	1	1	1	1
2	55	2	155	54	22.4766	2	1.41	3.93	102.88	9.36	4.13	1	2	1	1	1	1	1	1	1
2	55	2	163	60	22.5827	2	1.4	4.07	106.47	12.72	1.37	1	2	1	2	1	1	1	1	1
2	55	2	157	56	22.719	2	1.69	4.43	108.2	10.37	2.18	1	2	2	1	1	2	1	1	1
2	55	2	154	54	22.7694	2	1.37	4.55	108.21	9.82	2.27	1	2	2	2	2	2	1	2	1
2	55	2	162	60	22.8624	2	1.67	5.13	113.41	14.1	2.32	1	2	1	2	1	2	1	1	1
2	55	2	162	60	22.8624	2	1.35	4.26	82.22	9.9	2.6	1	2	1	1	1	1	1	1	1
1	55	2	176	71	22.921	2	1.56	4.22	105.04	11.65	1.51	1	2	2	1	2	1	2	2	2
2	55	2	156	56	23.0112	2	1.53	5.33	111.36	13.18	1.78	1	2	1	2	1	2	1	1	1
2	55	2	157	57	23.1247	2	1.75	4.73	104.97	11.26	5.54	2	2	2	1	1	2	1	1	1
2	55	2	155	56	23.3091	2	1.48	3.61	114.69	9.19	1.49	1	2	2	1	1	2	2	1	1
2	55	2	159	59	23.3377	2	1.31	3.81	109.64	13.93	2.26	1	2	1	2	1	1	1	1	1
1	55	2	173	70	23.3887	2	1.65	5.98	114.32	10.9	1.01	1	2	2	2	1	1	1	1	1
2	55	2	149	52	23.4224	2	1.65	3.68	95.79	8.74	2.72	1	2	2	2	1	2	1	1	1
2	55	2	160	60	23.4375	2	1.67	4.07	101.69	13.45	2.13	1	2	2	1	1	1	1	1	1
2	55	2	160	60	23.4375	2	1.61	5.16	106.37	12.01	2.55	1	2	2	2	1	1	1	1	1
1	55	2	178	75	23.6713	2	1.78	5.15	103.95	11.42	1.62	1	2.6	2	1	2	2	2	2	2
1	55	2	163	63	23.7118	2	2.08	5.97	105.96	11.52	0.82	1	2	1	1	2	2	1	2	1
2	55	2	159	60	23.7332	2	1.43	4.28	93.27	7.97	7.36	2	2	2	2	2	2	2	2	1
2	55	2	160	61	23.8281	2	1.74	5.53	116.44	12.45	2.04	1	2	2	1	1	1	1	1	1
2	55	2	160	61	23.8281	2	1.67	4.07	101.69	13.45	2.13	1	2	2	1	1	1	1	1	1
2	55	2	149	53	23.8728	2	1.65	3.68	95.79	8.74	2.72	1	2	2	2	1	2	1	1	1
2	55	2	165	65	23.8751	2	1.59	4.44	115	11.98	2.32	1	3.12	2	1	1	1	1	1	1
2	55	2	166	66	23.9512	2	1.45	4.15	103.64	13.03	1.26	1	2	1	1	1	1	1	1	1
2	55	2	160	60	23.4375	2	1.65	3.68	95.79	8.74	2.72	1	2	2	2	2	2	2	2	2
2	55	2	162	62	23.6244	2					1.39	1	2	1	2	2	2	2	2	2
2	57	2	159	44	17.4044	1	1.33	4.14	112.16	12.8	1.84	1	2	1	1	1	1	1	1	1
2	56	2	163	48	18.0662	1	1.5	5.05	117.38	16.67	1.59	1	2	1	1	1	2	1	1	1
2	56	2	146	39	18.2961	1	1.5	4.53	126.97	15.49	1.94	1	2	1	1	1	1	1	1	1
